# Supplementary material for: Minimizing habitat conflicts in meeting net-zero energy targets in the western United States
Source: PubMed Central journal article supplement (PMC9942791; doi:10.1073/pnas.2204098120), 2023-01-19
Supplement: pnas.2204098120.sapp.pdf [file pnas.2204098120.sapp.pdf]

# Supporting Information

## Minimizing habitat conflicts in meeting net zero energy targets in the Western United States

Grace C. Wu\*, Ryan A. Jones, Emily Leslie, James H. Williams, Andrew Pascale, Erica Brand, Sophie S. Parker, Brian S. Cohen, Joseph E. Fargione, Julia Prochnik, Maya Batres, Mary G. Gleason, Michael H. Schindel, Benjamin M. Sleeter, Charlotte K. Stanley

\*Corresponding author. E-mail: [gracecwu@ucsb.edu](mailto:gracecwu@ucsb.edu)

### This PDF file includes:

- Supplementary text
- Figs. S1 to S29
- Tables S1 to S21
- SI References

## Contents

|          |                                                                               |           |
|----------|-------------------------------------------------------------------------------|-----------|
| <b>1</b> | <b>Access to data, code, and results</b>                                      | <b>2</b>  |
| A        | Input data . . . . .                                                          | 2         |
| B        | Code . . . . .                                                                | 2         |
| C        | Results . . . . .                                                             | 2         |
| <b>2</b> | <b>Additional methods</b>                                                     | <b>3</b>  |
| A        | Stage 1: Development of environmental exclusions and Siting Levels . . . . .  | 3         |
| A.1      | Overview . . . . .                                                            | 3         |
| A.2      | Environmental exclusion categories . . . . .                                  | 3         |
| A.3      | Environmental Siting Levels . . . . .                                         | 5         |
| B        | Stage 2. Renewable resource assessment and supply curve development . . . . . | 5         |
| B.1      | Utility-scale solar, onshore wind, and offshore wind . . . . .                | 5         |
| B.2      | Urban infill solar and rooftop PV . . . . .                                   | 6         |
| B.3      | Biomass assumptions . . . . .                                                 | 7         |
| B.4      | Accounting for existing power plant footprints . . . . .                      | 10        |
| C        | Step 3. Power line modeling . . . . .                                         | 10        |
| C.1      | Overview . . . . .                                                            | 10        |
| C.2      | Inter-state transmission modeling . . . . .                                   | 10        |
| C.3      | Spur line modeling . . . . .                                                  | 18        |
| D        | Step 4. Energy modeling . . . . .                                             | 21        |
| D.1      | Creating supply curves from candidate project areas . . . . .                 | 22        |
| D.2      | Scenarios . . . . .                                                           | 22        |
| E        | Stage 5. Downscaling and land use estimates . . . . .                         | 23        |
| E.1      | Onshore wind and utility-scale solar . . . . .                                | 23        |
| E.2      | Offshore wind . . . . .                                                       | 26        |
| E.3      | Power lines . . . . .                                                         | 26        |
| E.4      | Land use estimates for other technologies . . . . .                           | 26        |
| F        | Stage 6. Strategic environmental assessment . . . . .                         | 27        |
| <b>3</b> | <b>Additional results</b>                                                     | <b>35</b> |
| A        | Energy modeling results . . . . .                                             | 35        |
| B        | Sensitivity results . . . . .                                                 | 35        |

## Supporting Information Text

### 1. Access to data, code, and results

**A. Input data.** The Renewable Resource Areas (Fig. S3) and Environmental Exclusion (Fig. S2) spatial data will be available for download upon publication of this paper. The data will also be presented in an interactive online webmap.

Historical Ventyx spatial data on the U.S. transmission network used in the regression-based downscaling stage of the analysis are part of a proprietary subscription-based dataset, called the Velocity Suite, that was purchased under a non-disclosure agreement. This dataset is available for anyone to purchase using the following link: <https://new.abb.com/enterprise-software/energy-portfolio-management/market-intelligence-services/velocity-suite>

**B. Code.** Code to perform ORB (Optimal Renewable Energy Build-out) analysis, including resource assessment (site suitability; Step 2), site selection (Step 4), and strategic environmental assessment (Step 5) will be available on the following Github repository upon the publication of the paper: <https://github.com/grace-cc-wu/PoPWest>. A generic version of the site suitability model using only raster inputs and the model used to create candidate project areas are available for free (open source) on [the MapRE website](#) as Script Tool B-1 and B-2, respectively.

**C. Results.** All generated results will be publicly available on <https://github.com/grace-cc-wu/PoPWest> except the selected project area locations. The selected project area results associated with a given scenario identify possible locations for new energy generation based on the criteria selected by the authors and using regression methods. This study is based on scenario analysis and is not a siting study capable of making prescriptions or predictions of where which areas will or should be developed. However, many of these lands are privately-owned so the data could easily be mis-interpreted by users or landowners as identifying lands which are targeted or sanctioned for renewable energy development by the organizations involved in the study. These data are not publicly available due to the risk of mis-interpretation and the legal and political risks associated with a possible change in market value associated with this identification.

## 2. Additional methods

### A. Stage 1: Development of environmental exclusions and Siting Levels.

**A.1. Overview.** Stage 1 was the development of siting constraints on energy infrastructure development that represent increasing levels of ecosystem protection, starting with land and waters that are already protected and expanding protections to areas not currently protected. This information was compiled based on the expert knowledge of the co-authors in consultation with other scientists at the state chapters of The Nature Conservancy (TNC) in each of the eleven western states and other stakeholders in these states.

**A.2. Environmental exclusion categories.** The compilation of environmental data for this study followed methods and conventions used in the original Power of Place study (1, 2) and other prior work (3–8). We separated our study area into two geographic realms: terrestrial and marine. For the terrestrial realm, we began with the final list of 168 data layers used in the original Power of Place study and updated these to incorporate changes made by external parties in datasets over time. For the marine realm, we used data from publicly available sources and expert guidance from TNC marine and geospatial scientists to sort and compile data. As our analysis only considers wind power technologies offshore, we included data pertinent to informing environmental exclusions only for this technology type in the marine realm.

For each realm, we aggregated environmental data into three categories, which we refer to as Environmental Exclusion Categories. The categories range from lands or waters with high levels of protection due to legal restrictions that prevent development (Category 1), to lands or waters that have low to no formal protection yet high conservation values (Category 3). The definitions of the three Environmental Exclusion Categories for the terrestrial and marine realms are as follows (see Tables S17–S19 and the full spreadsheet linked [here](#) for an exhaustive list of individual datasets in each Category):

For the terrestrial realm:

- **Category 1 (Legally protected)** Areas with existing legal restrictions against energy development. (Examples: National Wildlife Refuge, National Parks)
- **Category 2 (Administratively protected)** Areas where the siting of energy requires consultation or triggers a review process to primarily protect ecological values, cultural values, or natural characteristics. This Category includes areas with existing administrative and legal designations by federal or state public agencies where state or federal law requires consultation or review. Lands owned by non-governmental organizations (NGOs) that have conservation obligations are also included in this Category. Multiple-use federal lands such as Forest Service lands without additional designations were not included in this Category, although in some prior studies they have been. (Examples: Critical Habitat for Threatened or Endangered Species, Sage Grouse Priority Habitat Management Areas, vernal pools, and Wetlands)
- **Category 3 (High conservation value)** Areas with high conservation value as determined through multi-state or ecoregional analysis (e.g., state, federal, academic, NGO) primarily characterizing the ecological characteristics of a location or wildlife corridor. This category may also include lands that have social, economic, or cultural value. Prime farmlands as determined by the U.S. Department of Agriculture (USDA) are also included in this Category (though they were only included as a solar exclusion, not as a wind exclusion). Despite their conservation value, these lands typically do not have formal conservation protections. (Examples: Prime Farmland, Important Bird Areas, big game priority habitat and corridors, The Nature Conservancy Ecologically Core Areas)

For the marine realm:

- **Category 1 (Legally protected):** Areas with existing legal restrictions against energy development, or where development would be very difficult based on assumptions about the underlying intentions of the designations for these areas. (Examples: State and Federal Marine Reserves, National Marine Sanctuaries)
- **Category 2 (Administratively protected with a high level of review):** Locations that require a higher level of approval/review due to existing restrictions. Areas where the seafloor is protected and anchoring of wind infrastructure may trigger review.
- **Category 3 (Administratively protected with a low level of review or no review):** Locations that require less approval/review for development than those contained in Category 2, and other areas of high conservation value.

In contrast with Wu et al. (2020) (1), we elected to use three Environmental Exclusion Categories instead of four. This was necessary to limit the number of scenarios run in Energy Pathways and RIO modeling. The original Power of Place Category 4 lands captured Landscape Intactness. These were lands without formal conservation protection that have potential conservation value based on their contribution to intact landscape structure, including lands that maintain habitat connectivity or have high landscape intactness (low habitat fragmentation). Most of the lands (85%) captured in the original Power of Place study's Category 4 were incorporated into Category 3 lands in this analysis through the inclusion of data from TNC's Resilient and Connected Network (RNC) (9). The following data from the RCN were included in Category 3 for all 11 states:

- 10 Resilient, Diffuse Flow (Climate Informed), Recognized Biodiversity Value
- 30 Resilient, Diffuse Flow, Recognized Biodiversity

- 50 Resilient, Concentrated Flow (Climate Informed), Recognized Biodiversity
- 60 Resilient, Concentrated Flow (Climate Informed)
- 70 Mostly Resilient, Concentrated Flow, Recognized Biodiversity
- 80 Mostly Resilient, Concentrated Flow
- 91 Resilient, Recognized Biodiversity

Additionally, we included the following layers from the RCN into Category 3 for the Pacific Northwest RCN area (Oregon and Washington) only:

- 20 Resilient, Diffuse Flow (Climate Informed)
- 40 Resilient, Diffuse Flow

The draft list of data layers and categorization decisions were subjected to several rounds of review, and comments were incorporated from The Nature Conservancy (TNC) state chapters and select peer NGOs. After review and refinement, we generated a final list of 180 data layers for Categories 1, 2, and 3 (SM Tables S17–S19). See the full spreadsheet linked here for more detailed descriptions of data, rationale for their categorization, and their sources. For each of the three Categories in both the terrestrial and marine realms, the constituent data layers were aggregated into a single layer. These three aggregated layers were applied in the site suitability analysis (Stage 2) and in Stage 6: Strategic Impact Assessment.

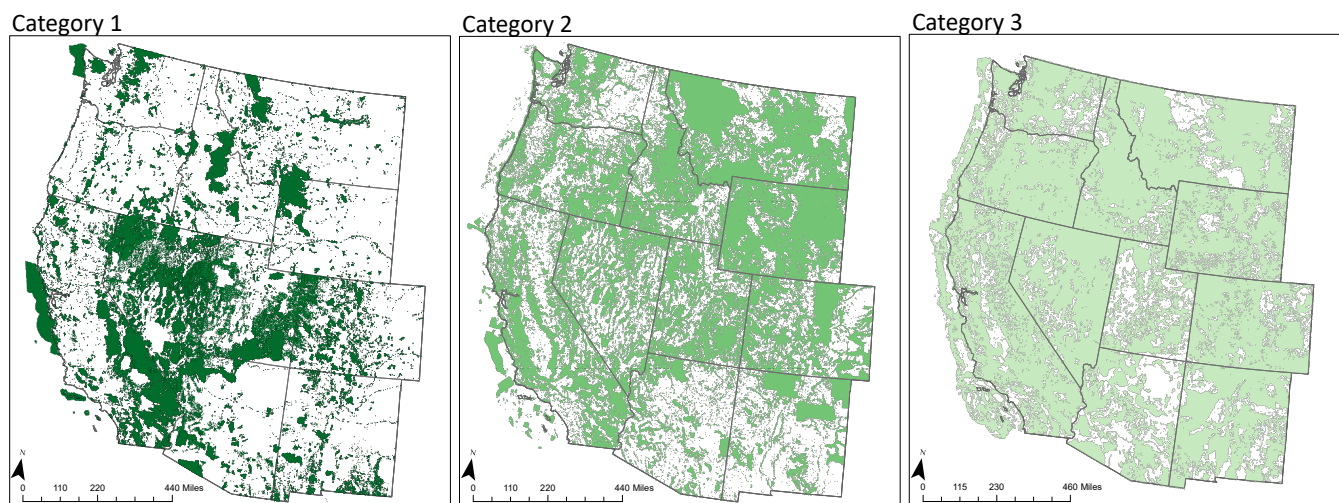

Fig. S1. Environmental Exclusion Categories

**Indigenous Lands** We recognize the sovereignty of Indigenous Nations, and supports Indigenous Nations in their self-determination and self-sufficiency, in all cases, including when it comes to energy decisions and development. In respect of the sovereignty of indigenous nations, indigenous lands are not included in the analysis. Indigenous lands cover about 50 million acres and represent about 6.25% of the study area.

The datasets that were used in the original Power of Place that were excluded from this analysis included:

- US Census Bureau, Tribal Lands, Cartographic Boundary Shapefiles - American Indian/Alaska Native Areas/Hawaiian Home Lands, [https://www.census.gov/geo/maps-data/data/cbf/cbf\\_aiannh.html](https://www.census.gov/geo/maps-data/data/cbf/cbf_aiannh.html)
- USGS Protected Areas Database of the US, PAD-US, Native Allotments, Native Allotments provide for the division of tribally held lands into individually-owned parcels, <https://gapanalysis.usgs.gov/padus/>
- USGS Protected Areas Database of the US, PAD-US, Native American Lands, Federal territory managed by Native American tribes for the Bureau of Indian Affairs, <https://gapanalysis.usgs.gov/padus/>
- WSDOT, WSDOT - Tribal Reservation and Trust Lands1, <http://www.wsdot.wa.gov/mapsdata/geodatacatalog/default.htm>



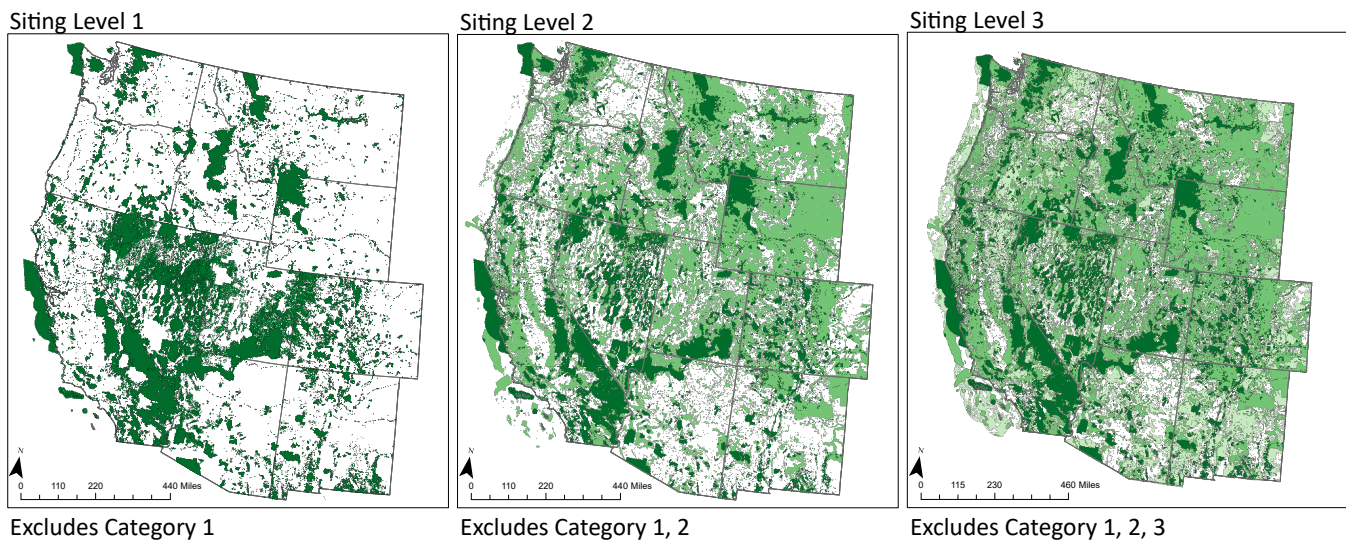

Fig. S2. Environmental Siting Levels

**A.3. Environmental Siting Levels.** Using the three Environmental Exclusion Categories and the technical and economically suitable areas, we created four supply curves, which are referred to as Siting Levels (SL) 1, 2, and 3 (Fig. S2). All Siting Levels use the same set of technical and economically suitable areas, but are additive in their use of the Environmental Exclusion Categories. That is, Siting Level 1 excludes only land area datasets in Category 1; Siting Level 2 excludes land area datasets in Categories 1 and 2; and Siting Level 3 excludes land area datasets in Categories 1, 2, and 3. As such, as the Siting Level increases, more land is protected from development.

## B. Stage 2. Renewable resource assessment and supply curve development.

**B.1. Utility-scale solar, onshore wind, and offshore wind.** Stage 2 involved conducting spatially-explicit resource assessments for the following renewable energy technologies: onshore wind, offshore wind, utility-scale ground-mounted solar PV, and distributed urban-infill PV. Additionally, we used existing studies to construct supply curves for biomass and adoption assumptions for rooftop PV.

**Capacity factor estimates** For offshore wind, we calculated annual average capacity factors for each gridded cell within the WIND Toolkit Offshore Summary Dataset using 7 year average weibull parameters at 100m hub height and the NREL 5 MW offshore reference turbine power curve (from the System Advisory Model (10)). Because the WIND Toolkit offshore wind dataset only covers federal waters about 50 nautical miles offshore, we interpolated the capacity factor values for state waters, which extends 5-10 km offshore, using an inverse distance weighting approach. While an imperfect approach, very few CPAs exist in state waters after applying the siting exclusions, so we expect the method for estimating CFs in state waters to have little impact on the overall offshore wind supply curve. We then used SAM to estimate wake losses using the following parameter inputs: NREL 5 MW reference offshore turbine, the Park (WaSP) wake effects model with 0.1 turbulence, a 100 MW wind farm, and Northern California and Northwestern Oregon AWS truepower representative wind profiles. This yielded a wake effects loss of about 8.9%. Other losses included availability (5.5%), turbine performance (3.95%), and environmental (2.39%).

For utility scale, ground-mounted solar, we used the SAM and the the Physical Solar Model (PSM) version 3 of the National Solar Radiation Database (NSRDB) to estimate annual average CFs for each 10 km grid cell assuming single axis tracking solar PV technology. We estimated capacity factors for 2010 and 2011 (two of the three historic demand demand years in RIO) and then averaged the two years. We used the NSRDB API and the SAM Python code generator (PySSC Python library) to automate the process. For SAM technology parameters, we used the Yingli Energy China 275-35B module with Emerson SPV-5.0 inverter, an inverter loading ratio of 1.4, 1-axis tracking with no tilt, 5% soiling losses, 1% AC wiring loss, 0.5% transformer load loss, no transmission losses (which will be modeled as part of spur line modeling), 1% AC system availability losses, and 0.5% DC degradation rate.

For onshore wind, we used the annual average capacity factors calculated by NREL using the full WIND Toolkit dataset, which has national continuous coverage (11). CFs were estimated based on three representative turbines, selected at each site based on annual average wind speeds at 80 m hub height. The 16.7% losses applied to the CFs (15% losses and 98% availability) includes array wake losses, electrical collection and transmission losses, and blade soiling losses.

**Creating Candidate Project Areas** For identifying suitable sites and creating candidate project areas (CPAs), we closely follow the approach described in Wu et al. 2020 (1). We restate those methods here to facilitate reader understanding, noting where

modifications have been made. In order to identify suitable areas, we used Stage 1 of the [MapRE \(Multi-criteria Analysis for Planning Renewable Energy\) Zoning Tool \(12\)](#), which uses Python raster-based algebraic geoprocessing functions and siting assumptions specified for each dataset and technology (Tables S2 - S3). MapRE Zone Tools are the graphical user interface version of the Optimal Renewable energy Build-out (ORB) tools and are part of the ORB suite of siting tools. Using the MapRE Script Tool B-1, we created a single 250 meter resolution raster of areas that satisfy techno-economic siting criteria for each technology (i.e., suitability map). Techno-economic exclusions (Tables S2 - S3) used were informed by prior potential studies (1, 3, 6, 7, 13). For each technology, we removed the Environmental Exclusion Categories from the techno-economic suitability map using raster geoprocessing in Python to create three Siting Levels (SL) of suitable areas that meet both techno-economic and environmental siting criteria.

In order to simulate potential project locations within suitable areas identified, we used MapRE Script Tool B-2, or the “project creation stage”, to create Candidate Project Areas (CPAs) by subdividing suitable areas into smaller, utility-scale project-sized areas. Solar potential project areas ranged from 2 km<sup>2</sup> to 9 km<sup>2</sup> (or about 30–270 MW), with the vast majority of solar CPAs designed to be 3 km<sup>2</sup> or to accommodate approximately 270 MW of solar capacity. Wind CPAs ranged from 2 km<sup>2</sup> to 25 km<sup>2</sup> (or about 6–70 MW), with the vast majority of wind CPAs designed to be 25 km<sup>2</sup> or to accommodate approximately 70 MW of wind capacity. We eliminated CPAs less than 2 km<sup>2</sup>, as these parcels would typically be considered too small for commercial utility-scale renewable energy development. To arrive at these capacity estimates per CPA we used the following land use efficiency factors: 2.7 MW/km<sup>2</sup> for onshore wind (14, 15), 30 MW/km<sup>2</sup> for solar PV, and 5.2 MW/km<sup>2</sup> for offshore wind (after reviewing the literature on offshore wind power density values, which are primarily based on wind farms in Europe (16)).

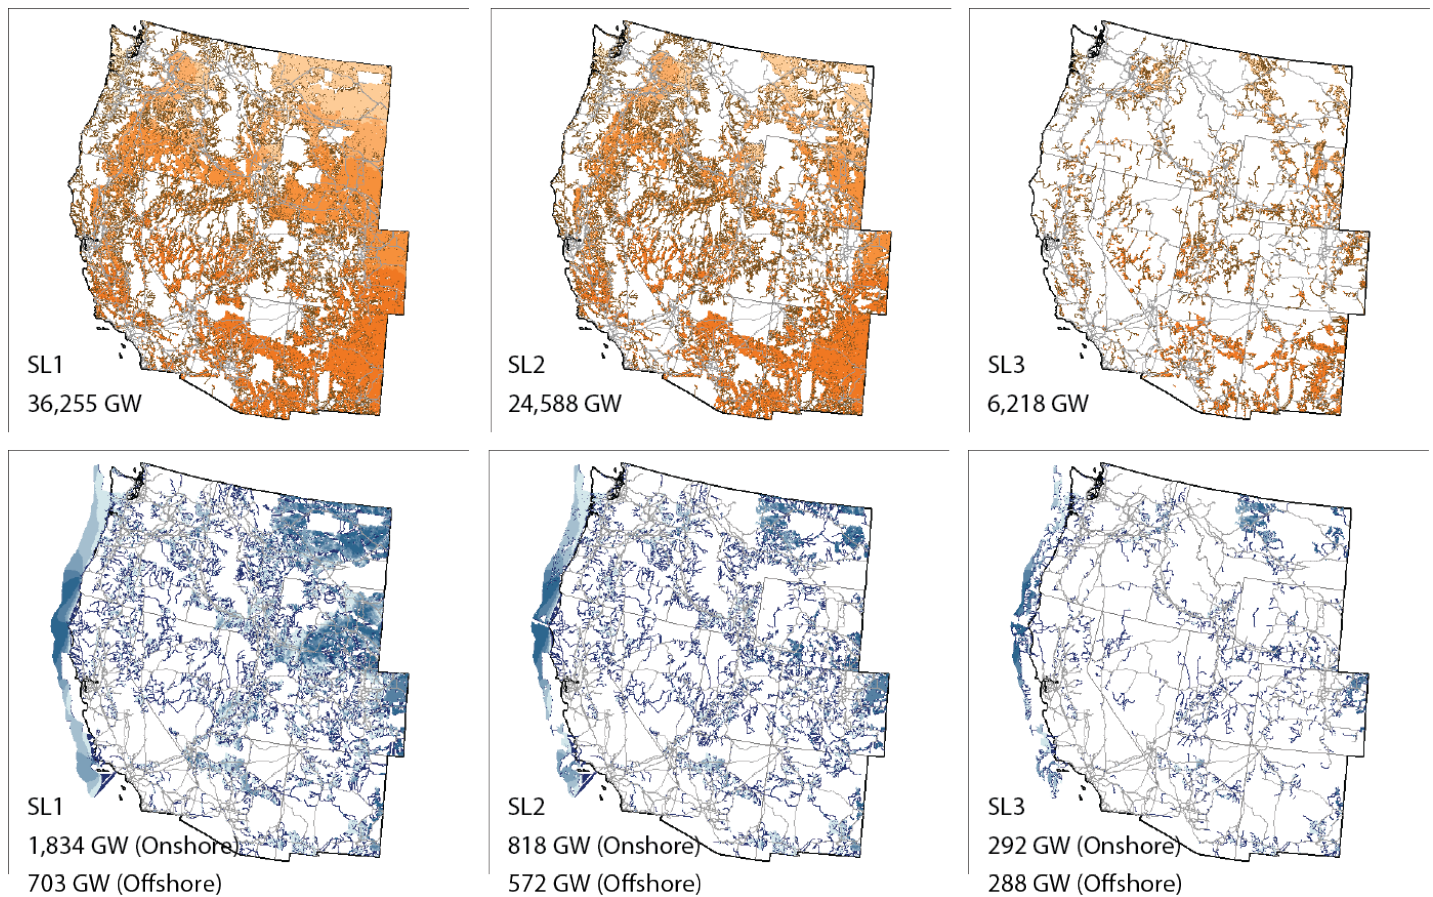

Fig. S3. Utility-scale Wind and solar Candidate Project Areas and spur lines

### B.2. Urban infill solar and rooftop PV.

**Rooftop PV assumptions** The high rooftop PV forecast for 2050 from the 2016 California Energy Commission’s Integrated Energy Policy Report (IEPR) (17) represents about 25.7% of technical potential, using NREL’s estimate for technical potential of rooftop PV in California of 128.9 GW (18). The IEPR high adoption forecast, which assumes both faster adoption rates and cost declines, as well as higher adherence to Title 24 (or that 90% of new houses built after 2020 install rooftop solar), is considered to be optimistic yet realistic. The independent 2018 [Distribution Working Group Forecast Report by Itron](#) corroborates the assumptions driving the IEPR forecast. We selected this value—25% of technical rooftop potential—as the



exogenous RIO input assumption for rooftop solar adoption in SL2, and decreased it by 10 percentage points to 15% for SL1, which has lower renewable capacity requirements, and increased it by 10 percentage points to 35% for SL3, which has more renewable capacity requirements and considered the environmentally preferred Siting Level.

**Urban infill assumptions** For the characterization of distributed solar resource potential within urban areas and densely populated areas, methods were consistent with Lopez et al (? ). Urban infill solar includes resource potential located in [urban areas](#), defined by the U.S. Census Bureau as densely developed territory, encompassing residential, commercial, and other nonresidential urban land uses. Two types of urban areas were included: urbanized areas (UAs) that contain 50,000 or more people and urban clusters (UCs) that contain at least 2,500 people. The goal was to identify candidate locations for ground-mount solar arrays within the boundaries of more densely populated areas. Within urban areas, locations with imperviousness  $\geq 1$  % (USGS NLCD) were assumed to represent buildings, roads, parking lots and other structures and these were therefore treated as an exclusion in site suitability analysis. Parks and landmarks (PAD-US), and wetlands, water bodies, and forested areas (USGS NLCD) were excluded as well. CPAs were designed to be 0.018 to 1 km<sup>2</sup> or to accommodate approximately 0.5-30 MW of solar capacity. See Fig. S4 for examples areas where urban solar infill CPAs have been identified.

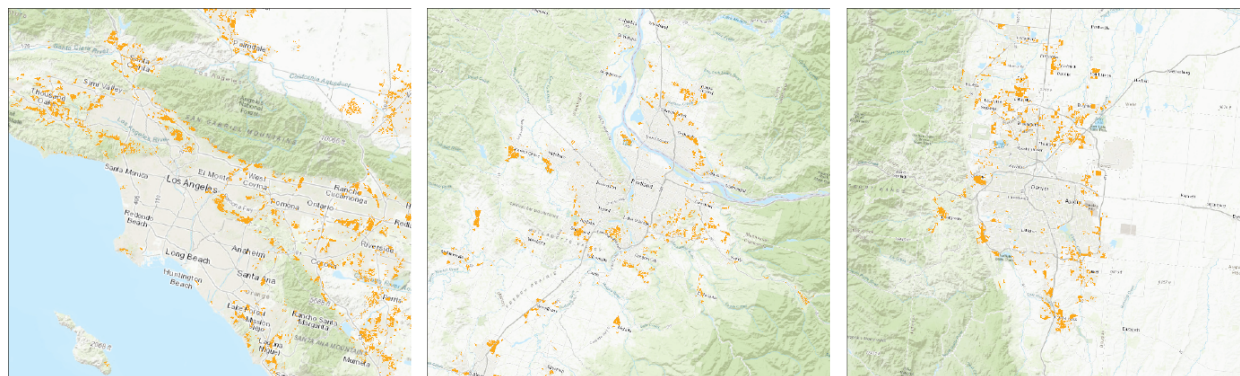

**Fig. S4.** Example urban infill solar Candidate Project Areas: 703 GW total

**B.3. Biomass assumptions.** We used the biomass supply curve from the 2016 Billion Ton Study (19) and modified it based on differing levels of sustainability of various feedstocks and where purpose-grown feedstocks are sourced (see Table S1). In Siting Level 1 (SL1), we included the entire, unmodified supply curve from BTS2016. In Siting Level 2 and 3 (SL2, SL3), we excluded all purpose-grown biomass (e.g., biomass sorghum, poplar, other planted whole trees) except miscanthus and switchgrass that can be grown on agricultural lands currently cultivating corn for corn ethanol. This follows the methods and assumptions originally developed by the Net Zero America study (20) and used in several of their scenarios. However, unlike NZA, we excluded the supply within conservation reserve program lands due to its conservation value. We additionally created a Limited Biomass scenario that limited biomass supply to just wastes and residues, thus excluding all miscanthus and switchgrass (Table S1). We note that because land sink accounting and biomass assumptions are not coupled within the same model (see Methods section in the main paper for a description of land sink calculations), the possible conversion of land for purpose grown biomass is not accounted for in land sink assumptions in SL1 (which may lead to an overestimate of the land sink) and the possible additional sequestration of a net contraction in land for purpose grown biomass is not accounted for in the Limited Biomass scenario (which may lead to an underestimate of the land sink).

**Table S1. Biomass assumptions for siting levels and sensitivities**

| Resource Form | Resource                           | Dry Tons | Siting Levels and sensitivities |              |                 |
|---------------|------------------------------------|----------|---------------------------------|--------------|-----------------|
|               |                                    |          | SL1                             | SL2 and SL3  | Limited biomass |
| Herbaceous    | Miscanthus                         | 253      | 1                               | Corn ethanol | 0               |
| Herbaceous    | Corn stover                        | 170      | 1                               | 0.62         | 0.62            |
| Herbaceous    | Switchgrass                        | 143      | 1                               | Corn ethanol | 0               |
| Herbaceous    | Biomass sorghum                    | 96       | 1                               | 0            | 0               |
| Woody         | Poplar                             | 54       | 1                               | 0            | 0               |
| Woody         | Willow                             | 26       | 1                               | 0            | 0               |
| Herbaceous    | Wheat straw                        | 22       | 1                               | 1            | 1               |
| Waste         | Plastics                           | 20       | 1                               | 0            | 0               |
| Woody         | Hardwood, upland whole trees       | 18       | 1                               | 0            | 0               |
| Waste         | Paper and paperboard               | 16       | 1                               | 1            | 1               |
| Woody         | Hardwood, lowland whole trees      | 13       | 1                               | 0            | 0               |
| Woody         | Other forest residue               | 13       | 1                               | 1            | 1               |
| Waste         | Textiles                           | 8        | 1                               | 1            | 1               |
| Woody         | Softwood, planted whole trees      | 8        | 1                               | 0            | 0               |
| Woody         | Softwood, natural whole trees      | 8        | 1                               | 0            | 0               |
| Waste         | Food waste                         | 8        | 1                               | 1            | 1               |
| Herbaceous    | Rice straw                         | 6        | 1                               | 1            | 1               |
| Woody         | Other forest thinnings             | 5        | 1                               | 1            | 1               |
| Herbaceous    | Cotton residue                     | 5        | 1                               | 1            | 1               |
| Woody         | Softwood, natural logging residues | 5        | 1                               | 1            | 1               |
| Waste         | Rubber and leather                 | 4        | 1                               | 1            | 1               |
| Herbaceous    | Energy cane                        | 4        | 1                               | 0            | 0               |
| Woody         | Secondary mill residue             | 4        | 1                               | 1            | 1               |
| Woody         | Softwood, planted logging residues | 4        | 1                               | 1            | 1               |
| Waste         | Yard trimmings                     | 4        | 1                               | 1            | 1               |
| Herbaceous    | Sugarcane bagasse                  | 4        | 1                               | 1            | 1               |
| Woody         | Hardwood, lowland logging residues | 4        | 1                               | 1            | 1               |
| Woody         | Hardwood, upland logging residues  | 4        | 1                               | 1            | 1               |
| Waste         | Noncitrus residues                 | 3        | 1                               | 1            | 1               |
| Woody         | Mixedwood logging residues         | 2        | 1                               | 1            | 1               |
| Woody         | Mixedwood whole trees              | 2        | 1                               | 0            | 0               |
| Herbaceous    | Cotton gin trash                   | 2        | 1                               | 1            | 1               |
| Waste         | Tree nut residues                  | 2        | 1                               | 1            | 1               |
| Waste         | Citrus residues                    | 2        | 1                               | 1            | 1               |
| Herbaceous    | Rice hulls                         | 2        | 1                               | 1            | 1               |
| Herbaceous    | Sorghum stubble                    | 1        | 1                               | 1            | 1               |
| Woody         | Eucalyptus                         | 1        | 1                               | 0            | 0               |
| Herbaceous    | Sugarcane trash                    | 1        | 1                               | 1            | 1               |
| Herbaceous    | Barley straw                       | 1        | 1                               | 1            | 1               |
| Woody         | Primary mill residue               | 0        | 1                               | 1            | 1               |
| Woody         | Pine                               | 0        | 1                               | 1            | 1               |
| Herbaceous    | Oats straw                         | 0        | 1                               | 1            | 1               |
| Waste         | Existing Uses                      | 30       | 1                               | 1            | 1               |
| Woody         | Existing Uses                      | 171      | 1                               | 1            | 1               |

**Table S2. Techno-economic datasets for site suitability modeling of onshore wind and utility-scale solar PV**

| Broad category            | Dataset name              | Source                                                                                                                                   | Website                                                                                                                                                                                                                                                                                                                                                                                                           | Description                                                                                                                                                                                                                              | Data type/ resolution                  | Threshold or buffer                                         |
|---------------------------|---------------------------|------------------------------------------------------------------------------------------------------------------------------------------|-------------------------------------------------------------------------------------------------------------------------------------------------------------------------------------------------------------------------------------------------------------------------------------------------------------------------------------------------------------------------------------------------------------------|------------------------------------------------------------------------------------------------------------------------------------------------------------------------------------------------------------------------------------------|----------------------------------------|-------------------------------------------------------------|
| Renewable resource        | NREL ReV model            | NREL                                                                                                                                     | <a href="https://www.nrel.gov/docs/fy19osti/73067.pdf">https://www.nrel.gov/docs/fy19osti/73067.pdf</a>                                                                                                                                                                                                                                                                                                           | Point locations of simulated wind speeds and estimated annual average capacity factors of quality wind resource areas in the U.S.                                                                                                        | CSV with geographic coordinates/ 2 km  | Include all areas                                           |
| Renewable resource        | Solar PV capacity factors | NREL                                                                                                                                     | <a href="https://sam.nrel.gov/">https://sam.nrel.gov/</a>                                                                                                                                                                                                                                                                                                                                                         | Point locations of estimated annual average capacity factors for fixed tilt solar PV calculated using SAM *                                                                                                                              | CSV with geographic coordinates/ 10 km | Include all areas                                           |
| Technical constraint      | Slope                     | CGIAR                                                                                                                                    | <a href="http://www.cgiar-csi.org/data/srtm-90m-digital-elevation-database-v4-1">http://www.cgiar-csi.org/data/srtm-90m-digital-elevation-database-v4-1</a>                                                                                                                                                                                                                                                       | Calculated slope in percentage from STRM digital elevation model - Resampled 250 m SRTM 90m Digital Elevation Database v4.1                                                                                                              | Raster/ 250m                           | Solar: exclude >10%, Wind: exclude >19%                     |
| Physical constraint       | Water bodies and rivers   | Argonne National Lab Energy Zones Mapping Tool                                                                                           | <a href="https://ezmt.anl.gov/">https://ezmt.anl.gov/</a>                                                                                                                                                                                                                                                                                                                                                         | Permanent water bodies in the U.S. (lakes and rivers)                                                                                                                                                                                    | Shapefile                              | Wind and solar: include areas >250m outside of water bodies |
| Socio-economic constraint | Census urban zones        | 2017 TIGER/ Line®                                                                                                                        | <a href="https://www.census.gov/geo/maps-data/data/tiger-line.html">https://www.census.gov/geo/maps-data/data/tiger-line.html</a>                                                                                                                                                                                                                                                                                 | Urban areas as defined by the U.S. Census                                                                                                                                                                                                | Shapefile                              | Solar: include areas >500m, Wind: include areas >1000m      |
| Socio-economic constraint | Population density        | ORNL Landscan                                                                                                                            | <a href="https://landscan.ornl.gov/">https://landscan.ornl.gov/</a>                                                                                                                                                                                                                                                                                                                                               | Persons per km <sup>2</sup>                                                                                                                                                                                                              | Raster/ 1km                            | Wind and solar: include areas <100 persons/km <sup>2</sup>  |
| Socio-economic constraint | Military areas            | FAA, Argonne National Lab Energy Zones Mapping Tool (EZMT) and West-wide wind mapping project (WWWMP)                                    | <a href="https://ais-faa.opendata.arcgis.com/datasets/0c6899de28af447c801231ed7ba7baa6_0?geometry=59.120%2C-23.069%2C-126.857%2C69.964">https://ais-faa.opendata.arcgis.com/datasets/0c6899de28af447c801231ed7ba7baa6_0?geometry=59.120%2C-23.069%2C-126.857%2C69.964</a> <a href="https://ezmt.anl.gov/">https://ezmt.anl.gov/</a> <a href="http://wwwmp.anl.gov/maps-data/">http://wwwmp.anl.gov/maps-data/</a> | Includes the following areas: Military Training Routes, Military Installations, Ranges, and Training Routes, DOD High Risk of Adverse Impact Zones, DOD Restricted Airspace and Military Training Routes, Utah Test and Training Range   | Shapefile                              | Solar: include areas >1000m, Wind: include areas >5000m     |
| Socio-economic constraint | Military areas            | Protected Areas Database–U.S.                                                                                                            | <a href="https://gapanalysis.usgs.gov/padus/">https://gapanalysis.usgs.gov/padus/</a>                                                                                                                                                                                                                                                                                                                             | Filtered PAD-US feature class using: Des_Tp = 'MIL'                                                                                                                                                                                      | Geodatabase feature class              | Solar: include areas >1000m, Wind: include areas >5000m     |
| Hazardous constraint      | Active mines              | USGS Active mines and mineral plans in the U.S.                                                                                          | <a href="https://mrdata.usgs.gov/mineplant/">https://mrdata.usgs.gov/mineplant/</a>                                                                                                                                                                                                                                                                                                                               | Mine plants and operations for commodities monitored by the National Minerals Information Center of the USGS. Operations included are those considered active in 2003 and surveyed by the USGS.                                          | CSV of geographic coordinates          | Wind and solar: include areas >1000m                        |
| Hazardous constraint      | Airports and runways      | National Transportation Atlas Database (NTAD) from the U.S. Department of Transportation (USDOT) and Bureau of Transportation Statistics | <a href="https://ezmt.anl.gov/">https://ezmt.anl.gov/</a>                                                                                                                                                                                                                                                                                                                                                         | The airports dataset including other aviation facilities is as of July 13, 2018, and is part of the U.S. Department of Transportation (USDOT)/Bureau of Transportation Statistics' (BTS)' National Transportation Atlas Database (NTAD). | Shapefile                              | Solar: include areas >1000m, Wind: include areas >5000m     |
| Hazardous constraint      | Special Use Airspace      | Federal Aviation Administration (FAA)                                                                                                    | <a href="https://hub.arcgis.com/datasets/dd0d1b726e504137ab3c41b21835d05b_0">https://hub.arcgis.com/datasets/dd0d1b726e504137ab3c41b21835d05b_0</a>                                                                                                                                                                                                                                                               | Effective Date: 2020. Route Airspace data is published every eight weeks by the U.S. Department of Transportation, Federal Aviation Administration-Aeronautical Information Services.                                                    | Shapefile                              | Solar: include areas >0m, Wind: include areas >0m           |
| Hazardous constraint      | Railways                  | National Transportation Atlas Database (NTAD) from the U.S.DOT and Bureau of Transportation Statistics                                   | <a href="https://ezmt.anl.gov/">https://ezmt.anl.gov/</a>                                                                                                                                                                                                                                                                                                                                                         | The Rail Network is a comprehensive database of North America's railway system at 1:24,000 to 1:100,000 scale as of May 25, 2018.                                                                                                        | Shapefile                              | Wind and Solar: include areas >250m                         |
| Hazardous constraint      | Flood zones               | National Flood Hazard (FEMA)                                                                                                             | <a href="https://www.fema.gov/flood-maps/products-tools/national-flood-hazard-layer">https://www.fema.gov/flood-maps/products-tools/national-flood-hazard-layer</a>                                                                                                                                                                                                                                               |                                                                                                                                                                                                                                          | Geodatabase feature class              | Wind and Solar: include areas >0m                           |

\* Solar PV capacity factor calculation assumptions for SAM: Ground Mount Single-Axis Tracking Configuration, DC/AC Ratio = 1.4, Average Annual Soiling Losses = 5%, Module Mismatch Losses = 2%, Diode and Connection Losses = 0.5%, DC Wiring Losses = 1%, AC Wiring Losses = 1%, Availability Losses = 1%, Degradation = 0.5% per year

**Table S3. Techno-economic datasets for site suitability modeling of offshore wind**

| Broad category            | Dataset name                           | Source                | Website                                                                                                                                                         | Description                                                                                                                                                                                     | Data type/ resolution | Threshold or buffer   |
|---------------------------|----------------------------------------|-----------------------|-----------------------------------------------------------------------------------------------------------------------------------------------------------------|-------------------------------------------------------------------------------------------------------------------------------------------------------------------------------------------------|-----------------------|-----------------------|
| Renewable resource        | WIND Toolkit dataset for offshore wind | NREL                  | <a href="https://cscdata.nrel.gov/#/datasets/3cb55fd7-57ec-418c-a8ba-181e4a2779b2">https://cscdata.nrel.gov/#/datasets/3cb55fd7-57ec-418c-a8ba-181e4a2779b2</a> | Point locations of simulated weibull parameters in the U.S./ 1-2 km                                                                                                                             | feature class         | Include all areas     |
| Socio-economic constraint | Submarine cables                       | Argonne National Labs | <a href="https://ezmt.anl.gov/">https://ezmt.anl.gov/</a>                                                                                                       | Polyline locations of submarine cables                                                                                                                                                          | shapefile             | Include areas > 250m  |
| Socio-economic constraint | Military Marine Danger Zones           | Argonne National Labs | <a href="https://ezmt.anl.gov/">https://ezmt.anl.gov/</a>                                                                                                       |                                                                                                                                                                                                 | shapefile             | Include areas > 5000m |
| Socio-economic constraint | Shipping lanes                         | NOAA                  | <a href="http://ftp.coast.noaa.gov/pub/MSP/ORT">http://ftp.coast.noaa.gov/pub/MSP/ORT</a>                                                                       | Select "THEMELAYER" In( 'Particularly Sensitive Sea Area', 'Shipping Fairways Lanes and Zones', 'Recommended Routes', 'Traffic Separation Schemes/Traffic Lanes', 'Traffic Separation Schemes') | shapefile             | Include areas > 250m  |
| Socio-economic constraint | Oil and gas wells                      | NOAA                  | <a href="http://ftp.coast.noaa.gov/pub/MSP/ORT">http://ftp.coast.noaa.gov/pub/MSP/ORT</a>                                                                       |                                                                                                                                                                                                 | shapefile             | Include areas > 250m  |
| Socio-economic constraint | Pipeline areas                         | NOAA                  | <a href="http://ftp.coast.noaa.gov/pub/MSP/ORT">http://ftp.coast.noaa.gov/pub/MSP/ORT</a>                                                                       |                                                                                                                                                                                                 | shapefile             | Include areas > 250m  |
| Technology criteria       | Bathymetry                             | NOAA                  | <a href="https://maps.ngdc.noaa.gov/viewers/grid-extract/index.html">https://maps.ngdc.noaa.gov/viewers/grid-extract/index.html</a>                             | Used to determine wind technology (fixed turbine in shallow water <50m depth, floating turbine in deep water >50m depth)                                                                        | shapefile             | N/A                   |

**B.4. Accounting for existing power plant footprints.** The results of the above site suitability modeling steps include maps of possible locations for wind and solar development. For many of these possible locations, however, there are wind and solar power plants that have already been constructed. Existing power plants must be removed from the CPAs and supply curve in order to ensure that the supply curve only contains undeveloped future candidate projects. By removing existing projects, we enable RIO to optimize future capacity expansion investment decisions and avoid overestimating the resource potential.

For existing wind facilities, we used a combination of the U.S. Wind Turbine Database (USGS USWTDB) and U.S. EIA 860 data (Table S15). The USGS wind turbines were grouped by facility name, and then a polygon was identified for each facility, using the "convex hull" technique. The resulting polygons outline the areas where turbines (points) share a facility name. A different approach was used to create polygons from the EIA data, which had facilities identified by a single point per facility. These points were buffered by a radius appropriate to ensure the resulting wind project polygon would have 2.7 MW/km<sup>2</sup> power density. Finally, we merged the buffered EIA and additional USWTD polygons to have a gap-filled existing wind turbine footprint dataset. These areas with existing wind turbines were removed from the candidate wind project areas.

For solar resource potential, we used the USGS national solar array footprint dataset (21) combined with the U.S. EIA dataset (Table S15), using the same methods as for wind. These existing solar facilities were removed from the candidate solar project areas.

### C. Step 3. Power line modeling.

**C.1. Overview.** Stage 3 was modeling of transmission lines and spur lines (i.e., gen-ties). The first step in both cases was developing cost and line routing surfaces using the environmental exclusion categories plus techno-economic data representing siting criteria such as slope, terrain, and wildfire risk. Multipliers based on this data were used to represent the relative difficulty and cost of power line siting over diverse terrains (Table S7). For inter-state transmission lines, substation start- and end-points in each state were selected (Fig. S6). This involved updating the initial corridor transmission capacities, identifying congestion levels, and determining the feasibility of upgrades, reconductoring, and new HVDC and HVAC lines (Table S4). Only one start- and end-point was assigned in each state, except for California, which due to its geographic size and demand, was divided into northern and southern zones. For spur lines, CPA locations and existing high voltage substations were selected as start- and end-points for individual project-related spur line builds. The interstate start- and end-points and routing surfaces were then entered into a GIS-based least-cost path tool to generate routes (Figs. S8 and S11). We made realistic estimates of the cost of each spur and inter-state transmission route using the cost surfaces and substation requirements based on transmission length, reflecting the actual developer costs and trade offs of long-distance transmission from remote resources to high-density load centers (Tables S5, S6, S8, S9, Fig. S7). Spur line costs, including the cost of interconnection, were then incorporated into the utility-scale wind and solar supply curves. Inter-state transmission lines were compiled into a lowest-cost ordered supply curve for each state-to-state corridor and passed to the energy models employed in the next stage. The following subsection describe each of these steps in detail.

**C.2. Inter-state transmission modeling.** We used a combination of transmission costing tools, environmental conservation and risk data, GIS tools and expert opinions to generate transmission corridors for use in the analysis. Figure S5 details the steps



followed to generate transmission corridors.

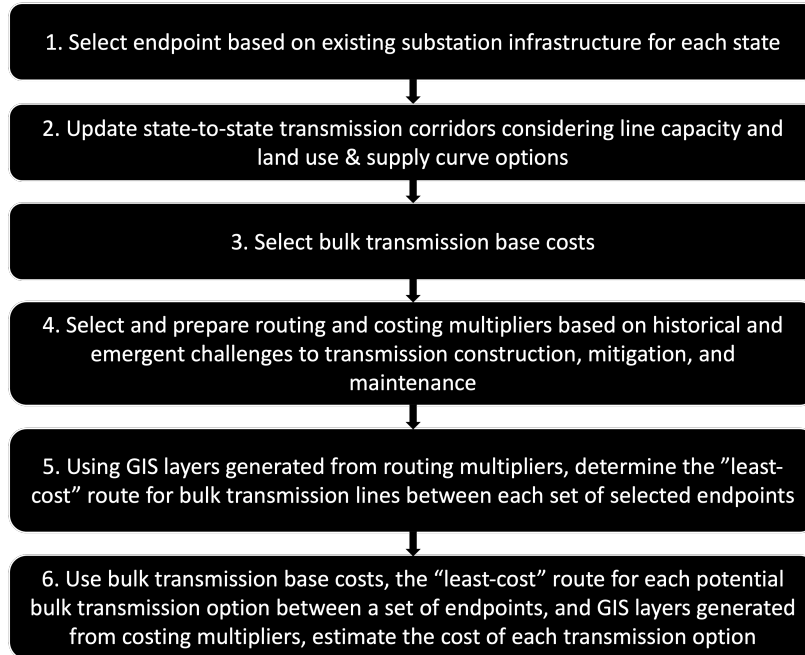

Fig. S5. Transmission modelling flow

**Substation selection** State representative substations were selected from the HIFLD (22) substation dataset by examining current intersection points of 230kV, 345kV and 500kV transmission lines and pinpointing a substation location in each state. We analyzed and compared the chosen substations to their knowledge of congested areas to validate the interconnection locations. Substation selection included consideration for capacities of existing grid infrastructure, (23), congestion analyses of that infrastructure (24), and expert opinion regarding typical modeling conventions for the western U.S. electric system. Large and widely separated load pockets in California led to the selection of two representative substations for California, while only one representative substation was selected for each of the remaining states. Figure S6 presents a map of those substations.

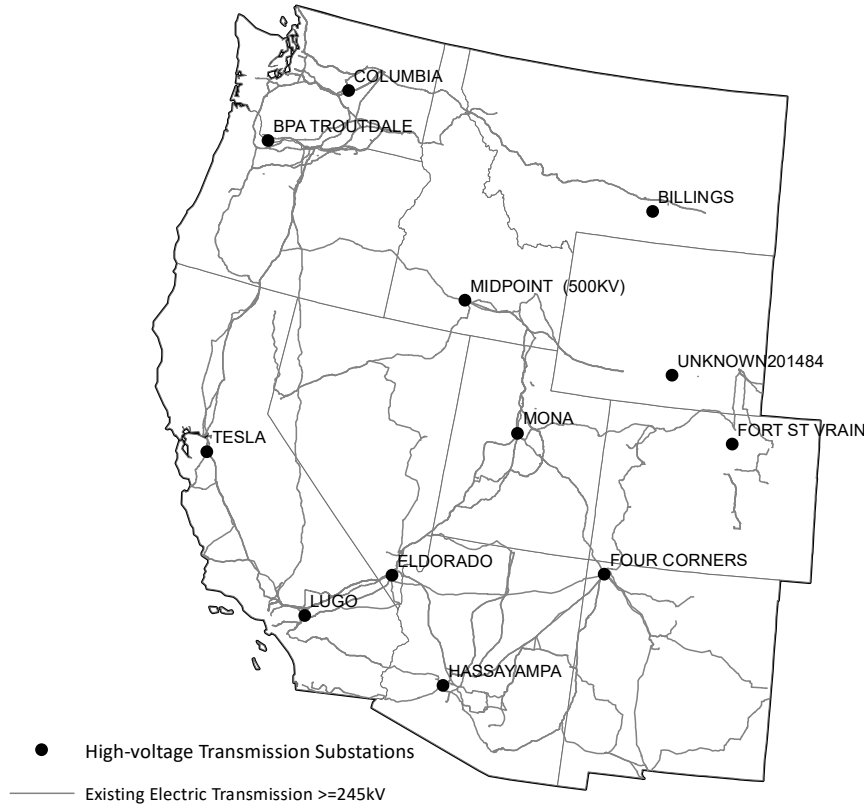

Fig. S6. Selected substations

**Update corridor capacities and Identify supply curve options** The transmission capacities for each state-to-state corridor in the RIO model were updated using WECC path rating studies (24) (25), OASIS, other reports (26) (27), and HIFLD (22) (28) data. Table S4 lists the 2020 corridor capacities along with the transmission supply options and maximum capacities allowed in each corridor.

Table S4. List of inter-state TX corridors, along with 2020 capacities and the supply options and availability (in MW) allowed

| Corridor                   | Flow / Counterflow capacity (MW) | Re-conductor 230kV (MW) <sup>1</sup> | Re-conductor 345kV (MW) <sup>2</sup> | Re-conductor 500kV (MW) <sup>4</sup> | Co-locate 500kV (MW) <sup>5</sup> | New 500kVd HVAC (MW) <sup>5</sup> | New 500kV HVDC (MW) <sup>5</sup> |
|----------------------------|----------------------------------|--------------------------------------|--------------------------------------|--------------------------------------|-----------------------------------|-----------------------------------|----------------------------------|
| arizona to new mexico      | 2400/2400                        | 0                                    | 1500                                 | 1500                                 | 3000                              | 3000                              | 3000                             |
| californiaS to arizona     | 3767/9600                        | 0                                    | 0                                    | 1500                                 | 3000                              | 3000                              | 3000                             |
| californiaS to californiaN | 4800/5400                        | 400                                  | 750                                  | 1500                                 | 3000                              | 3000                              | 3000                             |
| californiaN to nevada      | 150/160                          | 0                                    | 0                                    | 0                                    | 3000                              | 3000                              | 3000                             |
| californiaS to nevada      | 4100/7360                        | 800                                  | 750                                  | 6000                                 | 3000 <sup>3</sup>                 | 3000                              | 3000                             |
| californiaS to utah        | 1400/2400                        | 0                                    | 0                                    | 0                                    | 3000                              | 3000                              | 3000                             |
| idaho to montana           | 256/337                          | 400                                  | 0                                    | 0                                    | 3000                              | 3000                              | 3000                             |
| idaho to utah              | 1600/1250                        | 400                                  | 1500                                 | 0                                    | 3000                              | 3000                              | 3000                             |
| idaho to wyoming           | 4100/2400                        | 400                                  | 750                                  | 0                                    | 3000                              | 3000                              | 3000                             |
| montana to wyoming         | 400/2598                         | 800                                  | 750                                  | 1500                                 | 3000                              | 3000                              | 3000                             |
| nevada to arizona          | 4785/9600                        | 800                                  | 750                                  | 1500                                 | 3000                              | 3000                              | 3000                             |
| nevada to idaho            | 360/500                          | 0                                    | 0                                    | 0                                    | 3000                              | 3000                              | 3000                             |
| nevada to utah             | 485/500                          | 400                                  | 750                                  | 1500                                 | 3000                              | 3000                              | 3000                             |
| new mexico to colorado     | 664/1970                         | 400                                  | 750                                  | 0                                    | 3000                              | 3000                              | 3000                             |
| new mexico to californiaS  | 2325/0                           | 0                                    | 0                                    | 0                                    | 0                                 | 3000                              | 6000                             |
| oregon to californiaS      | 8010/4675                        | 0                                    | 0                                    | 0                                    | 3000                              | 3000                              | 3000                             |
| oregon to californiaN      | 8010/4675                        | 800                                  | 0                                    | 3000                                 | 3000                              | 3000                              | 3000                             |
| oregon to idaho            | 600/1500                         | 800                                  | 0                                    | 1500                                 | 3000                              | 3000                              | 3000                             |
| utah to arizona            | 265/300                          | 0                                    | 0                                    | 0                                    | 3000                              | 3000                              | 3000                             |
| utah to colorado           | 650/650                          | 0                                    | 750                                  | 0                                    | 3000                              | 3000                              | 3000                             |
| utah to new mexico         | 647/700                          | 400                                  | 750                                  | 0                                    | 3000                              | 3000                              | 3000                             |
| washington to idaho        | 1200/2400                        | 400                                  | 750                                  | 0                                    | 3000                              | 3000                              | 3000                             |

**Table S4. List of inter-state TX corridors, along with 2020 capacities and the supply options and availability (in MW) allowed**

| Corridor               | Flow / Counterflow capacity (MW) | Re-conductor 230kV (MW) <sup>1</sup> | Re-conductor 345kV (MW) <sup>2</sup> | Re-conductor 500kV (MW) <sup>4</sup> | Co-locate 500kV (MW) <sup>5</sup> | New 500kVd HVAC (MW) <sup>5</sup> | New 500kV HVDC (MW) <sup>5</sup> |
|------------------------|----------------------------------|--------------------------------------|--------------------------------------|--------------------------------------|-----------------------------------|-----------------------------------|----------------------------------|
| washington to montana  | 1350/2200                        | 400                                  | 0                                    | 1500                                 | 3000                              | 3000                              | 3000                             |
| washington to oregon   | 12000/12000                      | 1200                                 | 750                                  | 4500                                 | 3000                              | 3000                              | 3000                             |
| wyoming to californiaS | 0/0                              | 0                                    | 0                                    | 0                                    | 0                                 | 6000                              | 3000                             |
| wyoming to colorado    | 1605/1400                        | 400                                  | 750                                  | 1500                                 | 3000                              | 3000                              | 3000                             |
| wyoming to utah        | 1800/1600                        | 400                                  | 0                                    | 0                                    | 3000                              | 3000                              | 3000                             |

<sup>1</sup> base capacity addition per line = 400 MW

<sup>2</sup> base capacity addition per line = 750 MW

<sup>3</sup> only line under-grounded due to known lack of space above-ground for a co-location

<sup>4</sup> base capacity addition per line = 1500 MW

<sup>5</sup> base capacity addition per line = 3000 MW

<sup>6</sup> table entries containing a zero were not modelled

**Select transmission base costs** Base cost for each supply curve option were drawn from the Black & Veatch (B&V) “Transmission Line Capital Cost Calculator” (29) (23) initially created in the Western Electricity Coordinating Council transmission planning forums (TEPPC). Base transmission costs and the calculator settings used to generate base costs are listed in Table S5.

**Table S5. B&V Transmission cost calculator configuration and base costs**

| Configuration             | Re-conductor 230 kilovolt (kV)                               | Re-conductor 345kV                                           | Re-conductor 500kV                                           | Co-locate 500kV                                      | New 500kVd HVAC                                      | New 500kV HVDC                             |
|---------------------------|--------------------------------------------------------------|--------------------------------------------------------------|--------------------------------------------------------------|------------------------------------------------------|------------------------------------------------------|--------------------------------------------|
| Calculator configuration  | 230 kV double circuit, ACSR, Lattice, >10 miles, reconductor | 345 kV double circuit, ACSR, Lattice, >10 miles, reconductor | 500 kV double circuit, ACSR, Lattice, >10 miles, reconductor | 500 kV double circuit, ACSR, Lattice, >10 miles, new | 500 kV double circuit, ACSR, Lattice, >10 miles, new | 500 kV HVDC, ACSR, Lattice, >10 miles, new |
| Base cost in USD2018/mile | 664,127                                                      | 1,262,297                                                    | 2,131,048                                                    | 3,278,535                                            | 3,278,535                                            | 1,639,820                                  |
| ROW width in feet         | 150                                                          | 200                                                          | 250                                                          | NA                                                   | 250                                                  | 200                                        |

In order to finalize base transmission costs (without substations), right-of-way land lease costs are drawn from a BLM land cost layer added to all supply curve options in Table S5 except the co-locate option †. This process follows the implementation order and method detailed in the B&V Transmission cost calculator. Base substation costs and the calculator settings used to generate the base costs using the Black & Veatch (B&V) “Substation Capital Cost Calculator” (29) (23) are listed in Table S6.

**Table S6. B&V Substation calculator configuration and base costs**

| Parameter                                                                                   | 500kV HVAC                                                                                                      | 500kV HVDC                                                                                                                                         |
|---------------------------------------------------------------------------------------------|-----------------------------------------------------------------------------------------------------------------|----------------------------------------------------------------------------------------------------------------------------------------------------|
| Sub/converter station handling                                                              | minimum 2 substations (start and end), plus one every 100 miles (after first 200 miles)                         | minimum 2 substations(start and end), plus one every 400 miles (after first 400 miles) B&V calculator configuration for subconverter station costs |
| 500 kV Substation, New, Breaker and a Half, 6, no, 345/500 kV XFMR , 600, 4, 3, 1, 3, 0.175 | 500 kV Substation, New, Breaker and a Half, 4, 500 kV HVDC Converter , 345/500 kV XFMR , 750, 4, 3, 1, 3, 0.175 |                                                                                                                                                    |
| Sub/converter station cost in USD 2018                                                      | 87,942,834                                                                                                      | 654,486,168                                                                                                                                        |

**Select and prepare routing and costing multipliers** This section describes the routing and costing multipliers that were used in step 4 in inter-state transmission modeling (Figure S5). Essentially the study area is broken into 250 m grid cells, and each cell has an associated cost (in dollars per mile) to cross the terrain in that cell. The least cost path algorithm is used to identify the route connecting the two end points at minimal cost. Two different versions of the cost surface are used for routing vs. costing, and within each of these two surface types, there are multiple surfaces corresponding to different voltages. The routing and

† The GIS layer from BLM to which we have access, only has 10 (of 15) cost tiers implemented. If this study was iterated in the future it would ideally use a layer matching the 15 layers in the B&V transmission cost calculator.

costing multipliers that were selected for use in this study are listed in Table S7. At a high level, the cost multipliers are based on values identified in the WECC TEPPC transmission cost calculator (BV Calculator) and the CAISO PTO per-unit-cost guides (2020). As an example, if the base cost for a 230 kV transmission line is \$1 million per mile, and if a certain 250m grid cell contains forested terrain, with a multiplier of 2.25, then the cost of the line crossing that cell would be \$2.25 million per mile. Several modifications were made to account for terrain type variables not modeled in existing publicly available tools such as the B&V calculator. Modifications include adding new multipliers to account for areas with high wildfire risk, water bodies, and areas of high environmental conservation value.

**Table S7. Transmission routing multipliers**

| Multiplier           | GIS layer                                                | Use     | Criteria                                             | Value <sup>1</sup>           |
|----------------------|----------------------------------------------------------|---------|------------------------------------------------------|------------------------------|
| Terrain              | MRLCD (30)                                               | routing | Forested                                             | 2.25                         |
| Terrain              | MRLCD (30)                                               | routing | Urban                                                | 1.59                         |
| Terrain              | MRLCD (30)                                               | routing | Wetlands (and water) <sup>5</sup>                    | 1.20                         |
| Terrain              | MRLCD (30)                                               | routing | Desert/barren                                        | 1.05                         |
| Terrain              | MRLCD (30)                                               | routing | Scrubbed/Farmland/(& other) <sup>5</sup>             | 1.00                         |
| Slope                | USGS (31)                                                | routing | mountain (greater than 4 degrees)                    | 1.75                         |
| Slope                | USGS (31)                                                | routing | rolling hills (between 1 and 4 degrees)              | 1.40                         |
| Slope                | USGS (31)                                                | routing | flat (less than 1 degree)                            | 1.00                         |
| Environmental Risk   | The Nature Conservancy                                   | routing | Category 1                                           | 100 (TNC) <sup>3</sup>       |
| Environmental Risk   | The Nature Conservancy                                   | routing | Category 2                                           | 20 (TNC)                     |
| Environmental Risk   | The Nature Conservancy                                   | routing | Category 3                                           | 15 (TNC)                     |
| Environmental Risk   | The Nature Conservancy                                   | routing | No Category                                          | 1 (TNC)                      |
| Airports and Runways | EZMT [ref] [ref]                                         | routing | < 5km from either                                    | 100 (32)                     |
| Existing ROW         | HILFD (28)                                               | routing | New builds + in existing ROW                         | 9 (TNC) <sup>7</sup>         |
| Existing ROW         | HILFD (28)                                               | routing | Co-locate + outside existing ROW $\geq$ 230 kV       | 9 (TNC) <sup>7</sup>         |
| Existing ROW         | HILFD (28)                                               | routing | 230 kV reconductor + outside existing ROW = 230 kV   | 2.22 <sup>9</sup>            |
| Existing ROW         | HILFD (28)                                               | routing | 345 kV reconductor + outside existing ROW = 345 kV   | 1.82 <sup>9</sup>            |
| Existing ROW         | HILFD (28)                                               | routing | 500 kV reconductor + outside existing ROW = 500 kV   | 1.54 <sup>9</sup>            |
| Tower structure      | Population Density, USDOT (33)                           | both    | 230 kV + population density > 100 people/square mile | 1.1                          |
| Tower structure      | Population Density, USDOT (33)                           | both    | 345 kV + population density > 100 people/square mile | 1.3                          |
| Tower structure      | Population Density, USDOT (33)                           | both    | 500 kV + population density > 100 people/square mile | 1.5                          |
| Wildfire risk        | Risk to Potential Structures in USDA Forest Service (34) | both    | risk scaled <sup>6</sup>                             | 1 to 5 (TNC) <sup>2</sup>    |
| AFUDC and overhead   | continental US                                           | costing | All                                                  | 1.175                        |
| B&V Terrain/Slope    | USGS (31) MRLCD (30)                                     | costing | Forested                                             | 2.25                         |
| B&V Terrain/Slope    | USGS (31) MRLCD (30)                                     | costing | Mountain                                             | 1.75                         |
| B&V Terrain/Slope    | USGS (31) MRLCD (30)                                     | costing | Urban                                                | 1.59                         |
| B&V Terrain/Slope    | USGS (31) MRLCD (30)                                     | costing | Rolling hills                                        | 1.40                         |
| B&V Terrain/Slope    | USGS (31) MRLCD (30)                                     | costing | Wetland (& water) <sup>5</sup>                       | 1.20                         |
| B&V Terrain/Slope    | USGS (31) MRLCD (30)                                     | costing | Desert/barren land                                   | 1.05                         |
| B&V Terrain/Slope    | USGS (31) MRLCD (30)                                     | costing | Scrubbed/Farmland/(& other) <sup>5</sup>             | 1.00                         |
| Environmental Risk   | The Nature Conservancy                                   | costing | Category 1                                           | 1.2 (TNC) <sup>4</sup>       |
| Environmental Risk   | The Nature Conservancy                                   | costing | Category 2                                           | 1.1 (TNC) <sup>8</sup> (35)  |
| Environmental Risk   | The Nature Conservancy                                   | costing | Category 3                                           | 1.05 (TNC) <sup>8</sup> (35) |
| Environmental Risk   | The Nature Conservancy                                   | costing | No Category                                          | 1 (TNC) (35)                 |

| Multiplier | GIS layer | Use | Criteria | Value <sup>1</sup> |
|------------|-----------|-----|----------|--------------------|
|------------|-----------|-----|----------|--------------------|

<sup>1</sup> All values are drawn from B&V tool (23) (29) unless otherwise marked

<sup>2</sup> Our multiplier value for fire risk areas is based on the idea that in order to limit fire risk during operation of the TX lines, the lines would be fire hardened or undergrounded in areas with the highest fire risk. We have capped this multiplier at 5x, which is above the 3.07 – 4.17 x undergrounding multiplier implied by the costs of undergrounding a 66 – 115 kV line according to a California ISO participating transmission owner in 2020 (36) <sup>‡</sup>, but is on the lower end of the 3x to 10x multipliers implied by a 2013 undergrounding study from the Edison Electric Institute (37). <sup>§</sup>

<sup>3</sup> An exception has been made in the routing and costing layers at points where existing transmission right-of-ways cross long and continuous layers – specifically the scenic and historic trails layer within the CAT1 surface. We have removed all CAT1 environmental penalties at such crossings, so that transmission additions/upgrades will use existing crossings.

<sup>4</sup> For possible edge cases where the only route is through a Category 1 exclusion, we have used a 1.2x multiplier.

<sup>5</sup> This was done in part to allow mapping of terrain multipliers onto the selected terrain dataset which contains land categories not included in the B&V calculator, as well as classifies a “Water” category separate from the “Wetlands”.

<sup>6</sup> See discussion below table

<sup>7</sup> A multiplier of 9x was chosen arbitrarily, to make existing ROW routing “cost” higher than most multiplier ‘stacks’ in a surface. For “new” lines, this drives the least-cost-path algorithm away from existing lines, to seek a new path connecting two endpoints. For “co-located” lines, this drives the least cost path algorithm to stay within existing right-of-way. Only when faced with larger multiplier stacks on nearby land parcels will a new transmission path enter an existing ROW with a 9x multiplier, or will an upgrade in an existing transmission corridor deviate from that corridor due to the 9x multiplier on surrounding land parcels.

<sup>8</sup> We increased the WECC mitigation study costs by one order of magnitude due to this text in the report, “In terms of mitigation costs, the study concentrates on a handful of line-item mitigation costs. These capture only a portion of the overall environmental costs of a project. [...] The study, therefore, does not factor in project costs associated with routing alternatives, specialized construction techniques, or the permitting phase—all of which may result in costs that are an order of magnitude greater than those represented in the study.” (35, p 43)

<sup>9</sup> The purpose of these multipliers is to allow the least cost path algorithm to jump “gaps” in existing lines of a certain voltage for reconductoring. For example, if a reconductor path can follow an existing 230 kV line for 150 out of 200 mi between two endpoints, but the remainder of the existing line between these two endpoints does not have voltage information or is of a different voltage, then this multiplier would be applied to this segment to encourage the least cost path to follow this existing line anyway. These multiplier values are derived from the difference between new builds and reconductor costs for each voltage level. Due to limited representation of the full extent of higher voltage networks in the dataset used to map existing transmission (22), these multipliers were decreased to allow other multipliers more importance when crossing ‘missing’ portions of existing transmission networks. When a more accurate layer showing existing transmission becomes available, these multipliers can be increased to the same values used for new builds and co-located lines.

**Routing modifications** Modification of the Black & Veatch (B&V) tool (29) (23) for routing purposes involves altering and adding to the multipliers listed in the tool. Alterations included the following:

- Adding a tower structure adjustment multiplier as a GIS layer in order to apply the B&V calculator “Tubular Steel” multiplier based geospatial information. The “Tubular Steel” tower multipliers vary for each voltage class:
  - 230 kilovolt (kV): 1.1x [B&V default]
  - 345 kV: 1.3x [B&V default]
  - 500 kV: 1.5x [B&V default]
- Moving the slope related multipliers from the terrain section into their own slope type multiplier. This was done for:
  - Flat (<2% Slope, < 1 degree): 1.00 x [B&V default/assumed]
  - Rolling Hills (2-8% Slope, 1 to 4 degree): 1.40 x [B&V default]
  - Mountain (>8% Slope, > 4 degree): 1.75 x [B&V default]
- Keeping terrain multipliers at their default B&V values, and adding a “water” and “all other type” multipliers.<sup>3</sup>
  - Forested 2.25 x [B&V default]
  - Scrubbed 1.00 x [B&V default]
  - Wetland 1.20 x [B&V default]
  - Farmland 1.00 x [B&V default]
  - Desert/barren land 1.05 x [B&V default]
  - Urban 1.59 x [B&V default]
  - Water (if not designated as wetlands) 1.20 x [assumed] <sup>¶</sup>
  - All other types 1.00 x [assumed]
- Adding environmental risk routing multipliers for exclusion categories. Environmental routing multipliers are intended to reflect preference not to allow energy development projects in environmentally sensitive areas (Category 1, Category 2, Category 3) under different scenarios. For transmission routing we have decided to use high multipliers for all three categories in order to eliminate or minimize the distances over which lines are routed in environmentally sensitive areas.
  - Category 1- routing 100 x [off limits]

<sup>¶</sup> As some rivers appear to be part of the “Water”, rather than “Wetlands” category in the selected terrain dataset (30), this category was given the same multiplier as the wetlands category. If we find transmission lines cross open bodies of water like Lake Tahoe, then this handling would need to be revised.

- (b) Category 2- routing 20 x [assumed]
  - (c) Category 3- routing 15 x [assumed]
  - (d) No category - routing 1 x [assumed]
5. Although techno-economic exclusion zones have been used to limit renewable resource project siting within a buffered distance of railroad corridors, active mine sites, airports, airport runways, areas with high population densities or steep inclines, flood zones, military areas of consideration; many of these areas also often contain high voltage transmission lines. In this analysis, we have only treated airports and airport runways, each buffered with a 5km radius, as techno-economic exclusion zones for transmission. These techno-economic exclusion zones have been given a routing multiplier of 100x.
  6. Various multipliers are applied to either encourage or discourage following of right-of-ways (ROW) in the following circumstances:
    - (a) For reconducted lines with portions missing at the relevant voltage, environmental multipliers are only applied outside of ROWs having a voltage of 230kV or greater.
    - (b) For co-located lines, we have allowed co-location in all ROWs having a voltage of 230 kV or greater. For routing purposes, we minimize the deviation of co-location builds from ROWs by increasing costs outside of ROWs. <sup>||</sup> For co-located lines with portions missing in the selected ROW dataset, environmental multipliers are only applied during transmission routing, and then only outside of ROWs having a voltage of 230kV or greater
    - (c) For all new lines, we use environmental routing and costing multipliers over the entire surface, including in ROWs. <sup>\*\*</sup> In order to bias new builds away from existing ROWs during the routing step of the process, we use new line base costs for all areas outside of existing ROWs, and 9x new line base costs at the same voltage inside of ROWs.
  7. Wildfire and environmental risk layers are additional multipliers, and the B&V transmission cost calculator base terrain/slope multipliers are allowed to 'stack' on top of Wildfire and environmental risk multipliers. We based the addition of a fire risk multiplier on the potential for a transmission line to start a fire during its operation and cause damage to the habitats or neighborhoods they cross. Our multiplier value for fire risk areas reflects the idea that in order to limit fire risk during operation of the TX lines, the lines would be fire hardened or undergrounded in areas with the highest fire risk. We have capped this multiplier at 5x, which is above the 3.07 – 4.17 x undergrounding multiplier implied by the costs of undergrounding a 66 – 115 kV line according to a California ISO participating transmission owner reported costs in 2020 (26) <sup>††</sup>, but is on the lower end of the 3x to 10x multipliers implied by a 2013 undergrounding study from the Edison Electric Institute (37). <sup>‡‡</sup> The general method for scaling an underlying wildfire risk raster (RR) to our capped fire risk multiplier is shown below:

$$1 + (\text{maximum of undergrounding / fireHardening multiplier} - 1) * RR / (\text{maximum}(RR))$$

This scaling method translates to areas with low fire risk having a multiplier of 1x. As fire risk increases, the fire risk multiplier increases from 1x to a maximum of 5x. This does not make high wildfire hazard areas off-limits for transmission siting, but suggests that transmission routes seeking to pass through a high wildfire hazard potential area would likely need to pursue fire-hardening measures (e.g. ROW widening, increased monitoring and maintenance facilities, or undergrounding) in proportion to the risk of starting a wildfire during operation.

**Costing modifications** Modification of the Black & Veatch (B&V) tool (29) (23) for costing purposes involves altering and adding to the multipliers listed in the tool. Alterations included the following:

1. Keeping all terrain multipliers at their default B&V values and adding “water” and “all other types” multipliers. <sup>§§</sup>
  - (a) Forested 2.25 x [B&V default]
  - (b) Mountain 1.75 x [B&V default]
  - (c) Urban 1.59 x [B&V default]
  - (d) Rolling Hills 1.40 x [B&V default]
  - (e) Wetland 1.20 x [B&V default]

<sup>||</sup> We use new line base costs inside ROWs and use 9x new line base costs at the same voltage outside of ROWs. A multiplier of 9x is chosen arbitrarily but is aimed at being higher than most multiplier stacks in cost surface, while allowing some deviation when warranted by a large cost multiplier stack. For example, a deviation from an existing ROW might occur when the least-cost path algorithm is comparing a 9x multiplier outside of a ROW with a 11.25x multiplier in a ROW running through an area that is forested (2.25x) and is at high risk for wildfires (5x).

<sup>\*\*</sup> An exception has been made in the routing and costing layers at points where existing transmission right-of-ways cross long and continuous layers – specifically the scenic and historic trails layer within the CAT1 surface. We have removed all CAT1 environmental penalties at such crossings.

<sup>††</sup> Only one of six participants – SCE – provided costs which could be used to develop a multiplier. Undergrounding costs were provided for rural/desert and metropolitan areas at 66 kV and 110 kV lines. This is a lower voltage than the 230 kV lines being mapped/costed here for spur-lines, which is one argument for making an underground cost multiplier higher than is suggested by SCE costs.

<sup>‡‡</sup> The study does not provide costs for different high voltage transmission levels but notes the wide variations in costs (and implied multipliers) arises from the large variation in costs of transmission at different voltage levels.

<sup>§§</sup> This was done in part to allow mapping of terrain multipliers onto the selected terrain dataset (30), which contains land categories not included in the B&V calculator, as well as classifies a “Water” category separate from the “Wetlands”.



- (f) Water (if not designated as wetlands) 1.20 x [assumed] ¶¶
- (g) Desert/barren land 1.05 x [B&V default]
- (h) Scrubbed & farmland 1.00 x [B&V default]
- (i) All other types 1.00 x [assumed]

2. Adding environmental risk cost multipliers for TNC selected exclusion categories. Environmental cost multipliers have been implemented for instances where Category 1, Category 2, and Category 3 areas were encroached on despite disincentives created by high routing multipliers. Cost multipliers are intended to provide reasonable environmental mitigation costs over short distances in such cases. Cost were drawn from a WECC study (5), and inflated one order of magnitude from the 0.5% and 1% multipliers recommended in the WECC study. \*\*\*

- (a) Category 1 - costing 1.20 x [assumed] †††
- (b) Category 2 - costing 1.10 x [derived from (5)]
- (c) Category 3 - costing 1.05 x [derived from (5)]
- (d) No category - costing 1.00 x [derived from (5)]

3. Using a 1.20x multiplier for techno-economic exclusions (see the footnote on the Category 1 – costing multiplier).

4. Using same fire risk and tower structure adjustment multipliers as in routing process

5. Remove ROW capital costs for co-located projects

6. Add a 5x multiplier for complete/partial undergrounding of long-distance transmission lines.

**Determine least-cost route, and use least-cost route to estimate capital cost** This section describes steps 5 and 6 in Figure S5, (determine least-cost route, and use least-cost route to estimate the capital cost of each line).

Transmission routing was implemented by combining transmission base costs with routing multipliers in order to generate a routing surface (Base cost \* all routing multipliers but AFUDC/overhead + ROW land cost) \* AFUDC/overhead multiplier), and then using the ArcGIS least cost path as polyline tool (38) to determine the route of each interstate transmission connection with a supply availability of greater than zero in Table S4.

The cost of each transmission option was then determined by repeating the prior processing using costing multipliers instead of routing multipliers (Base cost \* all costing multipliers but AFUDC/overhead + ROW land cost) \* AFUDC/overhead multiplier) and constraining transmission paths to the pre-routed options determined in the last step. In a final step, substation costs were added to the cost of each new transmission line using the parameters shown in Table S6. We applied a 5x multiplier to the co-located 500 kV line on the southern California to Nevada corridor to imply its undergrounding - it will go from being the first choice in the supply curve for that corridor, to the second to last choice. The 500 kV TX line crosses a zone with a >500x multiplier (is CAT1 - 100x, fire risk - 5x) for 250 meters. This is because the selected southern California substation is located in a CAT1 zone and quite congested.

Although ideally mapping and costing would be integrated in the process, there are a number of barriers to integration. For the current analysis, mapping will precede costing, and will generally reflect a combination of designed and available policy and economic inputs into line siting. Also note that neither WECC's "capital-cost" modeling tool (29) (23) nor this study factors in the project costs associated with routing alternatives, specialized construction techniques, or the permitting phase - all of which may result in costs that are an order of magnitude greater than those represented in the study.

¶¶ As some rivers appear to be part of the "Water", rather than "Wetlands" category in the selected terrain dataset (30), this category was given the same multiplier as the wetlands category. If we find transmission lines cross open bodies of water like Lake Tahoe, then this handling would need to be revised.

\*\*\* One order of magnitude was applied due to this text in the report, "In terms of mitigation costs, the study concentrates on a handful of line-item mitigation costs. These capture only a portion of the overall environmental costs of a project. The list of measures included in Attachment A were not intended to include costs associated with avoidance and minimization, which WECC's "capital-cost" modeling tool is assumed to capture. The study, therefore, does not factor in project costs associated with routing alternatives, specialized construction techniques, or the permitting phase—all of which may result in costs that are an order of magnitude greater than those represented in the study." (5, p. 43)

††† For possible edge cases, we have used a 1.2x multiplier instead making these fully off-limits in costing. This arises from the expedient choice to process at 250m rather than higher resolution, which means the path costing/mapping may occasionally incorrectly choose a Cat 1 cell rather than the adjacent intended non-Cat 1 cell. In order to allow this line to complete during the costing phase, the Cat 1 cell needs a multiplier assigned to it.

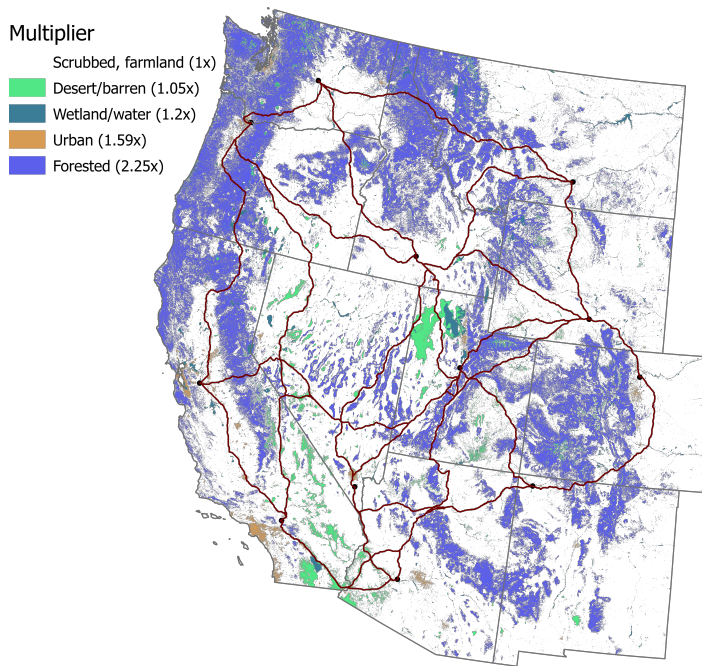

Fig. S7. Least cost path model results showing selected cost surface multipliers and new 500 kV transmission lines.

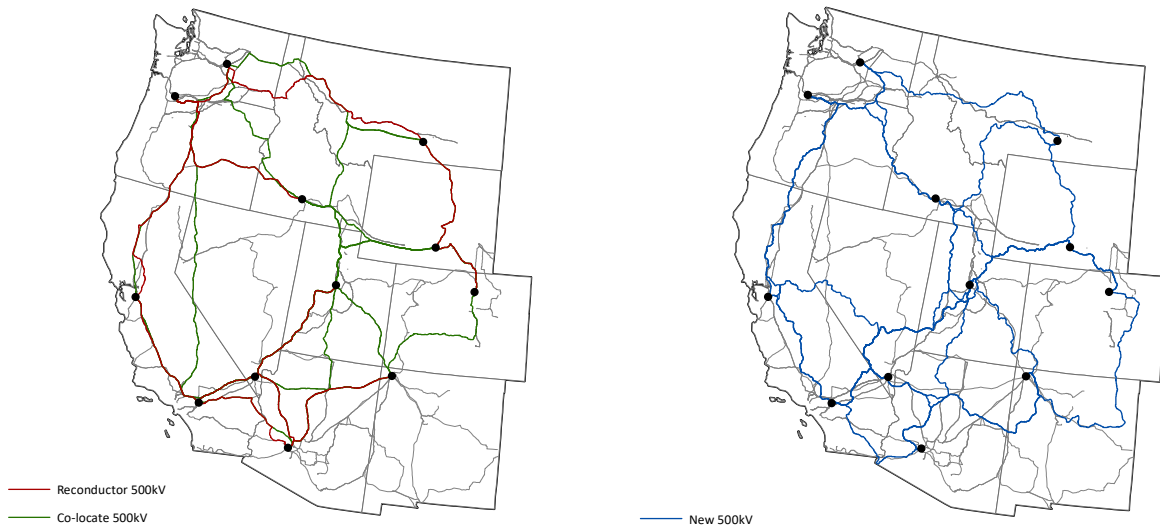

Fig. S8. Least cost path model results showing 500 kV transmission lines. Left: recondored and co-located 500 kV lines only. Right: new 500 kV lines only. )

**C.3. Spur line modeling.** We used a combination of transmission costing tools, environmental conservation and risk data, GIS tools and expert input to generate spur lines for each candidate project area (CPA) in the analysis. Figure S9 details the steps to generating transmission corridors.

**Choose spur line characteristics** Spur lines connect CPAs to existing transmission features. We chose to connect spur lines to the existing transmission network at the geographic location of the closest existing substations. We did not determine whether there was unused capacity at each selected substation, but rather chose to build a new substation for each CPA connection to ensure integration of new renewables meeting a threshold of 500MW. An additional assumption was made that land could be found to site the substation in the vicinity of an existing substation (recent experience in the western USA suggests that land restrictions, congestion and space limitations at existing substations lead to grid-tie connection point at alternate locations where new substations are constructed).

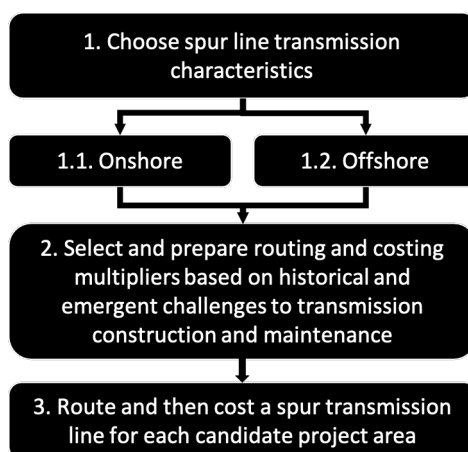

Fig. S9. spur line modelling flow

**Onshore** We selected the spur line characteristics shown in Table S8 to parameterize the Black & Veatch (B&V) transmission and substation cost calculators for onshore spur lines (29) (23).

Table S8. Spur line parameters for line and substation cost estimates

| Parameter                     | Setting                                                                                          |
|-------------------------------|--------------------------------------------------------------------------------------------------|
| Voltage class                 | 230 kV                                                                                           |
| Number of circuits            | single                                                                                           |
| Conductor type                | ACSR                                                                                             |
| Tower structure               | lattice (adjusted later to pole using GIS population density layer (33))                         |
| Line length                   | > 10 miles (expedient simplification)                                                            |
| Build type                    | new                                                                                              |
| Right-of-way (ROW) width      | 125 feet                                                                                         |
| Include land costs for ROW    | yes                                                                                              |
| AFUDC/Overhead costs          | 17.5% (implemented as a GIS multiplier layer)                                                    |
| Substation handling           | one substation for all lines, plus one additional substation for every 161 km after first 161 km |
| Circuit breaker type          | breaker and a half                                                                               |
| Number of Line/XFMR positions | 2                                                                                                |
| HVDC Converter                | no                                                                                               |
| Transformer type              | 115/230 kV                                                                                       |
| MVA rating per transformer    | 200                                                                                              |
| Number of transformers        | 1                                                                                                |
| SVC MVAR rating               | 1                                                                                                |
| Shunt reactor MVAR rating     | 1                                                                                                |
| Series capacitor MVAR rating  | 1                                                                                                |

Parameterization of the Black & Veatch (B&V) transmission and substation cost calculators with the settings in Table S8, leads to base spur line costs of 572,843 USD<sub>2018</sub> per km, and base substation costs of 7,609,776 for a spur line serving a CPA with a nameplate capacity of less than 200 MW, and having a spur length of less than 161 km. For CPA's with capacities greater than 200 MW, one additional transformer was added for each additional 200 MW of capacity. For CPA's with capacities greater than 400 MW, but less than 800 MW, the base spur line cost was multiplied by 1.6 to reflect the use of a double rather than a single circuit 230 kV transmission line, and two additional line/XFMR positions were added in the substation calculator. Table S9 summarizes the multipliers applied to base spur line, substation and right-of-way (ROW) costs for CPAs with capacities greater than 200 MW.

ROW land lease costs are added to each CPA's spur line following the same process described in the transmission methods section.

**Table S9. Multipliers applied to base spur line and substation costs for CPAs with capacities greater than 200 MW**

| Parameter                  | 200 to 400 MW | 400 to 600 MW | 600 to 800 MW |
|----------------------------|---------------|---------------|---------------|
| Spur line cost multiplier  | 1             | 1.6           | 1.6           |
| Substation cost multiplier | 1.24          | 2.22          | 2.46          |
| ROW width/cost multiplier  | 1             | 1.2           | 1.2           |

**Offshore** After exploring recent studies on offshore wind in California (39) and New York (40), we selected the National Renewable Energy Lab’s Annual technology Baseline from 2020 (ATB2020) (41) as the main source for offshore wind spur line costs. In light of known gaps in the documentation on transmission for offshore wind projects that accompanies the ATB2020, we chose a simple approach to the costing of spur lines serving offshore wind CPAs. Under this approach, we ran a linear regression on a plot of the ATB2020 offshore wind transmission costs per kW against the ATB2020’s corresponding average transmission distance (see Fig S10). After determining the distance of each CPA’s offshore wind transmission run in a later step, the equation arising from the linear regression will be used to determine its cost.

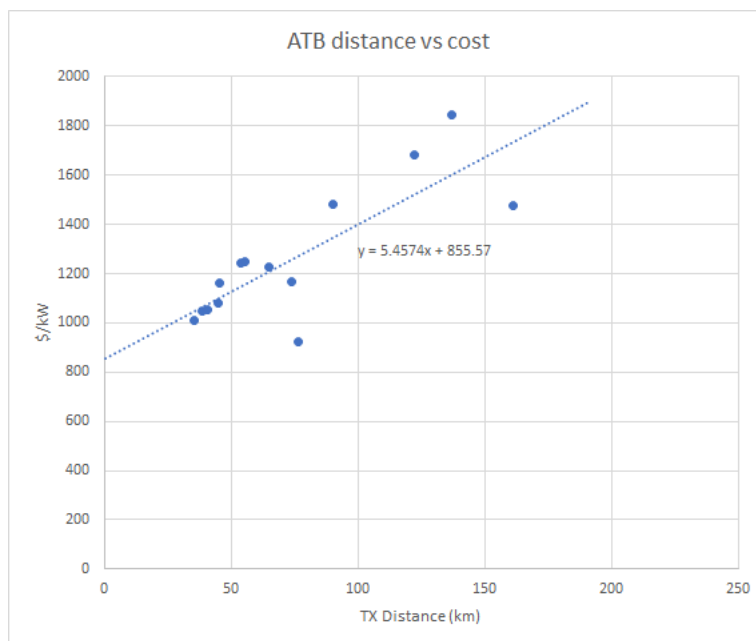

**Fig. S10.** Linear regression on plot of the ATB2020’s offshore wind transmission costs per kW against the ATB2020’s corresponding average transmission distance

The key assumption underlying this method based solely on the ATB2020 and final routed transmission distance is that the offshore wind transmission costs reported in the ATB2020 include all onshore transmission costs plus the costs of all relevant AC substations and DC converters.

**Select and prepare routing and costing multipliers (spur lines)** The routing and costing multipliers that were selected for use in this study are listed in Table S7 in the transmission methods section.

**Route and cost spur lines**

Following the same method as with the high voltage transmission lines, spur line routing was implemented by combining parameterized spur line costs with routing multipliers in order to generate a routing surface (Base cost \* all routing multipliers but AFUDC/overhead + ROW land cost) \* AFUDC/overhead multiplier), and then using the ArcGIS least cost path as polyline tool (38) to determine the route of each spur line to the nearest substation having a voltage rating equal to 230 kV (115 or 230 kV for offshore).

The cost of each onshore spur line option was then determined by repeating the prior processing using costing multipliers instead of routing multipliers (Base cost \* all costing multipliers but AFUDC/overhead + ROW land cost) \* AFUDC/overhead multiplier) and constraining spur lines to the pre-routed options determined in the last step. Sub/converter station costs were added to the cost of each new onshore spur line using the parameters shown in Tables S8 and S9.

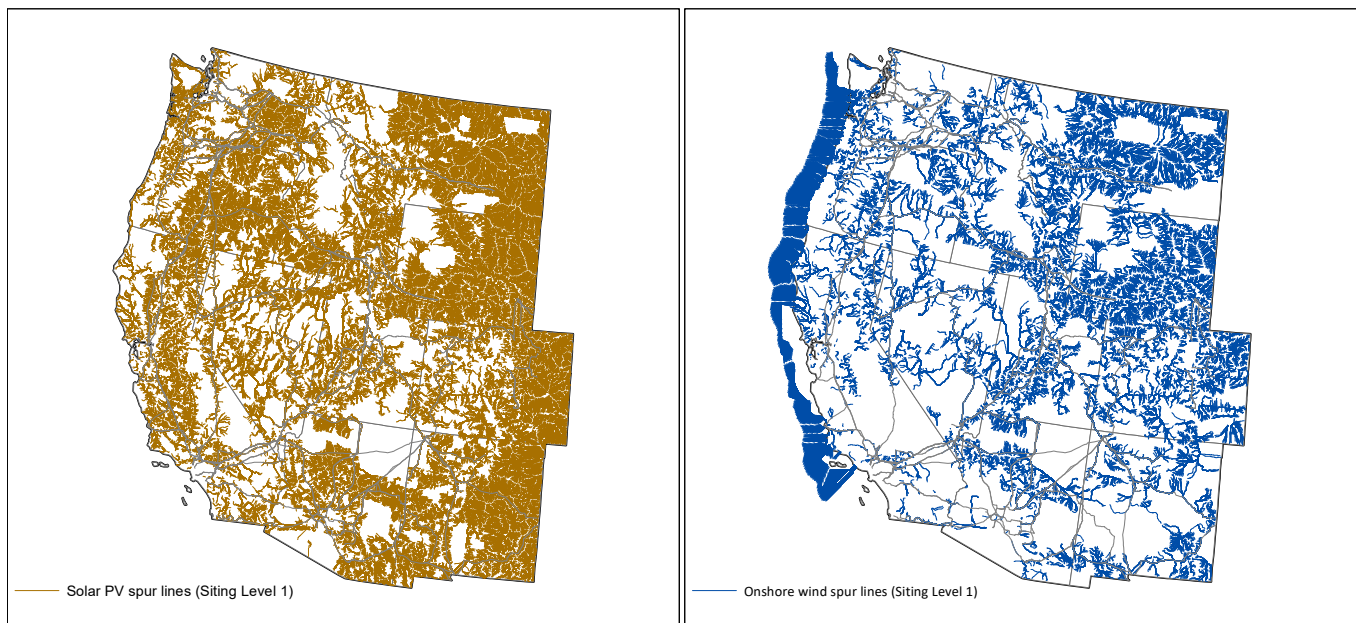

Fig. S11. Least cost path model results showing wind and solar interconnection spur lines. )

**D. Step 4. Energy modeling.** Two models, EnergyPATHWAYS (EP) and RIO, were used to develop the energy portfolios for the different scenarios, and to analyze the effects on portfolios and costs of the different Siting Levels. The energy modeling methodology is consistent with that used in Williams et al. (42). EP is a detailed stock-rollover accounting model that tracks infrastructure stocks, energy demand by type, and cost in every year for all energy-consuming technologies, as new stocks replace old stocks over time (for example, battery electric vehicles replacing internal combustion engine vehicles). EP divides the demand for energy services into 64 different subsectors with service demand forecasts taken primarily from the Energy Information Agency's (IEA) 2019 Annual Energy Outlook (AEO). Near-term adjustment factors based on 2020 IEA data were used to approximate the impacts of the COVID-19 pandemic. Time-varying electricity and fuel demand outputs from EP were then input into RIO, a linear programming model that combines capacity expansion with sequential hourly operations over a sampling of representative days to find the lowest-cost solution for decarbonized energy supply. Both EP and RIO were run using 12 geographic zones representing each of the western states plus a zone representing the rest of the U.S., which served as a boundary condition in the analysis.

The energy system modeling included multiple scenarios that reached net-zero greenhouse gas emissions economy-wide in the 11 western states, plus a reference scenario based on the AEO, and two scenarios that reached net-zero in the electricity sector only. The economy-wide net-zero scenarios were designed to represent different net-zero policy choices or technology uncertainties, and to study how each of these interacted with different levels of ecosystem protections (Table 1). We developed net-zero targets for the Western states energy system using boundary conditions for ecosystem carbon estimates and EPA non-CO<sub>2</sub> supply curves. Non-energy carbon emissions and energy carbon emissions are modeled separately. We ran the Land Use and Carbon Scenario Simulator (LUCAS) model (43) to estimate the net emissions from the land sector (including all land cover change but excluding activities within the agricultural sector) with and without expanded reforestation efforts. Reforestation resulted in 33 Mt of carbon sequestration by 2050. The EPA supply curves for non-CO<sub>2</sub> emissions mitigation are used to assume a certain level of non-CO<sub>2</sub> emissions reduction at <\$1000/tonne (Table S19). With this emissions accounting (Table S19), a total of 50 Mt in offsetting emissions were left unspecified to reach net-zero within the western US. However, the modeling approach achieves net zero emissions nationally by 2050, which is most consistent with political targets. If the Western region was to reach net-zero emissions within its geographic boundaries, some combination of additional negative emissions (DAC, BECCS), greater mitigation of non-CO<sub>2</sub> emissions, or further enhancement of the land sink would be necessary. In this case, because most of the land-sink is in the Eastern U.S. while the western U.S. has a disproportionate share of non-CO<sub>2</sub> emissions, sharing of carbon targets across the entire U.S. would allow achievement of net-zero emissions. Thus, while the western states are 50 Mt shy of net-zero in the energy modeling, the level of mitigation is still consistent with reaching net-zero at a national level assuming proportional allocation of sinks and sources. This outcome is more efficient than assuming an additional 50 Mt of direct air capture in the Western states, which was the modeling alternative.

On the demand-side, the key scenario dimension tested was the rate of electrification. The High Electrification case assumed that a 100% sales share of key electrification technologies in transportation, buildings, and industry was achieved by 2040 while the Slow Electrification case delayed the achievement of this saturation point by 20 years, to 2060. Previous studies have emphasized the importance of rapid electrification to reaching net-zero (42), so the high electrification assumption was common across the remaining scenarios. These scenarios differed on supply-side assumptions, which tested the effect of changing



renewable generation shares (cost-optimized in High Electrification case, constrained in Limited Wind and Solar, and used exclusively in Renewables Only). Other supply-side variations included greater or lesser resource sharing between states, and greater or lesser use of purpose-grown bioenergy crops (Table 1). Key RIO outputs include differences in energy portfolios and net cost of alternative scenarios compared to the High Electrification case.

**D.1. Creating supply curves from candidate project areas.** In the Stage 2 methodology above, the process of creating candidate project areas (CPAs) was outlined. To reduce the number of decision variables in the capacity expansion problem, we cluster the CPAs for each resource type based on capacity factor and transmission interconnection cost. Together these dimensions impact a project’s levelized cost of energy (LCOE) and likelihood of inclusion in the least-cost energy system. Clustering by both capacity factor and interconnection cost gives better performance than clustering on starting LCOE alone because different rates of technological learning along the cost and performance dimensions (e.g., wind capacity factor) will otherwise cause LCOE to drift apart in future years.

A k-means squared clustering algorithm was selected because it makes it possible to select the number of bins and because it keeps variance within each cluster fairly constant. The number of bins selected within each technology type was based on expert judgement as well as some iteration within the capacity expansion modeling. A visualization of the binning for onshore wind and solar PV can be seen in Fig. S12. Each dot represents a different CPA (the size of each CPA varies and is not visualized) and the colors represent the assigned bin. Wind and solar cost and performance inputs into the capacity expansion modeling are the weighted average of all the CPAs in a bin and the total potential the sum of all the CPAs. Bin cost and performance definitions were kept consistent between siting levels but with a different total potential. This is most easily visualized in bin 4 for onshore wind where the number of CPAs is clearly reduced moving from Siting Level 1 to Siting Level 3.

From Fig. S12 the impact of pre-filtering CPAs based on an initial LCOE screen can also be seen. The purpose of these screens was to remove projects that would not get chosen in a least-cost solution while allowing the remaining bins to be grouped more tightly, reducing error from the binning process as a whole. More stringent LCOE criteria were applied to solar than wind because the sheer number of available solar CPAs meant it was not necessary to entertain projects with higher cost and still have plenty of projects available. For example, Siting Level 3 still has 4.5 TW of solar potential available while excluding any project with an interconnection cost exceeding \$375/kW. The capacity expansion modeling in this scenario chose a maximum of 563 GW from this supply curve. As a result of the plentitude of solar, and as is typical in this type of exercise [See NREL Annual Technology Baseline], the number of bins selected for wind technologies (8 for onshore, 6 for offshore) exceed that for solar (5 total).

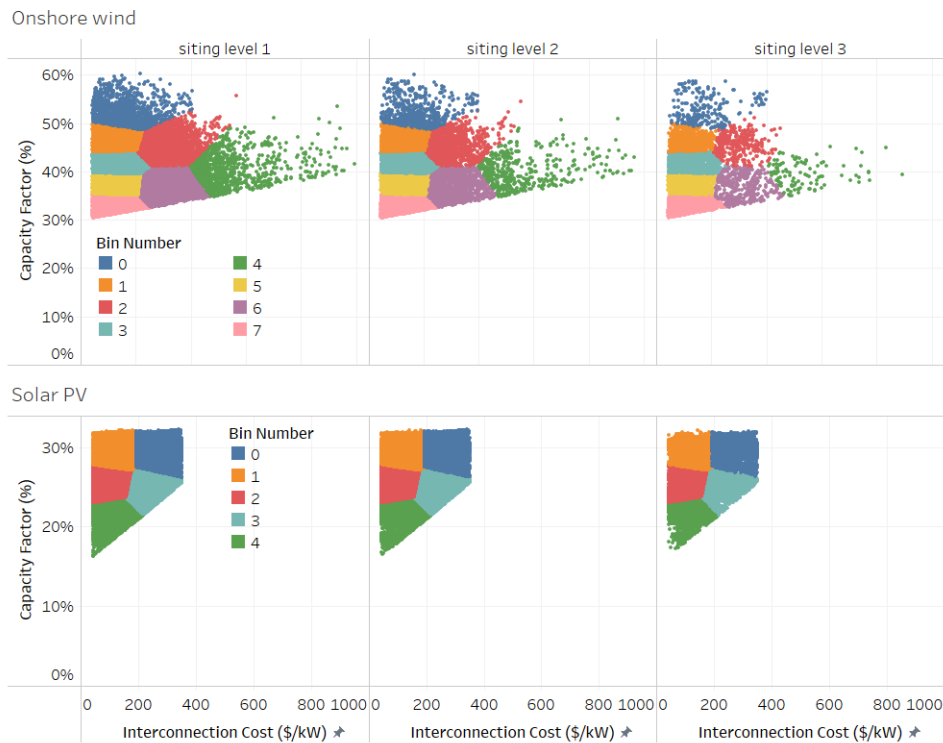

Fig. S12. k-means clustering results showing the bins for each technology and Siting Level.

**D.2. Scenarios.** The analysis combines six net zero energy cases with three levels of environmental siting constraints to create a total of 12 net zero economy-wide scenarios. For comparison, we included two electricity-only cases that only meets a net



zero target within the electricity sector coupled with SL1 and one reference case coupled with SL1 that does not have any emissions targets. These siting constraints were coupled with different biomass availability constraints, based on the amount of land allotted for purpose-grown biomass (Table S10), and applied to onshore wind, offshore wind, large-scale solar, interstate transmission, and spur lines that interconnect wind and solar projects to transmission.

**E. Stage 5. Downscaling and land use estimates.** In this stage, we downscaled RIO portfolios for onshore wind, offshore wind, utility-scale solar, urban infill solar, transmission lines, and spur lines. As a key output of the RIO model, each portfolio’s annual energy generation by technology is reported at the state level (and by resource class bin for certain technologies). The goal of downscaling is to model the physical build-out of these portfolios by identifying or selecting specific locations where infrastructure projects could or are likely to be sited. The RIO model selected an amount of generation from each state. This spatial downscaling step is necessary because land and ocean use impacts vary by location, and historically, developers choose sites based on multiple criteria, making some sites more likely to be developed than others. Modeling the possible spatially-specific build-out enables us to then assess some of the environmental impacts and social implications of each portfolio (Stage 6), thus enabling us to compare portfolios by impacts in addition to their costs.

**E.1. Onshore wind and utility-scale solar.** We downscaled onshore wind and utility-scale solar using the following three approaches: total levelized cost of electricity (generation and transmission), random forest regression, and logistic regression. The random forest and logistic regression approaches integrate more factors into the downscaling process than levelized cost alone by extrapolating historic siting trends based on multiple factors, including locations of existing wind and solar farms and siting criteria such as distance to the nearest substation, capacity factor, and land value.

**Random forest and logistic regression** Random forest and logistic regression are both classification approaches. Random forest is considered a machine learning approach based on decision trees and is primarily used for prediction. Logistic regression is a standard statistical approach for binary classification and is often used for understanding explanatory variables. We used these two approaches for creating a prediction or probability map for future onshore wind and solar farms based on existing wind and solar farm locations in the 11 western states and various explanatory variables (Table S11). Both methods require a response variable that captures where solar or wind power plants do and do not exist—otherwise known generally as presence and absence locations. We generated these pseudo-absence “background” locations by randomly sampling points from within the CPAs for Siting Level 1 (after removing the footprints of existing wind or solar farms), which represent locations where wind or solar farms could be sited but are not currently sited.

Because some siting criteria (explanatory variables)—substation, transmission lines, roads, and population—vary over time, we limited our analysis to existing power plants built in or after 2018 within the 11 western states and used explanatory variable datasets representing the year 2017 (Table S11). Because solar farms are represented as point locations, we first buffered each point using a radius that would result in a land use factor of 30 MW/km<sup>2</sup>. We also limited solar farms to those with installed capacities greater than or equal to 20 MW as a rough indicator of utility-scale, ground mounted, and grid-connected. For wind, point locations represent individual turbines and an attribute indicates turbines that form a particular power plant. We buffered each turbine using a 1.2 km radius and dissolved polygons by power plant name or EIA plant code. For turbines missing plant names or EIA codes, we grouped turbines into power plants based on spacing between turbines greater than 2 km.

We ran multiple regressions and selected the covariates in Table S12 based on the best logistic regression model with minimal degree of collinearity (using the lowest AIC score). We then generated prediction scores for each grid cell in the WECC study area. We spatially averaged the prediction scores within each CPA for each technology. To select CPAs that meet RIO portfolio results for each scenario and year, we sorted CPAs by prediction score (highest to lowest) within each resource bin for each state, calculated the cumulative generation, and selected the CPAs with cumulative generation sufficient to meet the generation target for each RIO portfolio in a given year.

**Table S11. Explanatory variables in random forest and logistic regression**

| Variable                               | Source                                                                                                                                                        | Notes                                                                                                                       |
|----------------------------------------|---------------------------------------------------------------------------------------------------------------------------------------------------------------|-----------------------------------------------------------------------------------------------------------------------------|
| Environmental score                    | See Tables S17 - S19                                                                                                                                          | Environmental exclusion categories 1-3 were given scores of 3-1, respectively and combined into a single raster             |
| BLM land value                         | Black and Veatch transmission land value                                                                                                                      |                                                                                                                             |
| Roads                                  | Census TigerLine 2017                                                                                                                                         | Used only secondary roads                                                                                                   |
| Slope                                  | See Table S2                                                                                                                                                  |                                                                                                                             |
| Population density                     | LandScan 2017; See Table S2                                                                                                                                   |                                                                                                                             |
| Substations                            | Ventyx - 2017                                                                                                                                                 | selected substations with maximum voltage >= 120 kV                                                                         |
| Transmission lines                     | Ventyx - 2017                                                                                                                                                 | selected lines with voltage >= 120 kV                                                                                       |
| Capacity factor                        | See section B.1                                                                                                                                               |                                                                                                                             |
| Renewable Portfolio Standard or target | <a href="https://www.ncsl.org/research/energy/renewable-portfolio-standards.aspx">https://www.ncsl.org/research/energy/renewable-portfolio-standards.aspx</a> | Selected the earliest target                                                                                                |
| Existing wind farm locations           | US Wind Turbine Database                                                                                                                                      | Selected only turbines built in or after 2018 and with total wind farm installed capacities >= 5 MW (or unknown capacities) |
| Existing solar farm locations          | EIA                                                                                                                                                           | Selected only turbines built in or after 2018 and with rated capacities >= 20 MW                                            |

Table S10. Descriptions of cases, environmental Siting Levels, and scenarios

| Descriptions of Cases and Environmental Siting Levels |                        | Scenarios: combinations of Cases and Siting Levels                                                                                                                                                                                                                                                                                                                                                                                                                                                                                                                                                                                                         |     |     |
|-------------------------------------------------------|------------------------|------------------------------------------------------------------------------------------------------------------------------------------------------------------------------------------------------------------------------------------------------------------------------------------------------------------------------------------------------------------------------------------------------------------------------------------------------------------------------------------------------------------------------------------------------------------------------------------------------------------------------------------------------------|-----|-----|
|                                                       |                        | SL1                                                                                                                                                                                                                                                                                                                                                                                                                                                                                                                                                                                                                                                        | SL2 | SL3 |
| <b>Economy-wide Cases</b>                             | High Electrification   | Demand: high energy efficiency, 100% sales of electric building technologies by 2040, 100% ZEV sales by 2040, fuel switching for some process heat and other fuel use, Direct Reduced Iron-making (DRI), which uses hydrogen and electricity instead of coal, carbon capture on cement<br>Supply: all generation technologies allowed                                                                                                                                                                                                                                                                                                                      |     |     |
|                                                       | Renewables Only        | Demand: Same as high electrification<br>Supply: no fossil fuel or nuclear usage by 2050                                                                                                                                                                                                                                                                                                                                                                                                                                                                                                                                                                    |     |     |
|                                                       | Slow Electrification   | Demand: high energy efficiency, 100% sales of electric building technologies by 2060, 100% ZEV sales by 2060, 20-year delay in fuel switching for process heat, other fuel use, and DRI in iron and steel. Carbon capture on cement<br>Supply: all generation technologies allowed                                                                                                                                                                                                                                                                                                                                                                         |     |     |
|                                                       | Limited Biomass        | Demand: Same as high electrification<br>Supply: no purpose grown biomass by 2050                                                                                                                                                                                                                                                                                                                                                                                                                                                                                                                                                                           |     |     |
|                                                       | Limited Wind and Solar | Demand: Same as high electrification<br>Supply: Annual onshore wind and large-scale solar build limited to peak historic rates in the western states (1.5 GW/year for wind; 3 GW/year for solar)                                                                                                                                                                                                                                                                                                                                                                                                                                                           |     |     |
|                                                       | In-State               | Demand: Same as high electrification<br>Supply: Lower reliability value placed on imports, no new long-distance transmission lines, higher transmission wheeling charges                                                                                                                                                                                                                                                                                                                                                                                                                                                                                   |     |     |
| <b>Comparison cases</b>                               | Electricity Only (HE)  | Demand: high electrification case electricity demand (demand for fuels is outside of system boundaries)<br>Supply: Electricity system only, net-zero emissions constraint in 2050                                                                                                                                                                                                                                                                                                                                                                                                                                                                          |     |     |
|                                                       | Electricity Only       | Demand: reference electricity demand (demand for fuels is outside of system boundaries)<br>Supply: Electricity system only, net-zero emissions constraint in 2050                                                                                                                                                                                                                                                                                                                                                                                                                                                                                          |     |     |
|                                                       | Reference              | Demand: existing energy efficiency, low electrification of buildings, 10% EV adoption, no industry electrification<br>Supply: all generation technologies allowed                                                                                                                                                                                                                                                                                                                                                                                                                                                                                          |     |     |
| <b>Environmental Siting Levels</b>                    | Siting Level 1 (SL1)   | Wind and solar: Exclude legally protected areas (Category 1; eg., national parks, wilderness areas, wildlife refuges, conservation easements)<br>Biomass: all feedstocks                                                                                                                                                                                                                                                                                                                                                                                                                                                                                   |     |     |
|                                                       | Siting Level 2 (SL2)   | Wind and solar: Exclude administratively protected areas (Category 2; e.g., critical habitat for threatened and endangered species, wetlands, areas of critical environmental concern) and Category 1.<br>Biomass: No net expansion of land for purpose-grown herbaceous biomass crops. Land for purpose-grown biomass is restricted to land that is currently used to grow bioenergy feedstocks. Specifically, land available for herbaceous biomass crops (miscanthus and switchgrass) is limited to the share of land currently cultivated for corn that is eventually consumed as corn ethanol, which is phased out in all net zero scenarios by 2050. |     |     |
|                                                       | Siting Level 3 (SL3)   | Wind and solar: Exclude areas with High Conservation Value (Category 3; e.g., priority and crucial habitat, intact grasslands, prime farmlands), Category 2 and Category 3.<br>Biomass: Same as Siting Level 2.                                                                                                                                                                                                                                                                                                                                                                                                                                            |     |     |

**Table S12. Logistic regression results**

|                                       | <i>Dependent variable:</i>  |              |
|---------------------------------------|-----------------------------|--------------|
|                                       | Solar                       | Onshore wind |
| Environmental score                   | -0.586*                     | -1.502***    |
|                                       | (0.349)                     | (0.535)      |
| BLM land rental rates                 | 0.0004                      | 0.001        |
|                                       | (0.0004)                    | (0.001)      |
| Distance to nearest road              | -0.0001**                   | -0.0001      |
|                                       | (0.0001)                    | (0.00005)    |
| Slope                                 | -0.454***                   | -0.041       |
|                                       | (0.135)                     | (0.074)      |
| Population density                    | 0.007                       | 0.121        |
|                                       | (0.022)                     | (0.173)      |
| Capacity factor solar                 | 0.318***                    |              |
|                                       | (0.109)                     |              |
| Capacity factor wind                  |                             | 33.192***    |
|                                       |                             | (6.161)      |
| Distance to nearest transmission line | -0.00001                    | -0.0001***   |
|                                       | (0.00002)                   | (0.00003)    |
| Distance to nearest substation        | -0.0001***                  | 0.00001      |
|                                       | (0.00002)                   | (0.00002)    |
| RPS target                            | 0.452                       | 3.485        |
|                                       | (1.934)                     | (2.251)      |
| Constant                              | -5.787**                    | -11.806***   |
|                                       | (2.700)                     | (2.506)      |
| Observations                          | 223                         | 147          |
| Akaike Inf. Crit.                     | 128.153                     | 115.672      |
| <i>Note:</i>                          | *p<0.1; **p<0.05; ***p<0.01 |              |

**Estimation of LCOE** This section describes the Levelized Cost of Energy (LCOE) calculation. LCOE is calculated for each CPA (Masters 2004). The calculation is done on a matrix basis, to incorporate location-specific annual energy production and capital cost for each CPA).

$$LCOE = \text{annualPayments} / \text{annualGeneration}$$

Where:

$$\text{AnnualPayments} = \text{ProjectCapitalCost} \times CRF(0.04, 20)$$

CRF, or annual capital recovery factor, is a function of interest rate (assumed here to be 4%) and loan term (assumed here to be 20 years, resulting in CRF = 0.0736)

$$LCOE = (\text{ProjectCapitalCost} \times CRF) / \text{AnnualGeneration}$$

Attributes for each CPA are calculated as follows:

$$CPACapitalCost = \text{GenerationCapitalCost} + \text{TransmissionCapitalCost}$$

$$\text{GenerationCapitalCost}(\$) = \text{NameplateCapacity (MW)} \times \text{GenericTechnologyCapitalCost} (\$/\text{MW, varies by region})$$

Transmission capital cost for each CPA is determined based on least-cost-path identification for interconnection spur lines to the nearest substation with voltage 230 kV or above. Spur line cost includes both line and substation cost.

$$\text{AnnualGeneration (MWh)} = \text{NameplateCapacity} \times 8760 \text{ (hrs/yr)} \times \text{CapacityFactor} (\%)$$

$$\text{NameplateCapacity (MW ac)} = \text{ShapeArea (km}^2\text{)} \times \text{PowerDensity (MW ac/km}^2\text{, varies by technology)}$$

*CapacityFactor* was estimated previously, as described in Stage 2: Renewable Resource Assessment.

In the LCOE-based approach, the selected portfolio is assigned to specific locations in each zone, incrementally up to the needed amount (annual MWh) to satisfy the portfolio, in order of increasing LCOE. However, we determined that results were similar enough between logistic regression and random forest, and that these two approaches were improvements upon the LCOE-based approach to warrant only reporting results using the random forest method.

**E.2. Offshore wind.** For offshore wind, sites were selected based on total levelized cost, since there are no existing offshore wind farms along the western US coastline. The LCOE-based approach for downscaling offshore wind is similar to that for onshore wind and utility-scale solar; however for offshore wind, siting is prioritized in BOEM-designated offshore wind leasing and planning areas.

**E.3. Power lines.** Spur lines are selected corresponding to the portfolio’s selected CPAs (utility-scale solar, onshore and offshore wind). High-voltage transmission line features are selected corresponding to the portfolio’s transmission upgrade specifications. High-voltage interzonal transmission lines are displayed as discrete line segments, and routes are identified based on the least-cost path analysis described in previous sections. Lines were selected based on applying minimum build thresholds to the capacities selected by RIO in each scenario (Table SS13). Routes shown in map figures are not intended to be prescriptive, but indicative of the potential magnitude of transmission network upgrades that could be needed to accommodate the level of west-wide renewable resource-sharing included in the portfolio.

**Table S13. Minimum capacity (MW) thresholds for downscaling transmission**

|           | Reconductor | Co-locate | New line |
|-----------|-------------|-----------|----------|
| 230 kV    | 50          | NA        | NA       |
| 345 kV    | 100         | NA        | NA       |
| 500 kV AC | 150         | 250       | 250      |
| 500 kV DC | 150         | 250       | 250      |

**E.4. Land use estimates for other technologies.** We did not downscale other infrastructure projects (energy generation or carbon sources)—geothermal, nuclear, natural gas, hydropower, direct air capture (DAC)—either due to the limited land area requirements (e.g. nuclear, DAC, geothermal) or because there is little to no expansion of the technology across the majority of the core scenarios (e.g., natural gas, hydropower). Biomass land area requirements for certain feedstocks can be significant, but since nearly all purpose grown biomass resources are sourced from the Midwest and south—outside of the states in the Western interconnection, downscaling biomass resources would largely be outside of the geographic scope and thus scope of this study. Instead, for other infrastructure projects, we report just the land area requirements using an average land use factor (e.g., km<sup>2</sup>/MWh or km<sup>2</sup>/MW) sourced from the literature. For biomass, RIO results are reported as dry tons of woody, waste, or herbaceous biomass resource form categories by price bin and by state. In order to estimate biomass land use requirements, we disaggregated biomass demand by specific resource with each resource form category using proportional allocation based on the supply curve in The Billion Ton study (19). For example, within the herbaceous resource form category and price point of \$100 for the state of Colorado in 2040, the resource supply is roughly 42% wheat straw, 16% switchgrass, 41% corn stover, and <1% barley straw. We allocated estimated demand for each of these herbaceous resources by multiplying Colorado’s total herbaceous demand in 2040 by each of these fractions. We considered no dedicated land use requirements for residue and waste resources. For woody resources, we estimated land use using yields for eucalyptus, hardwood upland and lowland whole trees, mixed wood whole trees, pine, poplar, willow, and softwood natural and planted whole trees. For herbaceous resources, we estimated land use needs for switchgrass and miscanthus, biomass sorghum, and energy cane.

**Table S14. Land use factor assumptions**

| Technology or resource | Source                                                                                                                                                                   | land use efficiency                      | Units                                |
|------------------------|--------------------------------------------------------------------------------------------------------------------------------------------------------------------------|------------------------------------------|--------------------------------------|
| Onshore wind           | Miller and Keith (2018, 2019) (14, 15)                                                                                                                                   | 2.7                                      | MW/km <sup>2</sup>                   |
| Offshore wind          | Borrmann et al. (2018) (16) median of the literature values                                                                                                              | 5.2                                      | MW/km <sup>2</sup>                   |
| Utility-scale solar    | Ong et al. (2013) (44), Hernandez et al. (2015) (45)                                                                                                                     | 30                                       | MW/km <sup>2</sup>                   |
| Transmission           | WECC 2019 Transmission Capital Cost Tool (46)                                                                                                                            | 230 kV: 40 m; 345 kV: 60 m; 500 kV: 76 m | meters (corridor width)              |
| Direct Air Capture     | Baker et al. 2020 (47)                                                                                                                                                   | 2                                        | km <sup>2</sup> /MT (million tonnes) |
| Switchgrass            | <a href="http://switchgrass.okstate.edu/realistic-expectations-for-switchgrass">http://switchgrass.okstate.edu/realistic-expectations-for-switchgrass</a><br>6 tons/acre | 15                                       | dry tons/ha (US tons)                |
| Miscanthus             | <a href="https://www.nrcs.usda.gov/Internet/FSE_DOCUMENTS/stelprdb1044768.pdf">https://www.nrcs.usda.gov/Internet/FSE_DOCUMENTS/stelprdb1044768.pdf</a> 10 tons/acre     | 25                                       | dry tons/ha (US tons)                |
| Biomass sorghum        | Rooney et al. 2007 (48) (18-32 or 25 Mg/ha)                                                                                                                              | 25                                       | dry tonnes/ha                        |

|             |                                                                                                                                                                                                                                                                                                                                                                                                                                                                                  |      |                       |
|-------------|----------------------------------------------------------------------------------------------------------------------------------------------------------------------------------------------------------------------------------------------------------------------------------------------------------------------------------------------------------------------------------------------------------------------------------------------------------------------------------|------|-----------------------|
| Energy cane | Salassi et al. (2014) (49)                                                                                                                                                                                                                                                                                                                                                                                                                                                       | 16.4 | dry tons/ha (US tons) |
| Eucalyptus  | Hall et al. (2020) (50)                                                                                                                                                                                                                                                                                                                                                                                                                                                          | 50   | dry tons/ha (US tons) |
| Hardwood    | Use the same assumptions as willow                                                                                                                                                                                                                                                                                                                                                                                                                                               | 11.7 | dry tons/ha (US tons) |
| Mixed wood  | Average between hardwood and softwood                                                                                                                                                                                                                                                                                                                                                                                                                                            | 15.5 | dry tons/ha (US tons) |
| Pine        | <a href="https://www.warnell.uga.edu/sites/default/files/publications/SRWB_Growth_and_Yield_Paper_6_July_2011_0.pdf">https://www.warnell.uga.edu/sites/default/files/publications/SRWB_Growth_and_Yield_Paper_6_July_2011_0.pdf</a> 10 green tons/acre/year, 22% water volume ( <a href="https://shodor.org/succeedhi/succeedhi/weightree/percentWater-content.html">https://shodor.org/succeedhi/succeedhi/weightree/percentWater-content.html</a> ) (assuming 9 year rotation) | 19.2 | dry tons/ha (US tons) |
| Poplar      | Langholtz et al. 2016 (19) average of range from 3.9 to 5.6 dry tons per acre                                                                                                                                                                                                                                                                                                                                                                                                    | 11.7 | dry tons/ha (US tons) |
| Willow      | Langholtz et al. 2016 (19) average of range from 2.8 to 6.2 dry tons per acre                                                                                                                                                                                                                                                                                                                                                                                                    | 11.7 | dry tons/ha (US tons) |
| Softwood    | Use the same assumptions as pine                                                                                                                                                                                                                                                                                                                                                                                                                                                 | 19.2 | dry tons/ha (US tons) |

**F. Stage 6. Strategic environmental assessment.** We conducted an area-based strategic environmental assessment using the modeled generation, gen-tie, and transmission spatial build-out of portfolios created in Stage 5 (Section E). Using spatial overlay functions in Python, we estimated the area of each land cover type or environmental metric impacted by wind, solar, or power line development.

The purpose of the strategic environmental assessment is to anticipate the impact of energy development on lands with conservation value, and to examine whether siting protections can be effective in reducing development in areas with high conservation value. For transmission lines with polyline spatial data, we approximated polygon corridor footprints using the average corridor width for each line based on voltage-specific Right of Way factors in the WECC TEPPC transmission cost calculator (see SM Table S14 for widths). For each infrastructure type (generation, gen-tie, transmission) and each scenario, we calculated the amount of land area that overlaps with the three Environmental Exclusion Categories, 20 other environmental metrics, and social metrics such as population density and demographics. Ecological and landscape metrics included critical habitat for sensitive and listed species, sage grouse habitat, Important Bird Areas, wetlands, big game corridors, eagle habitat, wildlife linkages (51), wildfire risk, and habitat areas of particular concern (for offshore wind). Working lands metrics include all agricultural land (crop and pasture land), prime farmland, and rangelands (52). For rangelands, we used the only known publicly available rangelands extent maps for the U.S. created by Reeves and Mitchell (52) and chose the map created using the National Resources Inventory (NRI) definition of rangelands mapped using the 2001 LANDFIRE landcover dataset. We use the rangelands definition adopted by the Natural Resources Conservation Service’s NRI program, which states that rangelands are, “land on which the climax or potential plant cover is composed principally of native grasses, grass-like plants, forbs or shrubs suitable for grazing and browsing, and introduced forage species that are managed like rangeland” (52). Several environmental metrics are comprised of datasets that are also used in Environmental Exclusion Categories 2-3. See SM Table S16 for the underlying datasets, sources for each metric, and whether a metric was also included in an Environmental Exclusion Category.

The metrics for the strategic environmental assessment were chosen to represent two types of impacts—specific and generalized. The specific metrics (e.g., sage grouse habitat and wildlife linkages) were intended to explore areas of focus in current public discourse in energy planning forums. Thus, several specific metrics were chosen to explore trends and implications to key species. In contrast, the generalized metrics (e.g., impacts to Environmental Exclusion Category 3 lands) are meant to explore overall impacts to natural and working lands for a given resource portfolio.

For social metrics, we calculated the area-weighted average median income, percent living below poverty, percent unemployed, and population density for each infrastructure type using the social vulnerability metrics collected by the Census Bureau and made available by the CDC and ATSDR (53). Finally, we estimated the human population residing within several buffered distances of each downscaled infrastructure type as an indicator of the number of people within a given proximity to this infrastructure using the LandScan population density dataset (54). Studies of wind farm visibility suggest that turbines have visual impact within a distance of 16 km from a wind farm (55), but no equivalent distances have been determined for solar PV farms (56, 57). For high voltage transmission lines, studies have suggested 2-4 km as the distance within which a 500 kV transmission tower has high visual impact (58). The distance is slightly shorter (1.6 km) for spur transmission lines rated at 230 kV (58).

**Table S15. Existing and planned energy infrastructure datasets**

| Broad category                 | Dataset name                                                              | Source                                                                             | Website                                                                                                                                                                                         | Description                                                                                                                                                                                                                                                                                                                                                                                                                                                                                                                                                                                   | Data type/ resolution                                        | Usage in study                                                                                                                           |
|--------------------------------|---------------------------------------------------------------------------|------------------------------------------------------------------------------------|-------------------------------------------------------------------------------------------------------------------------------------------------------------------------------------------------|-----------------------------------------------------------------------------------------------------------------------------------------------------------------------------------------------------------------------------------------------------------------------------------------------------------------------------------------------------------------------------------------------------------------------------------------------------------------------------------------------------------------------------------------------------------------------------------------------|--------------------------------------------------------------|------------------------------------------------------------------------------------------------------------------------------------------|
| Existing power plant locations | United States Wind Turbine Database (USWTDB)                              | USGS, Berkeley Lab, AWEA                                                           | <a href="https://eerscmap.usgs.gov/uswtdb/data/">https://eerscmap.usgs.gov/uswtdb/data/</a>                                                                                                     | Point locations of on-shore and off-shore turbines in the U.S. It is updated quarterly. Accessed on 9/13/18                                                                                                                                                                                                                                                                                                                                                                                                                                                                                   | Shapefile or Geojson                                         | Exclude from potential project areas                                                                                                     |
| Existing power plant locations | Surface area of solar arrays in the conterminous United States as of 2015 | USGS (21)                                                                          | <a href="https://www.sciencebase.gov/catalog/item/57a25271e4b006cb45553efa">https://www.sciencebase.gov/catalog/item/57a25271e4b006cb45553efa</a>                                               | Footprint area of solar arrays in the conterminous U.S. based on EIA utility-scale facilities data from 2015                                                                                                                                                                                                                                                                                                                                                                                                                                                                                  | Shapefile                                                    | Exclude from potential project areas                                                                                                     |
| Existing power plant locations | Surface area of utility-scale solar arrays in California as of 2018       | The Nature Conservancy (59)                                                        | Unpublished                                                                                                                                                                                     | Footprint area of solar arrays in California created using satellite imagery                                                                                                                                                                                                                                                                                                                                                                                                                                                                                                                  | Shapefile                                                    | Exclude from potential project areas                                                                                                     |
| Existing power plant locations | California's commercial wind and solar project locations                  | DataBasin, Black & Veatch, Public Utilities Commission                             | <a href="https://databasin.org/maps/365216c4ead144718ec68294035a2646">https://databasin.org/maps/365216c4ead144718ec68294035a2646</a>                                                           | Existing and commercial wind and solar project locations (those with power purchase agreements from RPS Calculator and the California Public Utilities Commission)                                                                                                                                                                                                                                                                                                                                                                                                                            | Shapefile (point locations)                                  | Used in conjunction with footprint areas to exclude from potential project areas                                                         |
| Existing power plant locations | Renewable Portfolio Standard Executed Projects (California)               | Public Utilities Commission                                                        | <a href="http://cpuc.ca.gov/RPS_Reports_Data/">http://cpuc.ca.gov/RPS_Reports_Data/</a>                                                                                                         | Public information of investor owned utility renewable contracts under the RPS program include: contract summaries, contract counterparties, resource type, location, delivery point, expected deliveries, capacity, length of contract, and online date.                                                                                                                                                                                                                                                                                                                                     | Spreadsheet with geographic coordinates of project locations | Used in conjunction with footprint areas to exclude from potential project areas                                                         |
| Transmission infrastructure    | Electric transmission line                                                | Homeland Infrastructure Foundation Level Data (HIFLD)                              | <a href="https://hifld-geoplatform.opendata.arcgis.com/datasets/electric-power-transmission-lines">https://hifld-geoplatform.opendata.arcgis.com/datasets/electric-power-transmission-lines</a> | Transmission line locations as polylines with attribute data on voltages. This data are usually updated quarterly. Accessed on 6/23/2020.                                                                                                                                                                                                                                                                                                                                                                                                                                                     | Geodatabase feature class                                    | Selecting potential project areas and modeling transmission corridor needs.                                                              |
| Transmission infrastructure    | BLM recently approved Transmission lines                                  | Environmental Planning Group LLC, Bureau of Land Management, Argonne National Labs | View lines: <a href="https://bogi.evs.anl.gov/section368/portal/">https://bogi.evs.anl.gov/section368/portal/</a>                                                                               | We included the following six planned transmission corridors in "advanced development" and "recently approved": Gateway South, Gateway West, Southline, SunZia, TransWest Express, SWIP North, and Boardman to Hemingway. Spatial data can be requested from Argonne National Labs. These lines are listed as being in Phase 2 or 3 of the WECC Path Rating Process in the California Energy Commission's RETI 2.0 report "RETI 2.0 Western States Outreach Project Report" ( <a href="https://www.energy.ca.gov/reti/reti2/documents/">https://www.energy.ca.gov/reti/reti2/documents/</a> ) | Geodatabase feature class                                    | Selecting potential project areas and modeling transmission corridor needs. Buffered lines using project reports' planned corridor width |



**Table S16. Datasets for Strategic Environmental Assessment**

| Metric                                           | Dataset name                                                                                   | Source                                                                                                                                                                                                                                         | Environmental Exclusion Category | Unique ID | Data type/ resolution |
|--------------------------------------------------|------------------------------------------------------------------------------------------------|------------------------------------------------------------------------------------------------------------------------------------------------------------------------------------------------------------------------------------------------|----------------------------------|-----------|-----------------------|
| Critical habitat                                 | Critical habitat                                                                               |                                                                                                                                                                                                                                                | 2                                | 0051      | Shapefile             |
| Critical habitat                                 | Desert tortoise critical habitat                                                               | WWWMP (high level)                                                                                                                                                                                                                             | 2                                | 0075      | Shapefile             |
| Critical habitat                                 | Coastal critical habitat                                                                       |                                                                                                                                                                                                                                                | 2                                | 0101      | Shapefile             |
| Critical habitat                                 | Critical habitat                                                                               | WWWMP (high level)                                                                                                                                                                                                                             | 2                                | 0262      | Shapefile             |
| Sage Grouse habitat                              | Priority habitat management area - exclusion                                                   | WWWMP - BLM                                                                                                                                                                                                                                    | 2                                | 0257      | Shapefile             |
| Sage Grouse habitat                              | Priority habitat management area, high level siting considerations                             | WWWMP - BLM                                                                                                                                                                                                                                    | 2                                | 0258      | Shapefile             |
| Sage Grouse habitat                              | General habitat management area, high level siting considerations                              | WWWMP - BLM                                                                                                                                                                                                                                    | 3                                | 0259      | Shapefile             |
| Sage Grouse habitat                              | General habitat management area, moderate level siting considerations                          | WWWMP - BLM                                                                                                                                                                                                                                    | 3                                | 0260      | Shapefile             |
| Sage Grouse habitat                              | Greater sage grouse priority areas for conservation                                            | FWS                                                                                                                                                                                                                                            | 2                                | 0266      | Shapefile             |
| Important Bird Areas                             | Important Bird Areas - state and globally important (Apr 2018)                                 | Audubon Society                                                                                                                                                                                                                                | 3                                | 0110      | Shapefile             |
| Big game corridors                               | Wyoming Big Game Crucial Habitat (Elk, Mule Deer, Bighorn Sheep, Pronghorn, White-tailed Deer) | Wyoming Game and Fish                                                                                                                                                                                                                          | 2                                | 0100      | Shapefile             |
| Big game corridors                               | WECC Big Game (ALLTYPES3 LIKE '%Big Game Winter Range%')                                       | WECC                                                                                                                                                                                                                                           | 3                                | 0105      | Shapefile             |
| Big game corridors                               | Washington Deer areas                                                                          | Washington Department of Fish and Wildlife                                                                                                                                                                                                     | 3                                | 0123      | Shapefile             |
| Big game corridors                               | Washington Elk areas                                                                           | Washington Department of Fish and Wildlife                                                                                                                                                                                                     | 3                                | 0124      | Shapefile             |
| Big game corridors                               | Oregon Elk and Deer Winter Range                                                               | Oregon Department of Fish and Wildlife                                                                                                                                                                                                         | 3                                | 0149      | Shapefile             |
| Big game corridors                               | Columbian White-tailed deer range                                                              | USFWS                                                                                                                                                                                                                                          | 3                                | 0155      | Shapefile             |
| Wildlife linkages                                | Wildlife linkages with corridor values > 34.3428                                               | The Wilderness Society (51)                                                                                                                                                                                                                    | 4                                | 0172      | Shapefile             |
| Eagle habitat                                    | Bald Eagle habitat                                                                             | WWWMP - BLM                                                                                                                                                                                                                                    | 2 (wind only)                    | 0076      | Shapefile             |
| Eagle habitat                                    | West-wide eagle risk data using the 2 of quantile bins (top 30% of eagle habitat)              | USFWS (Bedrosian et al. 2018)                                                                                                                                                                                                                  | 2 (wind only)                    | 0102      | Shapefile             |
| Eagle habitat                                    | Golden Eagle habitat                                                                           | WWWMP                                                                                                                                                                                                                                          | 2 (wind only)                    | 0228      | Shapefile             |
| RCN                                              | Resilient Connected Network                                                                    | The Nature Conservancy <a href="https://maps.tnc.org/resilientland/">https://maps.tnc.org/resilientland/</a>                                                                                                                                   | 3                                | na        | Shapefile             |
| HAPC                                             | Marine Habitat Areas of Particular Concern                                                     | NOAA                                                                                                                                                                                                                                           | 2                                | na        | Shapefile             |
| Prime farmland                                   | Prime farmland based on high quality soils                                                     | Natural Resources Conservation Service                                                                                                                                                                                                         | 3                                | 0267      | Shapefile             |
| Agricultural land, grassland, shrubland, conifer | LANDFIRE 2016 Existing Vegetation Type (EVT) "EVT_PHYS" field                                  | LANDFIRE <a href="https://landfire.gov/version_download.php#">https://landfire.gov/version_download.php#</a>                                                                                                                                   | NA                               | NA        | raster/ 30m           |
| Rangelands                                       | U.S.rangelands extent using NRI-LANDFIRE model                                                 | Reeves et al. 2011 (52)                                                                                                                                                                                                                        | NA                               | NA        | raster/ 30m           |
| Population density and count                     | LandScan Global Population Density and Count                                                   | LANDSCAN ORNL <a href="https://landscan.ornl.gov/">https://landscan.ornl.gov/</a>                                                                                                                                                              | NA                               | NA        | raster                |
| Wildfire risk                                    | Wildfire Hazard Potential                                                                      | US Forest Service and US Department of Agriculture <a href="https://www.firelab.org/project/wildfire-hazard-potential">https://www.firelab.org/project/wildfire-hazard-potential</a>                                                           | NA                               | NA        | raster/270m           |
| Social Vulnerability Index                       | CDC Social Vulnerability Index (EP_POV, EP_UNEMP, EP_PC1)                                      | Center for Disease Control and Prevention SVI 2018 <a href="https://www.atsdr.cdc.gov/placeandhealth/svi/documentation/SVI_documentation_2018.html">https://www.atsdr.cdc.gov/placeandhealth/svi/documentation/SVI_documentation_2018.html</a> | NA                               | NA        | shapefile             |

**Table S17. Datasets for Environmental Exclusion Category 1 (site suitability). Definitions: Exclude development (EX), Avoid development (AV), WECC Environmental Risk Class (RC 1, 2, 3, 4), BLM High Level Siting Considerations (HLSC), BLM Moderate Level Siting Considerations (MLSC), information not available (NA), Study abbreviation and names: ORB 2015 (Optimal Renewable Energy Build-out), BLM WSEP (BLM Western Solar Energy Program), BLM WWW-MP (BLM West-wide Wind Mapping Program), WECC (Western Electricity Coordinating Council Environmental Data Viewer), WREZ (Western Renewable Energy Zones), RETI CPUC (Renewable Energy Transmission Initiative of the California Public Utilities Commission)**

| Unique ID | Environmental Category | Technology | Data Publisher Organization             | Dataset Name                                                                                 | ORB 2015 (7) | BLM WSEP (60) | BLM WWW-MP (?) (8)        | BLM DRECP | WECC (61)             | WREZ (4) | RETI CPUC (3)    |
|-----------|------------------------|------------|-----------------------------------------|----------------------------------------------------------------------------------------------|--------------|---------------|---------------------------|-----------|-----------------------|----------|------------------|
| 1         | All                    | All        | National Park Service                   | NPS boundaries - National Historic Trails                                                    | EX           | EX            | EX                        | EX        | RC 2                  | EX       | EX               |
| 2         | All                    | All        | BLM - WWWMP                             | National Scenic Trails                                                                       | NA           | EX            | EX                        | EX        | NA                    | EX       | NA               |
| 3         | All                    | All        | BLM - WWWMP                             | National Historic Landmarks                                                                  | NA           | NA            | EX                        | NA        | NA                    | NA       | NA               |
| 4         | All                    | All        | BLM - WWWMP                             | National Natural Landmarks                                                                   | NA           | NA            | EX                        | NA        | NA                    | NA       | NA               |
| 5         | All                    | All        | United States Geological Survey         | Wild and Scenic Rivers Easements                                                             | NA           | EX            | EX                        | NA        | RC 3                  | EX       | EX               |
| 6         | All                    | All        | Natural Resources Conservation Service  | Conservation Easements                                                                       | EX           | NA            | NA                        | NA        | RC 3                  | EX       | EX               |
| 8         | All                    | All        | National Conservation Easement Database | Conservation Easements                                                                       | NA           | NA            | NA                        | NA        | NA                    | NA       | NA               |
| 9         | All                    | All        | Bureau of Land Management               | BLM Solar Energy Program SEZ non-dev                                                         | NA           | EX            | NA                        | NA        | NA                    | NA       | NA               |
| 10        | All                    | All        | BLM - WWWMP                             | Visual Resource Management                                                                   | NA           | EX            | EX                        | NA        | NA                    | AV       | NA               |
| 11        | Solar                  | All        | Bureau of Land Management               | BLM Solar Energy Program exclusions                                                          | NA           | NA            | NA                        | NA        | NA                    | NA       | NA               |
| 12        | All                    | All        | USGS PAD-US                             | National Primitive Area                                                                      | EX           | NA            | NA                        | NA        | RC 4                  | EX       | NA               |
| 13        | All                    | All        | USGS PAD-US                             | National Wildlife Refuge                                                                     | EX           | NA            | NA                        | NA        | RC 4                  | EX       | EX               |
| 14        | All                    | All        | USGS PAD-US                             | Units of the National Parks System (excluding National Recreation Areas and National Trails) | EX           | EX            | NA                        | NA        | RC 4                  | EX       | EX               |
| 15        | All                    | All        | USGS PAD-US                             | Wilderness Area                                                                              | EX           | EX            | EX                        | NA        | RC 4                  | EX       | EX               |
| 16        | All                    | All        | USGS PAD-US                             | Wilderness Area (Recommended)                                                                | NA           | NA            | NA                        | NA        | RC 4                  | EX       | NA               |
| 17        | All                    | All        | USGS PAD-US                             | Wilderness Study Area                                                                        | EX           | EX            | EX                        | NA        | RC 4                  | EX       | EX               |
| 20        | All                    | All        | BLM - WWWMP                             | National Conservation Area                                                                   | EX           | EX            | EX                        | NA        | RC 3                  | EX       | EX               |
| 21        | All                    | All        | USGS PAD-US                             | National Monument                                                                            | EX           | EX            | EX                        | NA        | RC 3                  | EX       | EX               |
| 22        | All                    | All        | USGS PAD-US                             | National Recreation Area                                                                     | EX           | NA            | NA                        | NA        | RC 3                  | EX       | EX               |
| 23        | All                    | All        | USGS PAD-US                             | Research Natural Area - Proposed                                                             | EX           | NA            | NA                        | NA        | RC 3                  | NA       | NA               |
| 24        | All                    | All        | BLM - WWWMP                             | Desert Renewable Energy Conservation Plan Special Recreation Management Area                 | EX           | EX            | EX in CA; MLSC elsewhere. | EX        | NA                    | AV       | EX in DRECP area |
| 25        | All                    | All        | USGS PAD-US                             | State Park                                                                                   | EX           | NA            | NA                        | NA        | RC 3                  | EX       | EX               |
| 26        | All                    | All        | USGS PAD-US                             | State Wildlife Management Areas                                                              | EX           | NA            | NA                        | NA        | RC 3                  | AV       | NA               |
| 28        | All                    | All        | BLM - WWWMP                             | National Register Historic Places                                                            | EX           | NA            | EX                        | NA        | NA                    | NA       | NA               |
| 29        | All                    | All        | USGS PAD-US                             | State Wilderness Areas                                                                       | EX           | NA            | NA                        | NA        | NA                    | EX       | EX               |
| 30        | All                    | All        | USGS PAD-US                             | DFW Wildlife Areas and Ecological Reserves                                                   | EX           | NA            | NA                        | NA        | NA                    | NA       | NA               |
| 31        | All                    | All        | USGS PAD-US                             | Existing Conservation and Mitigation Bank                                                    | EX           | NA            | NA                        | NA        | NA                    | EX       | EX               |
| 32        | All                    | All        | USGS PAD-US                             | Watershed Protection Area                                                                    | EX           | NA            | NA                        | NA        | NA                    | EX       | EX               |
| 33        | All                    | All        | USGS PAD-US                             | Marine Protected Area                                                                        | EX           | NA            | NA                        | NA        | NA                    | EX       | NA               |
| 34        | All                    | All        | USGS PAD-US                             | Historic or Cultural Area                                                                    | EX           | EX            | NA                        | NA        | NA                    | AV       | EX               |
| 35        | All                    | All        | California State Agencies               | Habitat Conservation Plan                                                                    | AV           | NA            | NA                        | NA        | Non-preferred dataset | AV       | EX               |
| 36        | All                    | All        | California State Agencies               | Natural Community Conservation Plan                                                          | AV           | NA            | NA                        | NA        | Non-preferred dataset | AV       | EX               |
| 38        | All                    | All        | BLM - WWWMP                             | DRECP NCL                                                                                    | NA           | NA            | NA                        | EX        | NA                    | NA       | NA               |
| 39        | All                    | All        | BLM - WWWMP                             | Park boundaries                                                                              | NA           | NA            | NA                        | NA        | NA                    | NA       | NA               |
| 190       | Solar                  | All        | USGS PAD-US                             | Right of Way exclusion                                                                       | NA           | NA            | NA                        | NA        | RC 3                  | NA       | NA               |
| 240       | All                    | All        | Colorado Natural Heritage Program       | Colorado protected lands                                                                     | NA           | NA            | NA                        | NA        | NA                    | NA       | NA               |
| 252       | All                    | All        | BLM - WWWMP                             | conservation                                                                                 | NA           | NA            | EX                        | NA        | NA                    | NA       | NA               |
| 256       | All                    | All        | BLM - WWWMP                             | Right of Way exclusion                                                                       | NA           | NA            | EX                        | NA        | NA                    | NA       | NA               |
| 301       | All                    | All        | The Nature Conservancy                  | GAP_SisPNW_V2_20200326                                                                       | NA           | NA            | NA                        | NA        | NA                    | NA       | NA               |
| 306       | All                    | All        | State of Montana                        | Montana Public Lands                                                                         | NA           | NA            | NA                        | NA        | NA                    | NA       | NA               |
| 311       | All                    | All        | The Nature Conservancy Idaho            | Idaho TNC Fee                                                                                | NA           | NA            | NA                        | NA        | NA                    | NA       | NA               |
| 8b        | All                    | All        | The Nature Conservancy Wyoming          | Conservation Easements                                                                       | NA           | NA            | NA                        | NA        | NA                    | NA       | NA               |
| 8c        | All                    | All        | The Nature Conservancy Arizona          | Conservation Easements                                                                       | NA           | NA            | NA                        | NA        | NA                    | NA       | NA               |
| 8d        | All                    | All        | State of Montana                        | Montana Conservation Easements                                                               | NA           | NA            | NA                        | NA        | NA                    | NA       | NA               |
| 8e        | All                    | All        | The Nature Conservancy Idaho            | Idaho Conservation Easements                                                                 | NA           | NA            | NA                        | NA        | NA                    | NA       | NA               |
| 8f        | All                    | All        | The Nature Conservancy Idaho            | Idaho Other Conservation Easements                                                           | NA           | NA            | NA                        | NA        | NA                    | NA       | NA               |

**Table S18. Datasets for Environmental Exclusion Category 2. Definitions: Exclude development (EX), Avoid development (AV), WECC Environmental Risk Class (RC 1, 2, 3, 4), BLM High Level Siting Considerations (HLSC), BLM Moderate Level Siting Considerations (MLSC), Information not available (NA). Study abbreviation and names: ORB 2015 (Optimal Renewable Energy Build-out), BLM WSEP (BLM Western Solar Energy Program), BLM WW-MP (BLM West-wide Wind Mapping Program), WECC (Western Electricity Coordinating Council Environmental Data Viewer), WREZ (Western Renewable Energy Zones), RETI CPUC (Renewable Energy Transmission Initiative of the California Public Utilities Commission)**

| Unique Data ID | Environmental Category | Technology | Data Publisher Organization                    | Dataset Name                                                                                          | ORB 2015 (7) | BLM WSEP (60) | BLM WW-MP (7) | BLM WSEP (60) | WECC (61) | WREZ (4) | RETI CPUC (3) |
|----------------|------------------------|------------|------------------------------------------------|-------------------------------------------------------------------------------------------------------|--------------|---------------|---------------|---------------|-----------|----------|---------------|
| 18             | 2                      | All        | BLM - WWWMP                                    | Areas of Critical Environmental Concern                                                               | EX           | EX            | EX            | EX            | RC 3      | EX       | EX            |
| 27             | 2                      | Wind       | New Mexico County governments                  | New Mexico County wind ordinances                                                                     | NA           | NA            | NA            | NA            | NA        | NA       | NA            |
| 43             | 2                      | All        | BLM - WWWMP                                    | Visual Resource Management II                                                                         | NA           | NA            | HLSC          | NA            | NA        | NA       | NA            |
| 44             | 2                      | All        | USGS PAD-US                                    | State Forest                                                                                          | EX           | NA            | NA            | NA            | RC 3      | EX       | EX            |
| 45             | 2                      | All        | BLM - WWWMP                                    | National Park Service Areas of High Potential Resource Conflict                                       | NA           | NA            | MLSC          | NA            | NA        | NA       | AV            |
| 46             | 2                      | All        | California Department of Fish and Game         | Central Valley Wetland and Riparian Areas                                                             | EX           | NA            | NA            | NA            | RC 3      | EX       | EX            |
| 47             | 2                      | All        | BLM - WWWMP                                    | No Surface Occupancy                                                                                  | EX           | EX            | HLSC          | NA            | NA        | NA       | NA            |
| 51             | 2                      | All        | United States Fish and Wildlife Service        | Critical Habitat for Threatened and Endangered Species Composite Layer                                | AV           | EX            | HLSC          | NA            | RC 3      | NA       | AV            |
| 51b            | 2                      | All        | Montana Fish, Wildlife and Parks               | Bull Trout and Pallid Sturgeon Streams and Lakes                                                      | NA           | NA            | NA            | NA            | NA        | NA       | NA            |
| 52             | 2                      | All        | United States Fish and Wildlife Service        | Wetlands - prc                                                                                        | EX           | NA            | NA            | NA            | RC 2      | EX       | NA            |
| 52b            | 2                      | All        | State of Montana                               | Wetlands and Riparians                                                                                | EX           | NA            | NA            | NA            | RC 2      | EX       | NA            |
| 52c            | 2                      | All        | State of New Mexico                            | Wetlands and Riparians                                                                                | EX           | NA            | NA            | NA            | RC 2      | EX       | NA            |
| 53             | 2                      | All        | United States Forest Service                   | NMFA2020 Theme <i>Biodiversity</i> Riparian Corridors                                                 | EX           | NA            | NA            | NA            | RC 3      | EX       | EX            |
| 54             | 2                      | All        | Nevada Natural Heritage Program                | National Inventoried Roadless Areas                                                                   | EX           | NA            | NA            | NA            | RC 3      | NA       | NA            |
| 57             | 2                      | All        | USGS PAD-US                                    | Priority Wetlands Inventory                                                                           | NA           | NA            | NA            | NA            | RC 2      | NA       | NA            |
| 58             | 2                      | All        | BLM - WWWMP                                    | Special Interest Area                                                                                 | AV           | NA            | NA            | NA            | RC 3      | AV       | NA            |
| 59             | 2                      | All        | BLM - WWWMP                                    | Desert Renewable Energy Conservation Plan                                                             | NA           | NA            | HLSC          | NA            | NA        | NA       | NA            |
| 60             | 2                      | All        | BLM - WWWMP                                    | Desert Renewable Energy Conservation Plan                                                             | NA           | NA            | EX            | NA            | NA        | NA       | EX in DRECP   |
| 61             | 2                      | All        | BLM - WWWMP                                    | Desert Renewable Energy Conservation Plan Off Highway Vehicles                                        | NA           | NA            | EX            | NA            | NA        | AV       | NA            |
| 62             | 2                      | Wind       | BLM - WWWMP                                    | Development Focus Area - solar and geothermal only (excluding wind)                                   | NA           | NA            | MLSC          | NA            | NA        | AV       | NA            |
| 63             | 2                      | All        | USGS PAD-US                                    | U.S. Army Corps of Engineers Land                                                                     | NA           | NA            | NA            | NA            | RC 2      | NA       | NA            |
| 65             | 2                      | All        | USGS PAD-US                                    | Other private non-profit land                                                                         | EX           | NA            | NA            | NA            | RC 2      | NA       | NA            |
| 66             | 2                      | All        | TNC WAFO                                       | TNC_Lands_Features                                                                                    | EX           | NA            | NA            | NA            | NA        | NA       | NA            |
| 67             | 2                      | All        | WA DNR                                         | Spotted Owl Management Units                                                                          | NA           | NA            | NA            | NA            | NA        | EX       | EX            |
| 68             | 2                      | All        | WA DNR                                         | Habitat Conservation Plan Lands                                                                       | NA           | NA            | NA            | NA            | NA        | EX       | EX            |
| 71             | 2                      | All        | USGS PAD-US                                    | State Reserves                                                                                        | AV           | NA            | NA            | NA            | NA        | NA       | NA            |
| 72             | 2                      | All        | USGS PAD-US                                    | Other wildlife areas and ecological reserves                                                          | AV           | NA            | NA            | NA            | NA        | NA       | NA            |
| 73             | 2                      | All        | Los Angeles County                             | Significant ecological areas                                                                          | AV           | NA            | NA            | NA            | NA        | NA       | NA            |
| 75             | 2                      | All        | BLM - WWWMP                                    | Desert Tortoise Critical Habitat                                                                      | AV           | NA            | HLSC          | NA            | NA        | NA       | NA            |
| 76             | 2                      | Wind       | from Courtney Larson, TNC                      | Bald Eagle Summer and Winter High Probability of occurrence                                           | NA           | NA            | MLSC          | NA            | NA        | NA       | NA            |
| 77             | 2                      | All        | USFWS                                          | Vernal pools                                                                                          | NA           | NA            | NA            | NA            | NA        | NA       | AV            |
| 78             | 2                      | All        | USFWS                                          | 2012RemapVernalPoolsFINAL.zip                                                                         | NA           | NA            | NA            | NA            | NA        | NA       | AV            |
| 79             | 2                      | All        | CDFW                                           | SANGIS_ECO_VERNAL_POOLS.shp                                                                           | NA           | NA            | NA            | NA            | NA        | NA       | AV            |
| 80             | 2                      | All        | CDFW                                           | ds948.shp                                                                                             | NA           | NA            | NA            | NA            | NA        | NA       | AV            |
| 81             | 2                      | All        | USDA Forest Service, Modoc National Forest.    | Vernal pools, Modoc. ds949.zip                                                                        | NA           | NA            | NA            | NA            | NA        | NA       | AV            |
| 82             | 2                      | All        | BLM                                            | BLM_Lands with Wilderness Characteristics (DRECP)                                                     | NA           | EX            | EX            | EX            | NA        | AV       | NA            |
| 83             | 2                      | All        | BLM - WWWMP                                    | BLM_Lands with Wilderness Characteristics (WWWMP)                                                     | NA           | EX            | EX            | EX            | NA        | AV       | NA            |
| 85             | 2                      | All        | Bureau of Land Management DRECP                | National Landscape Conservation Survey Pre-ferred Subareas                                            | NA           | EX            | EX            | EX            | NA        | EX       | NA            |
| 91             | 2                      | Wind       | TNC "Site Wind Right" study                    | Cooperative Whooping Crane Tracking Project database Pearse et al. (2015) National Wetlands Inventory | NA           | NA            | NA            | NA            | NA        | NA       | NA            |
| 92             | 2                      | Wind       | University of Kansas, Kansas Biological Survey | SGPCHAT                                                                                               | NA           | NA            | NA            | NA            | NA        | NA       | NA            |
| 96             | 2                      | All        | Colorado Parks and Wildlife                    | Pieble S Jumping Mouse                                                                                | NA           | NA            | NA            | NA            | NA        | NA       | NA            |
| 97             | 2                      | All        | Colorado Parks and Wildlife                    | Mule deer                                                                                             | NA           | NA            | NA            | NA            | NA        | NA       | NA            |

**Table S18. Datasets for Environmental Exclusion Category 2. Definitions: Exclude development (EX), Avoid development (AV), WECC Environmental Risk Class (RC 1, 2, 3, 4), BLM High Level Siting Considerations (HLSC), BLM Moderate Level Siting Considerations (MLSC), Information not available (NA). Study abbreviation and names: ORB 2015 (Optimal Renewable Energy Build-out), BLM WSEP (BLM Western Solar Energy Program), BLM WWW-MP (BLM West-wide Wind Mapping Program), WECC (Western Electricity Coordinating Council Environmental Data Viewer), WREZ (Western Renewable Energy Zones), RETI CPUC (Renewable Energy Transmission Initiative of the California Public Utilities Commission)**

| Unique Data ID | Environmental Category | Technology                                      | Data Publisher Organization                  | Dataset Name                                                                 | ORB 2015 (7) | BLM WSEP (60) | BLM WWW-MP (? ) (8) | BLM DRECP | WECC (61) | WREZ (4) | RETI CPUC (3) |
|----------------|------------------------|-------------------------------------------------|----------------------------------------------|------------------------------------------------------------------------------|--------------|---------------|---------------------|-----------|-----------|----------|---------------|
| 100            | 2                      | All                                             | Wyoming Game and Fish                        | Big Game Crucial Habitat                                                     | NA           | NA            | NA                  | NA        | RC 3      | NA       | NA            |
| 101            | 2                      | All                                             | NOAA/USFWS                                   | Critical Habitat Designations (map service layer)                            | AV           | NA            | NA                  | NA        | NA        | NA       | NA            |
| 102            | 2                      | Wind                                            | FWS                                          | West-Wide Golden Eagle Nest Density                                          | NA           | NA            | NA                  | NA        | NA        | NA       | NA            |
| 185            | 2                      | All                                             | USGS PAD-US                                  | Research Natural Area                                                        | EX/AV        | NA            | NA                  | NA        | RC 3      | AV       | EX            |
| 234            | 2                      | Wind                                            | Colorado Parks and Wildlife                  | Bald Eagle nest sites, roosting sites, concentration areas                   | NA           | NA            | NA                  | NA        | NA        | NA       | NA            |
| 239            | 2                      | Wind                                            | Colorado Parks and Wildlife                  | Colorado Least Tern nesting and foraging sites                               | NA           | NA            | NA                  | NA        | NA        | NA       | NA            |
| 248            | 2                      | All                                             | Contact TNC MT chapter for more information. | Montana Wetland Areas                                                        | NA           | NA            | NA                  | NA        | NA        | NA       | NA            |
| 249            | 2                      | All                                             | WHSRN                                        | Globally important wetlands                                                  | NA           | NA            | NA                  | NA        | NA        | NA       | NA            |
| 257            | 2                      | All                                             | BLM - WWWMP                                  | Sage Grouse Priority Habitat Management Area exclusion                       | NA           | NA            | EX                  | NA        | NA        | NA       | NA            |
| 258            | 2                      | All                                             | BLM - WWWMP                                  | Sage Grouse Priority Habitat Management Area, High Level Siting Requirements | NA           | NA            | HLSC                | NA        | NA        | NA       | NA            |
| 262            | 2                      | All                                             | BLM - WWWMP                                  | critical habitat                                                             | NA           | NA            | HLSC                | NA        | NA        | NA       | NA            |
| 263            | 2                      | All                                             | BLM - WWWMP                                  | Special Recreation Management Area                                           | NA           | NA            | HLSC                | EX        | NA        | NA       | NA            |
| 266            | 2                      | Wind                                            | TNC                                          | GreaterSageGrousePACs.gdb                                                    | NA           | NA            | NA                  | NA        | NA        | NA       | NA            |
| 271            | 2                      | Wind and solar only, geothermal is an exception | County government                            | Imperial County: areas outside Renewable Energy Overlay                      | NA           | NA            | NA                  | NA        | NA        | NA       | NA            |
| 272            | 2                      | All                                             | County government                            | Inyo County: areas outside Solar Energy Development Areas (SEDAs)            | NA           | NA            | NA                  | NA        | NA        | NA       | NA            |
| 302            | 2                      | All                                             | The Nature Conservancy                       | GAP_SisPNW_V2_20200326                                                       | NA           | NA            | NA                  | NA        | NA        | NA       | NA            |
| 307            | 2                      | All                                             | Montana Natural Heritage Program             | Montana_GrSageGrouseLeks_4mileBuffers.shp                                    | NA           | NA            | NA                  | NA        | NA        | NA       | NA            |
| 310            | 2                      | All                                             | Wyoming Game and Fish                        | WYSageGrouseCoreAreasVer4_WGFD2015                                           | NA           | NA            | NA                  | NA        | NA        | NA       | NA            |
| 314            | 2                      | All                                             | Montana Natural Heritage                     | Montana Natural Heritage Program Threatened and Endangered Species           | NA           | NA            | NA                  | NA        | NA        | NA       | NA            |
| 18b            | 2                      | All                                             | Bureau of Land Management                    | Areas of Critical Environmental Concern                                      | NA           | NA            | NA                  | NA        | NA        | NA       | NA            |
| 92b            | 2                      | Wind                                            | Colorado Parks and Wildlife                  | CPW All Species Activity Mapping Data                                        | NA           | NA            | NA                  | NA        | NA        | NA       | NA            |

**Table S19. Datasets for Environmental Exclusion Category 3. Definitions: Exclude development (EX), Avoid development (AV), WECC Environmental Risk Class (RC 1, 2, 3, 4), BLM High Level Siting Considerations (HLSC), BLM Moderate Level Siting Considerations (MLSC), Information not available (NA). Study abbreviation and names: ORB 2015 (Optimal Renewable Energy Build-out), BLM WSEP (BLM Western Solar Energy Program), BLM WW-MP (BLM West-wide Wind Mapping Program), WECC (Western Electricity Coordinating Council Environmental Data Viewer), WREZ (Western Renewable Energy Zones), RETI CPUC (Renewable Energy Transmission Initiative of the California Public Utilities Commission)**

| Unique ID | Environmental Category | Technology | Data Publisher Organization                                                   | Dataset Name                                                                                                                                                   | ORB 2015 (7) | BLM WSEP (60) | BLM WWW-MP (7) | BLM DRECP (8) | WECC (61) | WREZ (4) | RETI CPUC (3) |
|-----------|------------------------|------------|-------------------------------------------------------------------------------|----------------------------------------------------------------------------------------------------------------------------------------------------------------|--------------|---------------|----------------|---------------|-----------|----------|---------------|
| 49        | 3                      | All        | Montana Dept of Fish Wildlife and Parks: Crucial Areas Planning System (CAPS) | Bighorn Sheep & Mountain Goat Habitat                                                                                                                          | AV           | NA            | NA             | NA            | RC 3      | NA       | NA            |
| 103       | 3                      | All        | BLM - WWWMP                                                                   | Visual Resource Management lands level III                                                                                                                     | NA           | NA            | MLSC           | NA            | NA        | NA       | NA            |
| 104       | 3                      | All        | Colorado Division of Wildlife                                                 | Species Activity Data: Severe Winter Range, Winter Concentration, Winter Range, Migration Patterns, and Migration Corridor                                     | NA           | NA            | NA             | NA            | RC 3      | NA       | NA            |
| 105       | 3                      | All        | Montana Dept of Fish Wildlife and Parks: Crucial Areas Planning System (CAPS) | Big Game Winter Range Habitat                                                                                                                                  | NA           | NA            | NA             | NA            | RC 3      | NA       | NA            |
| 111       | 3                      | All        | Federal Highway Administration                                                | America's Byways                                                                                                                                               | NA           | NA            | NA             | NA            | RC 2      | NA       | NA            |
| 112       | 3                      | All        | Caltrans                                                                      | California Scenic Highways                                                                                                                                     | NA           | NA            | NA             | NA            | RC 2      | NA       | NA            |
| 113       | 3                      | All        | Idaho Department of Transportation                                            | Scenic Byways of Idaho                                                                                                                                         | NA           | NA            | NA             | NA            | RC 2      | NA       | NA            |
| 114       | 3                      | All        | Colorado Department of Transportation                                         | Colorado Scenic and Historic Byways                                                                                                                            | NA           | NA            | NA             | NA            | RC 2      | NA       | NA            |
| 115       | 3                      | All        | Washington State Department of Transportation                                 | Washington Scenic Highways                                                                                                                                     | NA           | NA            | NA             | NA            | RC 2      | NA       | NA            |
| 118       | 3                      | All        | Wyoming Game and Fish                                                         | Shapafie: WYPrairieDogComplexes_WGFDWAFWA.                                                                                                                     | NA           | NA            | NA             | NA            | NA        | NA       | NA            |
| 121       | 3                      | Wind       | Wyoming Natural Heritage Program                                              | WYGrasslandBirds                                                                                                                                               | NA           | NA            | NA             | NA            | NA        | NA       | NA            |
| 123       | 3                      | All        | WDFW                                                                          | Deer Areas (Polygons)                                                                                                                                          | NA           | NA            | NA             | NA            | NA        | NA       | NA            |
| 124       | 3                      | All        | WDFW                                                                          | Elk Areas (Polygons)                                                                                                                                           | NA           | NA            | NA             | NA            | NA        | NA       | NA            |
| 125       | 3                      | All        | U.S. Fish and Wildlife Service                                                | USFWS Upland Species Recovery Units                                                                                                                            | AV           | NA            | NA             | NA            | NA        | NA       | NA            |
| 126       | 3                      | All        | California Department of Conservation                                         | Williamson act -Farmland Mapping and Monitoring Program (FMMP) in CA                                                                                           | Cat3         | NA            | NA             | NA            | EX        | EX       | EX            |
| 127       | 3                      | All        | The Nature Conservancy                                                        | Mojave Desert Ecoregional Assessment                                                                                                                           | Cat3         | NA            | NA             | NA            | NA        | NA       | NA            |
| 129       | 3                      | All        | Herpetological Conservation and Biology                                       | Mojave Desert Tortoise Linkages                                                                                                                                | Cat3         | NA            | MLSC           | NA            | NA        | NA       | NA            |
| 133       | 3                      | All        | BLM - WWWMP                                                                   | Desert Tortoise Connectivity                                                                                                                                   | NA           | NA            | MLSC           | NA            | NA        | NA       | NA            |
| 136       | 3                      | All        | TNC                                                                           | High integrity grasslands                                                                                                                                      | NA           | NA            | NA             | NA            | NA        | NA       | NA            |
| 137       | 3                      | Wind       | Playa Lakes Joint Venture                                                     | Playa clusters                                                                                                                                                 | NA           | NA            | NA             | NA            | NA        | NA       | NA            |
| 138       | 3                      | Wind       | Colorado Parks and Wildlife                                                   | Greater prairie-chicken optimal habitat                                                                                                                        | NA           | NA            | NA             | NA            | NA        | NA       | NA            |
| 139       | 3                      | All        | Colorado Natural Heritage Program                                             | Potential Conservation Areas                                                                                                                                   | NA           | NA            | NA             | NA            | NA        | NA       | NA            |
| 140       | 3                      | Wind       | Colorado Parks and Wildlife                                                   | Columbian sharp-tail grouse production areas and winter range                                                                                                  | NA           | NA            | NA             | NA            | NA        | NA       | NA            |
| 141       | 3                      | Wind       | Colorado Parks and Wildlife                                                   | Plains sharp-tail grouse concentration areas, winter concentration areas, migratory corridors, severe winter range                                             | NA           | NA            | NA             | NA            | NA        | NA       | NA            |
| 142       | 3                      | All        | Colorado Parks and Wildlife                                                   | Pronghorn                                                                                                                                                      | NA           | NA            | NA             | NA            | NA        | NA       | NA            |
| 143       | 3                      | Wind       | Colorado Parks and Wildlife                                                   | Least tern production areas and foraging areas                                                                                                                 | NA           | NA            | NA             | NA            | NA        | NA       | NA            |
| 144       | 3                      | Wind       | Colorado Parks and Wildlife                                                   | Piping plover production areas and foraging areas                                                                                                              | NA           | NA            | NA             | NA            | NA        | NA       | NA            |
| 145       | 3                      | Wind       | Colorado Parks and Wildlife                                                   | CPW Nest area and potential nesting area                                                                                                                       | NA           | NA            | NA             | NA            | NA        | NA       | NA            |
| 146       | 3                      | Wind       | Wyoming Natural Heritage Program                                              | Tree roosting bats (Silver-haired bat, Hoary, Eastern Red)                                                                                                     | NA           | NA            | NA             | NA            | NA        | NA       | NA            |
| 148       | 3                      | All        | New Mexico Department of Game and Fish                                        | Big Game Priority Habitat                                                                                                                                      | NA           | NA            | NA             | NA            | RC 3      | NA       | NA            |
| 149       | 3                      | All        | Oregon Department of Fish and Wildlife                                        | Elk and Deer Winter Range                                                                                                                                      | NA           | NA            | NA             | NA            | RC 3      | NA       | NA            |
| 150       | 3                      | All        | New Mexico Department of Transportation                                       | New Mexico State and National Scenic Byways                                                                                                                    | NA           | NA            | NA             | NA            | RC 2      | NA       | NA            |
| 151       | 3                      | All        | Oregon Department of Transportation                                           | Oregon Scenic Byways                                                                                                                                           | NA           | NA            | NA             | NA            | RC 2      | NA       | NA            |
| 152       | 3                      | All        | Wyoming Department of Transportation                                          | Wyoming Scenic Highways and Byways                                                                                                                             | NA           | NA            | NA             | NA            | RC 2      | NA       | NA            |
| 155       | 3                      | All        | USFWS                                                                         | Columbian white-tailed deer                                                                                                                                    | NA           | NA            | NA             | NA            | NA        | NA       | NA            |
| 156       | 3                      | All        | BLM                                                                           | BLM Nominated ACECs                                                                                                                                            | NA           | NA            | NA             | NA            | NA        | NA       | NA            |
| 157       | 3                      | All        | TNC                                                                           | TNC Nominated ACECs. Areas with high conservation value as determined through TNC ecoregional analysis (if/when they become ACEC they would move up to Cat 2). | NA           | NA            | NA             | NA            | NA        | NA       | NA            |
| 159       | 3                      | All        | TNC OR                                                                        | The Nature Conservancy Portfolio Areas                                                                                                                         | Cat3         | NA            | NA             | NA            | NA        | NA       | NA            |
| 160       | 3                      | All        | ODFW                                                                          | Oregon Conservation Strategy                                                                                                                                   | NA           | NA            | NA             | NA            | NA        | NA       | NA            |
| 161       | 3                      | All        | TNC                                                                           | TNC Nevada priority landscapes layer                                                                                                                           | NA           | NA            | NA             | NA            | NA        | NA       | NA            |
| 162       | 3                      | All        | NDOW                                                                          | Critical habitat rank 1 or 2                                                                                                                                   | NA           | NA            | NA             | NA            | NA        | NA       | NA            |
| 164       | 3                      | All        | Arizona Department of Roads                                                   | Arizona Scenic Roads                                                                                                                                           | NA           | NA            | NA             | NA            | RC 2      | NA       | NA            |



**Table S19. Datasets for Environmental Exclusion Category 3. Definitions: Exclude development (EX), Avoid development (AV), WECC Environmental Risk Class (RC 1, 2, 3, 4), BLM High Level Siting Considerations (HLSC), BLM Moderate Level Siting Considerations (MLSC), Information not available (NA). Study abbreviation and names: ORB 2015 (Optimal Renewable Energy Build-out), BLM WSEP (BLM Western Solar Energy Program), BLM WWW-MP (BLM West-wide Wind Mapping Program), WECC (Western Electricity Coordinating Council Environmental Data Viewer), WREZ (Western Renewable Energy Zones), RETI CPUC (Renewable Energy Transmission Initiative of the California Public Utilities Commission)**

| Unique ID | Environmental Category | Technology | Data Publisher Organization                                 | Dataset Name                                                                             | ORB 2015 (7) | BLM WSEP (60) | BLM WWW-MP (?) | BLM DRECP (8) | WECC (61) | WREZ (4) | RETI CPUC (3) |
|-----------|------------------------|------------|-------------------------------------------------------------|------------------------------------------------------------------------------------------|--------------|---------------|----------------|---------------|-----------|----------|---------------|
| 170       | 3                      | All        | CEC and USGS, Las Vegas Field Station                       | Mohave Ground Squirrel (candidate species) Maxent site suitability model at 0.438 cutoff | Cat4         | NA            | NA             | NA            | NA        | NA       | NA            |
| 187       | 3                      | All        | TNC                                                         | The Nature Conservancy Portfolio Areas                                                   | NA           | NA            | NA             | NA            | NA        | NA       | NA            |
| 241       | 3                      | All        | Colorado natural Heritage Program                           | Potential Conservation Areas (CO)                                                        | NA           | NA            | NA             | NA            | NA        | NA       | NA            |
| 259       | 3                      | All        | BLM - WWWMP                                                 | Sage Grouse General Habitat Management Area, High Level Siting Requirements              | NA           | NA            | HLSC           | NA            | NA        | NA       | NA            |
| 260       | 3                      | All        | BLM - WWWMP                                                 | Sage Grouse General Habitat Management Area, Moderate Level Siting Requirements          | NA           | NA            | MLSC           | NA            | NA        | NA       | NA            |
| 261       | 3                      | All        | BLM - WWWMP                                                 | Sagebrush Focal Area                                                                     | NA           | NA            | EX             | NA            | NA        | NA       | NA            |
| 267       | 3                      | All        | NRCS                                                        | Westwide Prime farmland classification                                                   | NA           | NA            | NA             | NA            | NA        | NA       | EX            |
| 268       | 3                      | All        | TNC                                                         | Priority Conservation Areas                                                              | NA           | NA            | NA             | NA            | NA        | NA       | NA            |
| 269       | 3                      | All        | NatureServe                                                 | Mojave Desert Tortoise Species Distribution Model - Threshold                            | NA           | NA            | NA             | NA            | NA        | NA       | NA            |
| 300       | 3                      | All        | Bureau of Land Management                                   | Desert Tortoise (gopherus agassizii) suitable habitat in Arizona                         | NA           | NA            | NA             | NA            | NA        | NA       | NA            |
| 303       | 3                      | All        | The Nature Conservancy                                      | GAP_SisPNW_V2_20200326                                                                   | NA           | NA            | NA             | NA            | NA        | NA       | NA            |
| 304       | 3                      | All        | NDOW                                                        | Occupied_x_Distribution                                                                  | NA           | NA            | NA             | NA            | NA        | NA       | NA            |
| 305       | 3                      | All        | NDOW                                                        | Movement Corridors                                                                       | NA           | NA            | NA             | NA            | NA        | NA       | NA            |
| 308       | 3                      | All        | USFWS                                                       | Grassland Birds Predicted Core Areas                                                     | NA           | NA            | NA             | NA            | NA        | NA       | NA            |
| 309       | 3                      | All        | TNC MT                                                      | The Nature Conservancy Portfolio Areas                                                   | NA           | NA            | NA             | NA            | NA        | NA       | NA            |
| 312       | 3                      | All        | Idaho Department of Fish and Game                           | Idaho Crucial Habitat                                                                    | NA           | NA            | NA             | NA            | NA        | NA       | NA            |
| 313       | 3                      | All        | New Mexico Department of Fish and Game and Natural Heritage | New Mexico Crucial Habitat                                                               | NA           | NA            | NA             | NA            | NA        | NA       | NA            |
| 315       | 3                      | All        | The Nature Conservancy                                      | Resilient Connected Network                                                              | NA           | NA            | NA             | NA            | NA        | NA       | NA            |
| 157a      | 3                      | All        | The Nature Conservancy NV                                   | Areas of Critical Environmental Concern                                                  | NA           | NA            | NA             | NA            | NA        | NA       | NA            |
| 157b      | 3                      | All        | TNC OR                                                      | The Nature Conservancy Portfolio Areas                                                   | NA           | NA            | NA             | NA            | NA        | NA       | NA            |
| 173       | 3                      | All        | AGFD                                                        | AZ multi-species corridors                                                               | NA           | NA            | NA             | NA            | NA        | NA       | NA            |

**Table S20. Offshore Wind Datasets for Environmental Exclusion Categories.**

| Unique Data ID | Environmental Category | Technology | Data Publisher Organization                                                       | Dataset Name                                                                       |
|----------------|------------------------|------------|-----------------------------------------------------------------------------------|------------------------------------------------------------------------------------|
| 1              | 1                      | Offshore   | Protected Seas                                                                    | Marine Managed Areas (Most Restrictive)                                            |
| 2              | 1                      | Offshore   | NOAA                                                                              | Marine Protected Areas (No Take)                                                   |
| 3              | 1                      | Offshore   | Oregon Coastal Management Program Department of Land Conservation and Development | Oregon Territorial Sea Plan Part Five, 2019 (Renewable Energy Exclusion Area)      |
| 4              | 2                      | Offshore   | Protected Seas                                                                    | Marine Managed Areas (Heavily Restrictive and Moderately Restrictive)              |
| 5              | 2                      | Offshore   | NOAA                                                                              | Marine Protected Areas (No Access)                                                 |
| 6              | 2                      | Offshore   | Oregon Coastal Management Program Department of Land Conservation and Development | Oregon Territorial Sea Plan Part Five, 2019 (Resources and Uses Management Area)   |
| 7              | 2                      | Offshore   | NOAA                                                                              | Habitat Areas of Particular Concern within Essential Fish Habitat                  |
| 8              | 3                      | Offshore   | Washington State Ocean Caucus                                                     | Ecologically Important Areas                                                       |
| 9              | 3                      | Offshore   | The Nature Conservancy                                                            | Marine Portfolio Areas California                                                  |
| 10             | 3                      | Offshore   | The Nature Conservancy                                                            | Marine Portfolio Areas Pacific Northwest                                           |
| 11             | 3                      | Offshore   | Oregon Coastal Management Program Department of Land Conservation and Development | Oregon Territorial Sea Plan Part Five, 2019 (Resources and Uses Conservation Area) |
| 12             | 3                      | Offshore   | The Nature Conservancy                                                            | Oregon Rocky Substrate                                                             |
| 13             | 3                      | Offshore   | Oregon Department of Fish and Wildlife Marine Resources Program                   | Oregon Nearshore Ecological Data Atlas                                             |
| 14             | 3                      | Offshore   | The Nature Conservancy                                                            | California Bathymetry Complexity                                                   |

### 3. Additional results

**A. Energy modeling results.** In most net-zero economy-wide cases, electricity is needed not only to electrify many current fuel uses, but also to meet energy conversion loads that don't currently exist, including electrolysis, dual-fuel boilers, and direct air capture (DAC). Compared to Electricity Only cases, these new uses and loads resulted in a further 25-85% increase in electricity demand (Fig. S15A). Hydrogen from electrolysis was used directly in industry and heavy transportation, and also in synthesizing hydrocarbon fuels for applications such as jet fuel and chemical feedstocks. The amount of hydrogen needed for fuel synthesis depends on the extent of electrification and the availability of biomass or fossil fuels with emissions offsets.

In all net-zero cases, even Renewables Only, thermal generating capacity was needed (primarily gas combined cycle without carbon capture), along with energy storage and flexible loads, to balance electricity supply and demand in real time (Fig. S15C). Carbon constraints for thermal power plants were met by either burning carbon-neutral fuels (in the Renewables Only case), or by burning fossil natural gas and offsetting it with negative emissions.

During the 2020s, solar and wind build rates across all scenarios needed only modest increases relative to 2020. However, in 2030-2050, in all cases except Limited Wind and Solar, the rate of new generating capacity construction reached 3-9 times the maximum historic rate of 7 GW/year, with the lowest rates in the High Electrification case and the highest in the Renewables Only case (Fig. S16, Table S20). When the growth rate was constrained to the historic rate in the Limited Wind and Solar case, a large amount of nuclear and natural gas with CCS capacity was required to meet the net zero goal (Fig. S16). Put differently, avoiding a large build-out of nuclear and gas with CCS in order to meet climate goals requires an average build rate for wind and solar that is a minimum of 2-3 times the historic rate on average over the next three decades.

The rate of growth in biofuel production is also the greatest in the 2040s (Fig. S16, Fig. S18), when the growth in transportation electrification and clean fuels demand also reach their peak.

During the 2020s, modeled renewable build rates across all scenarios needed only modest increases relative to 2020. However, over the subsequent 20 years, the build rate requirements dramatically increased. Between 2030 and 2050, the High Electrification SL3 scenario had an average requirement of 17 GW (4 GW of wind, 13 GW of solar) per year, more than double the historical maximum rate (Fig. S16). These build rates increased further in the Slow Electrification and Renewables Only cases, reaching a maximum of 54 GW/year from 2046-2050 for solar in the Renewables Only scenario. The Limited Wind and Solar case, by contrast, had wind and solar build rates capped at the maximum historical level, resulting in the need for 4 GW of new clean firm resources annually from 2030 to 2050. The specific clean firm resources selected by the model changed over time from gas with CCS to geothermal to nuclear as a matter of economics, resulting in total installed capacities of 18.4 GW, 17.8 GW, and 50.7 GW respectively in 2050 (Table S20). For nuclear, existing capacity in the West is 5.2 GW, or 10% of the total capacity needed in this scenario by 2050. The model results show that if wind and solar build rates do not reach the required level, and if clean firm resources also cannot be built at the required rate, then an economy-wide net-zero target cannot be achieved by 2050 using the technologies commercially available today.

**B. Sensitivity results.** The In-State, Limited Biomass, and Limited Wind and Solar cases had the smallest new area requirements among net-zero cases, ranging from 55,000 to 78,000 km<sup>2</sup> (Fig. S13). The In-State case assumed restrictions on electricity transmission across regions. This resulted in using higher-cost solar located within southwestern states rather than importing lower-cost wind from states like Wyoming or New Mexico, raising costs (Fig. 5 in main text) but reducing the land needed for transmission and onshore wind. The Limited Biomass assumptions avoided the land needed for purpose-grown biomass but increased the land needed for wind and solar capacity for synthetic fuel production to compensate; the net effect was a reduction in land use (Figs. S13, S20). The Limited Wind and Solar case had lower capacity of both wind and solar, significantly reducing land area requirements; additional capacity needs were met by nuclear and natural gas with CCS that require less land area.

Table S21. Summary of energy scenario results for 2050 for all decarbonization scenarios

| Indicator                                                                          | Units   | Reference |         | High Electrification |         |         | Limited Biomass | Limited Wind and Solar | In-state | Slow Electrification |         |         | Renewables Only |         |         |
|------------------------------------------------------------------------------------|---------|-----------|---------|----------------------|---------|---------|-----------------|------------------------|----------|----------------------|---------|---------|-----------------|---------|---------|
|                                                                                    |         | 2020      | 2050    | SL1                  | SL2     | SL3     | SL3             | SL3                    | SL3      | SL1                  | SL2     | SL3     | SL1             | SL2     | SL3     |
| <b>Emissions</b>                                                                   |         |           |         |                      |         |         |                 |                        |          |                      |         |         |                 |         |         |
| Gross Energy CO2                                                                   | Mt-CO2  | 807       | 851     | 61                   | 59      | 64      | 92              | 156                    | 68       | 95                   | 175     | 162     | 0               | 0       | 0       |
| Uncombusted & bunkered CO2                                                         | Mt-CO2  | -54       | -55     | -46                  | -45     | -45     | -45             | -45                    | -45      | -46                  | -45     | -45     | -45             | -45     | -45     |
| Geologically Sequestered CO2                                                       | Mt-CO2  | 0         | 0       | -60                  | -59     | -64     | -92             | -156                   | -68      | -94                  | -175    | -162    | 0               | 0       | 0       |
| Land Sink CO2                                                                      | Mt-CO2  | -88       | -71     | -104                 | -104    | -104    | -104            | -104                   | -104     | -104                 | -104    | -104    | -104            | -104    | -104    |
| Non-energy & Non-CO2                                                               | Mt-CO2e | 27        | 34      | 199                  | 199     | 199     | 199             | 199                    | 199      | 199                  | 199     | 199     | 199             | 199     | 199     |
| Net Emissions                                                                      | Mt-CO2e | 692       | 759     | 50                   | 50      | 50      | 50              | 50                     | 50       | 50                   | 50      | 50      | 50              | 50      | 50      |
| <b>Electricity (total generation and total capacity)</b>                           |         |           |         |                      |         |         |                 |                        |          |                      |         |         |                 |         |         |
| Total generation                                                                   | TWh     | 712       | 978     | 1922                 | 1959    | 1862    | 1998            | 1619                   | 1858     | 1967                 | 2100    | 2005    | 2504            | 2751    | 2763    |
| End-use load (w losses)                                                            | TWh     | 712       | 944     | 1529                 | 1532    | 1532    | 1533            | 1514                   | 1520     | 1283                 | 1287    | 1286    | 1531            | 1531    | 1536    |
| Fuel conversion load                                                               | TWh     | 0         | 34      | 393                  | 427     | 330     | 465             | 105                    | 338      | 684                  | 813     | 719     | 973             | 1220    | 1227    |
| Renewable curtailment                                                              | %       | 0.7%      | 3.4%    | 2.6%                 | 2.6%    | 2.5%    | 2.5%            | 0.4%                   | 2.5%     | 2.4%                 | 2.3%    | 2.1%    | 2.3%            | 2.2%    | 1.9%    |
| Wind                                                                               | GW      | 27.2      | 50.1    | 195.9                | 192     | 144.5   | 154.6           | 95.8                   | 129.6    | 216.9                | 225.3   | 158.9   | 254.4           | 263.1   | 178.3   |
| Offshore wind                                                                      | GW      | 0         | 3.7     | 15.3                 | 15      | 16      | 18.2            | 27.3                   | 19.9     | 7.4                  | 20.6    | 23.9    | 16.9            | 19      | 27.2    |
| Onshore wind                                                                       | GW      | 27.2      | 46.4    | 180.6                | 177     | 128.5   | 136.4           | 68.5                   | 109.7    | 209.5                | 204.7   | 135     | 237.5           | 244.1   | 151.1   |
| Solar                                                                              | GW      | 39.4      | 136.2   | 331.8                | 373     | 413.9   | 454.7           | 198.1                  | 440      | 308.5                | 370.7   | 454.5   | 489.5           | 587.6   | 744.2   |
| Rooftop solar                                                                      | GW      | 14        | 34.5    | 34.5                 | 57.5    | 80.5    | 80.5            | 89.7                   | 80.5     | 34.5                 | 57.5    | 80.5    | 34.5            | 57.5    | 80.5    |
| Urban infill solar                                                                 | GW      | 0.3       | 31.5    | 31.5                 | 52.5    | 73.5    | 73.5            | 73.5                   | 92.3     | 31.5                 | 52.5    | 73.5    | 31.5            | 52.5    | 100.3   |
| Large-scale solar                                                                  | GW      | 25.1      | 70.2    | 265.8                | 263     | 259.9   | 300.7           | 34.9                   | 267.2    | 242.5                | 260.7   | 300.5   | 423.5           | 477.6   | 563.4   |
| Storage                                                                            | GW      | 5.4       | 11.6    | 47.4                 | 57.9    | 80.3    | 89.8            | 23.4                   | 95.2     | 36.3                 | 50.9    | 80.6    | 52.6            | 64.2    | 101.3   |
| Hydro                                                                              | GW      | 50        | 47.8    | 48.7                 | 49.2    | 49.8    | 49.8            | 50                     | 49.8     | 49.2                 | 49.9    | 49.9    | 49.1            | 49.2    | 49.9    |
| Biomass                                                                            | GW      | 1.7       | 0.4     | 2.7                  | 1.5     | 1.9     | 1.6             | 2.1                    | 2.6      | 4                    | 1.9     | 2.3     | 1.1             | 0.5     | 0.6     |
| Geothermal                                                                         | GW      | 2.4       | 5.7     | 14.9                 | 15      | 17.5    | 17.4            | 17.8                   | 17.5     | 14.9                 | 15      | 15      | 14.9            | 14.9    | 16.2    |
| Nuclear                                                                            | GW      | 7.5       | 5.3     | 5.2                  | 5.3     | 5.3     | 5.3             | 50.7                   | 5.3      | 5.3                  | 5.3     | 5.3     | 0               | 0       | 0       |
| Coal                                                                               | GW      | 24.3      | 10      | 0                    | 0.1     | 0.1     | 0.1             | 0.1                    | 0.1      | 0.1                  | 0.1     | 0.1     | 0               | 0       | 0       |
| Gas                                                                                | GW      | 79.5      | 67.2    | 81.8                 | 81.3    | 80.8    | 78.6            | 73.8                   | 82.8     | 54                   | 50.3    | 51.2    | 75.2            | 74.5    | 75      |
| Gas Capacity Factor                                                                | %       | 33%       | 38%     | 4%                   | 3%      | 4%      | 2%              | 2%                     | 4%       | 2%                   | 2%      | 2%      | 2%              | 1%      | 1%      |
| Gas w/ CCS                                                                         | GW      | 0         | 0.2     | 0.2                  | 1.4     | 2.9     | 2.6             | 18.4                   | 5        | 0.2                  | 0.2     | 0.3     | 0.1             | 0.1     | 0.1     |
| <b>Transmission Capacity</b>                                                       |         |           |         |                      |         |         |                 |                        |          |                      |         |         |                 |         |         |
| Gas w/ CCS                                                                         | GW      | 24.3      | 10      | 0                    | 0.1     | 0.1     | 0.1             | 0.1                    | 0.1      | 0.1                  | 0.1     | 0.1     | 0               | 0       | 0       |
| Total Transmission capacity                                                        | GW      | 67        | 70      | 104                  | 105     | 98      | 98              | 79                     | 76       | 103                  | 103     | 93      | 114             | 113     | 103     |
| New Transmission Capacity                                                          | GW      | 0         | 34      | 34                   | 27      | 27      | 27              | 7                      | 7        | 32                   | 31      | 22      | 44              | 43      | 32      |
| New Renewables Spurline Capacity                                                   | GW      | 89        | 424     | 422                  | 353     | 403     | 403             | 70                     | 346      | 434                  | 443     | 402     | 648             | 708     | 687     |
| New HV Transmission Miles                                                          | Miles   | 0         | 6,632   | 5,737                | 6,259   | 6,259   | 6,259           | 2,341                  | 0        | 6,325                | 5,737   | 5,849   | 8,421           | 7,458   | 6,713   |
| Reconducted or Co-located Tx Miles                                                 | Miles   | 920       | 7,949   | 7,570                | 6,730   | 5,960   | 5,960           | 2,286                  | 3,736    | 10,745               | 10,178  | 7,176   | 10,004          | 10,027  | 7,549   |
| New Renewables Spurline Miles                                                      | Miles   | 25,233    | 119,819 | 146,729              | 133,108 | 143,997 | 143,997         | 45,260                 | 108,366  | 126,559              | 169,331 | 140,836 | 156,247         | 232,745 | 176,354 |
| <b>Biomass</b>                                                                     |         |           |         |                      |         |         |                 |                        |          |                      |         |         |                 |         |         |
| Consumption (direct + embodied)                                                    | EJ      | 0.76      | 1.37    | 3.2                  | 3.04    | 3.33    | 2.03            | 2.99                   | 3.34     | 5.08                 | 2.55    | 3.21    | 2.17            | 1.26    | 1.24    |
| Production                                                                         | EJ      | 0.58      | 0.66    | 0.89                 | 0.68    | 0.69    | 0.66            | 0.7                    | 0.69     | 1                    | 0.7     | 0.7     | 0.96            | 0.69    | 0.69    |
| <b>Carbon Capture Utilization and Storage</b>                                      |         |           |         |                      |         |         |                 |                        |          |                      |         |         |                 |         |         |
| E&I CO2 captured                                                                   | Mt      | 0         | 3       | 77                   | 76      | 73      | 108             | 156                    | 77       | 137                  | 213     | 194     | 68              | 88      | 88      |
| E&I CO2 utilized                                                                   | Mt      | 0         | 3       | 17                   | 17      | 9       | 16              | 0                      | 9        | 43                   | 38      | 32      | 68              | 88      | 88      |
| E&I CO2 sequestered                                                                | Mt      | 0         | 0       | 60                   | 59      | 64      | 92              | 156                    | 68       | 94                   | 175     | 162     | 0               | 0       | 0       |
| DAC Capacity                                                                       | Mt/year | 0         | 0       | 7                    | 19      | 9       | 54              | 32                     | 10       | 73                   | 178     | 155     | 17              | 51      | 53      |
| <b>Net Energy Supply Cost (Costs Shown Relative to "High Electrification SL1")</b> |         |           |         |                      |         |         |                 |                        |          |                      |         |         |                 |         |         |
| 2050 Levelized Cost                                                                | \$B     | NA        | NA      | 0                    | 4.7     | 7.8     | 10.2            | 25.3                   | 9.7      | 38.8                 | 44.7    | 49.2    | 10.0            | 16.6    | 23.4    |
| NPV Cost (2020-2050)                                                               | \$B     | NA        | NA      | 0                    | 45      | 74      | 86              | 154                    | 85       | 505                  | 586     | 620     | 64              | 111     | 154     |

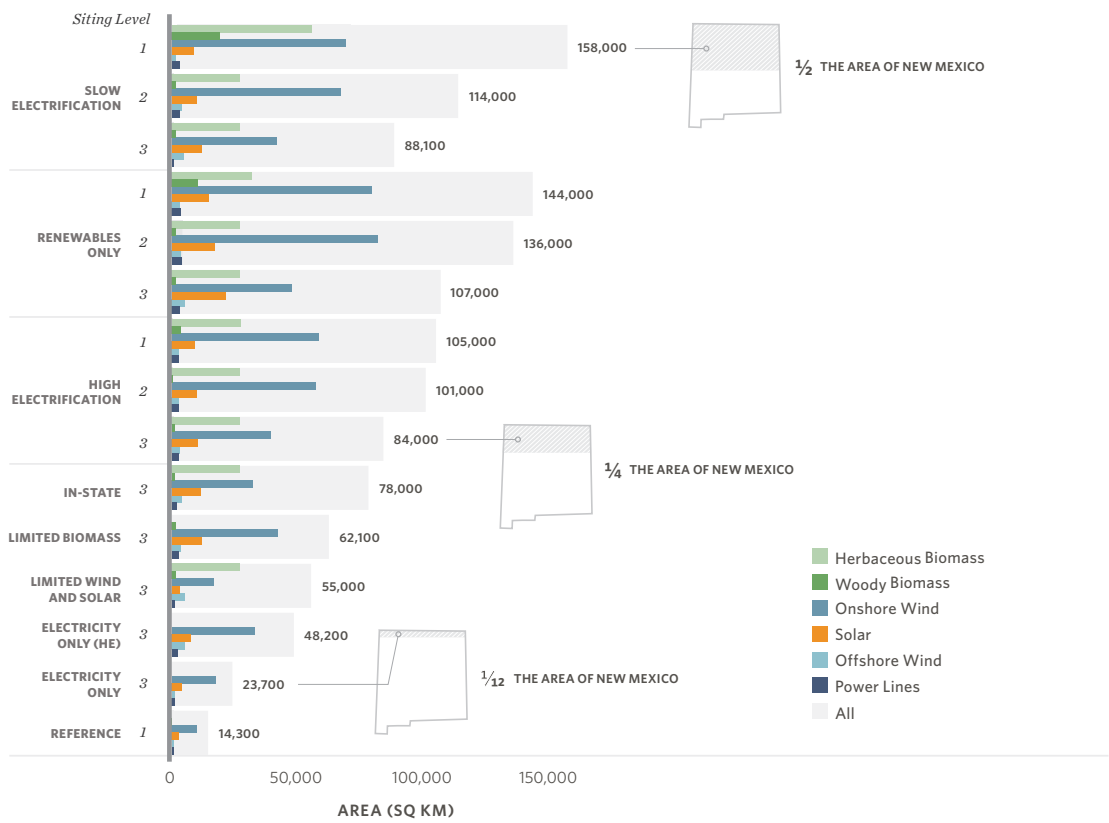

**Fig. S13.** Land and ocean area for renewable resource and additional biomass resources required in 2050 for all scenarios. This figure is the same as Figure 1 in the main paper, except that it includes the sensitivity energy cases, In-State, Limited Biomass, the Limited Wind and Solar. See Figure 1 for the complete caption.

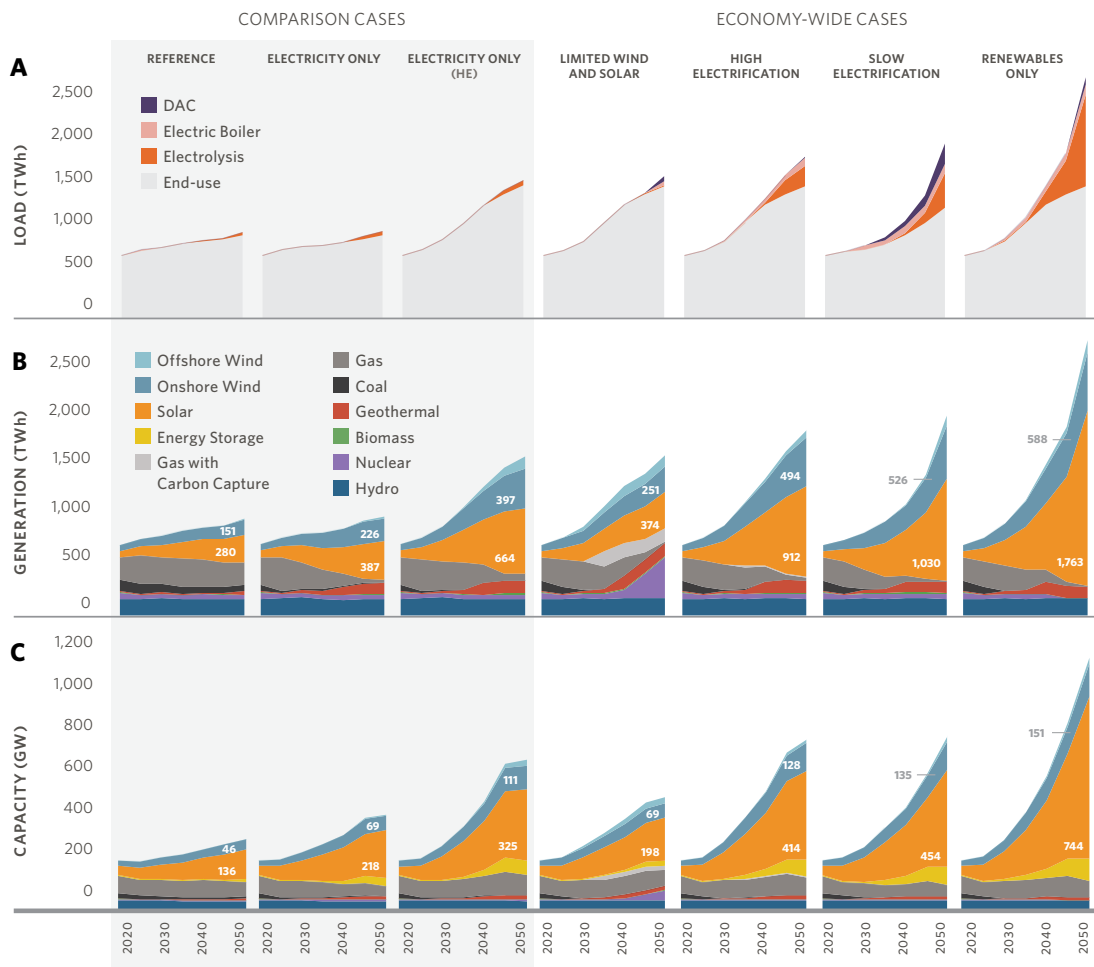

**Fig. S14.** Electricity demand (Load) (A), generation (B), and installed capacity (C) across the western U.S. for scenarios that achieve different decarbonization targets (reference, electricity only, and economy-wide net zero cases) or with different decarbonization pathways (High Electrification, Slow Electrification, Renewables Only). This figure is the same as Figure 2 in the main paper, except that it includes the sensitivity energy cases, In-State, Limited Biomass, the Limited Wind and Solar. See Figure 2 for the complete caption.



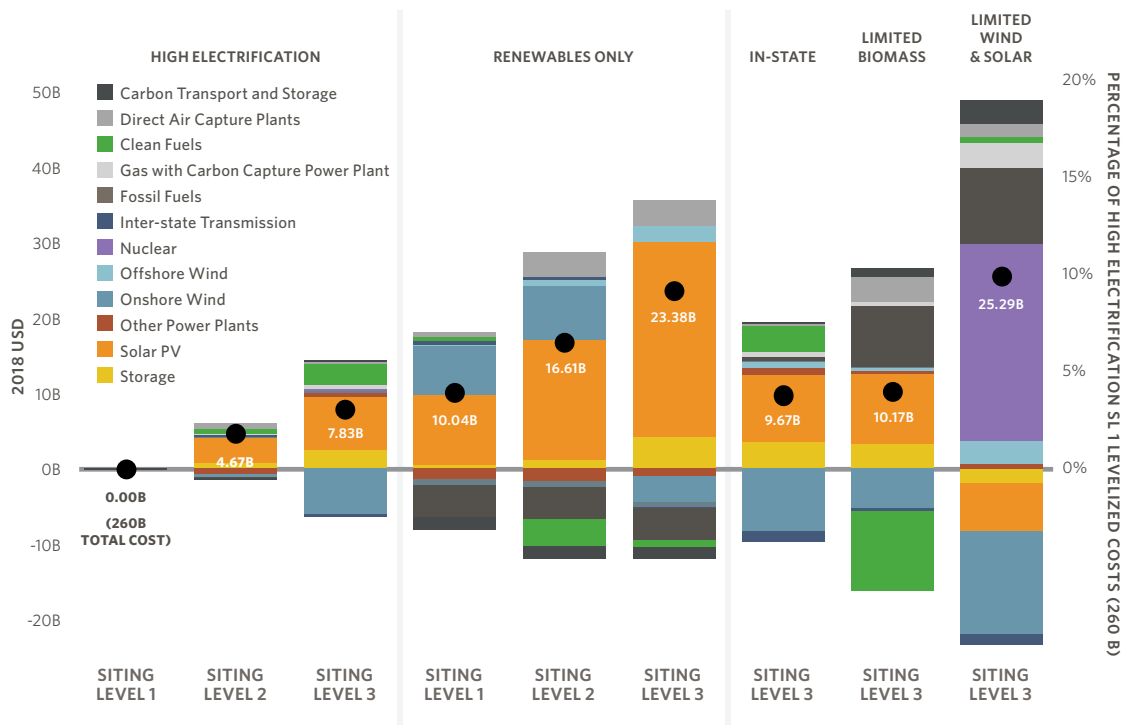

**Fig. S15.** Net annual levelized supply-side cost in 2050 for scenarios are shown relative to the High Electrification Siting Level 1 scenario. Bars above the x-axis represent and increase in costs while bars below represent a decrease in relative cost. This figure is the same as Figure 4 in the main paper, except that it includes the sensitivity energy cases, In-State, Limited Biomass, the Limited Wind and Solar. See Figure 4 for the complete caption.

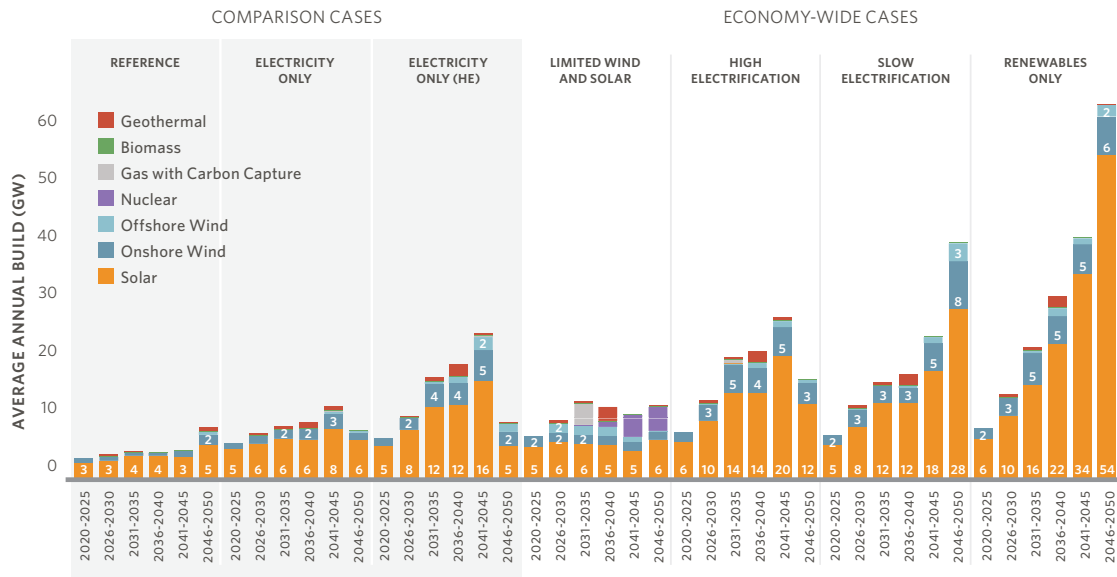

**Fig. S16.** Average annual generation capacity build rates by 5-year period for the reference case contrasted against different decarbonization cases using Siting Level 3 (SL3) protections

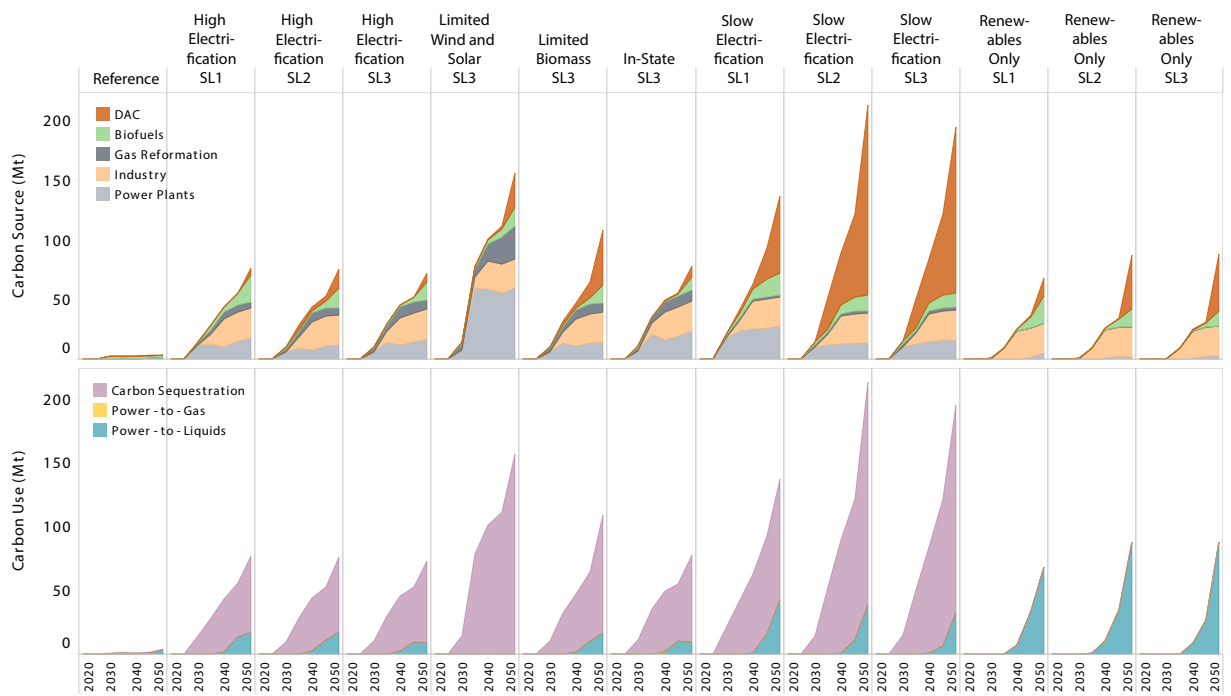

Fig. S17. Carbon emissions, storage, and use

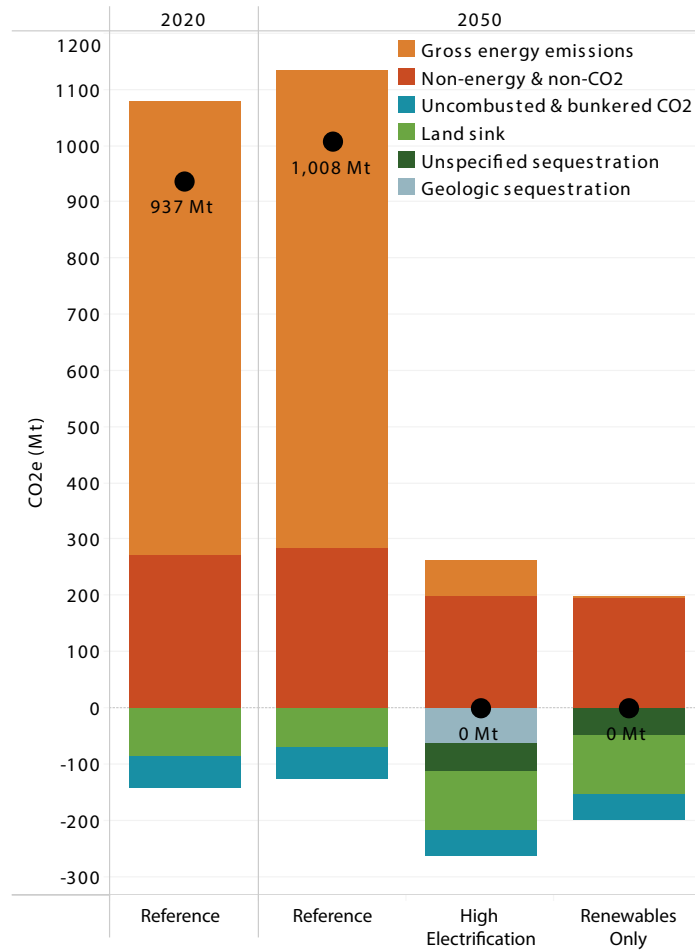

Fig. S18. Carbon emissions accounting

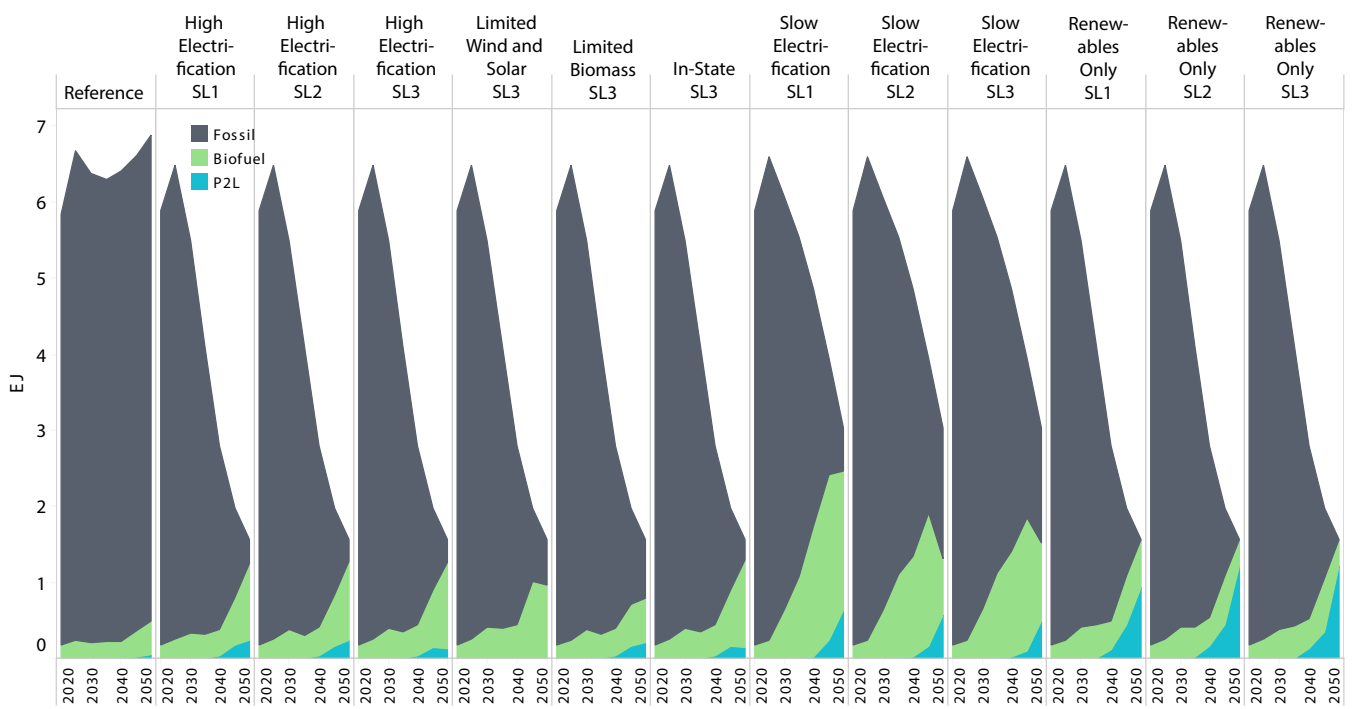

Fig. S19. Fuel sources



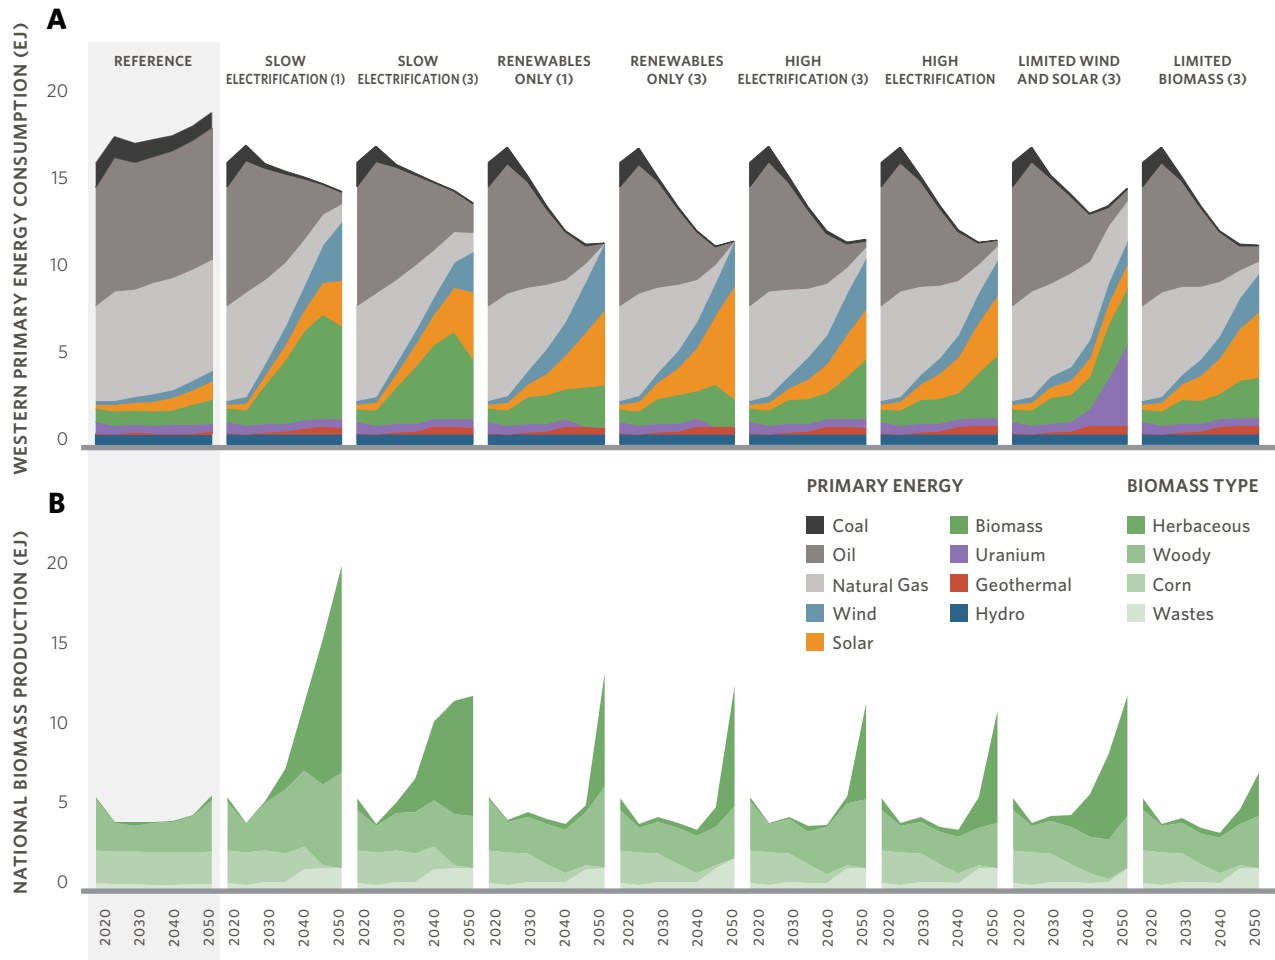

Fig. S20. Primary energy and biomass use

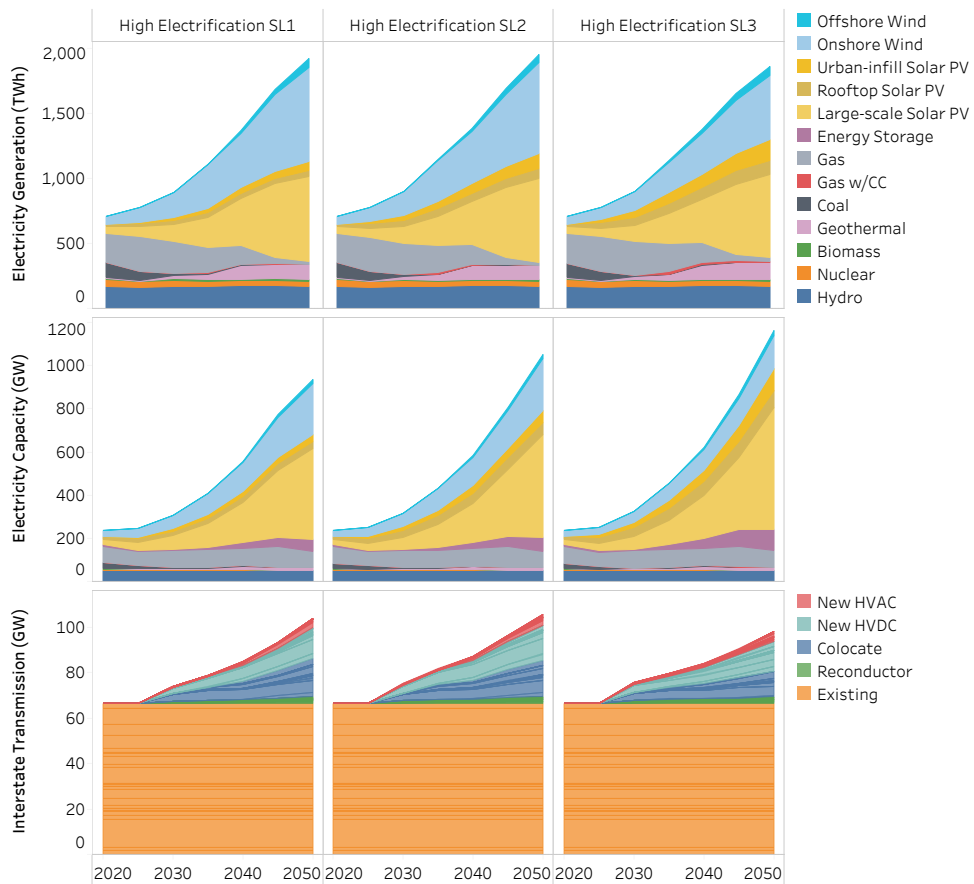

Fig. S21. Generation, capacity, and transmission for High Electrification Siting Levels 1-3.

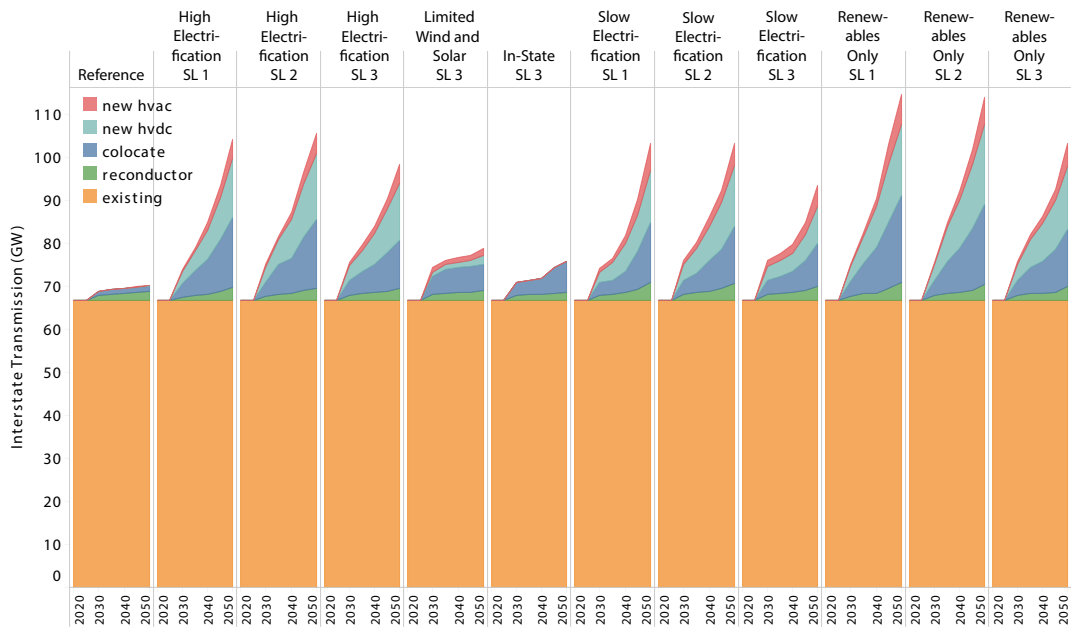

Fig. S22. Existing and new transmission capacity for the reference scenario and all decarbonization scenarios.

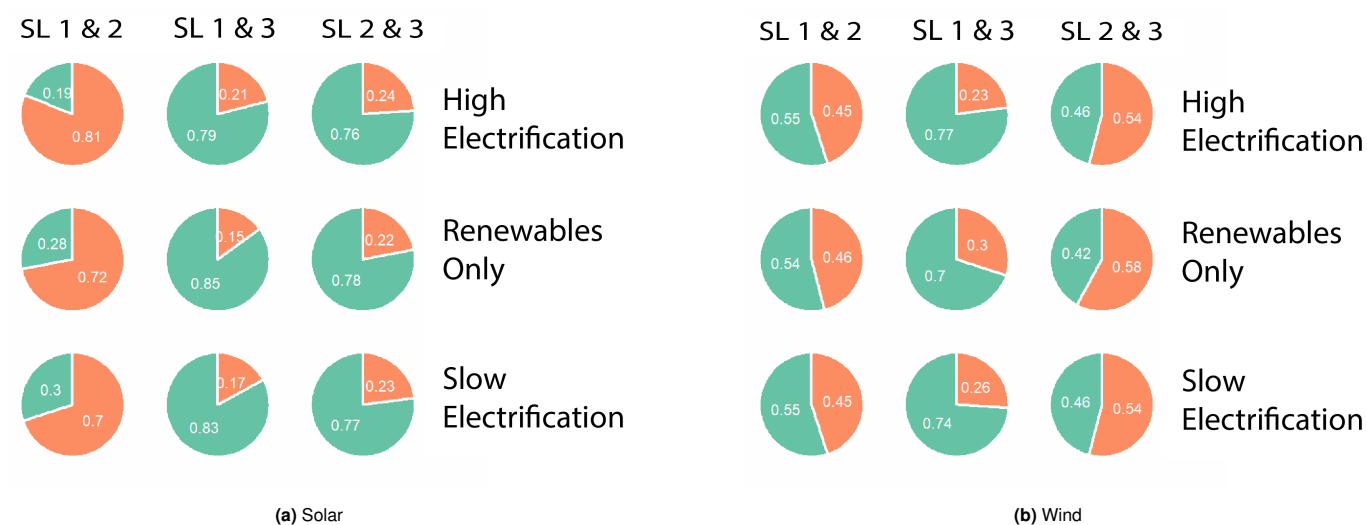

**Fig. S23.** Percentage overlap between Siting Levels for solar (a) and wind (b) selected project areas. "1 2" indicates overlap between Siting Levels 1 and 2 and "2 3" indicates overlap between Siting Levels 2 and 3.

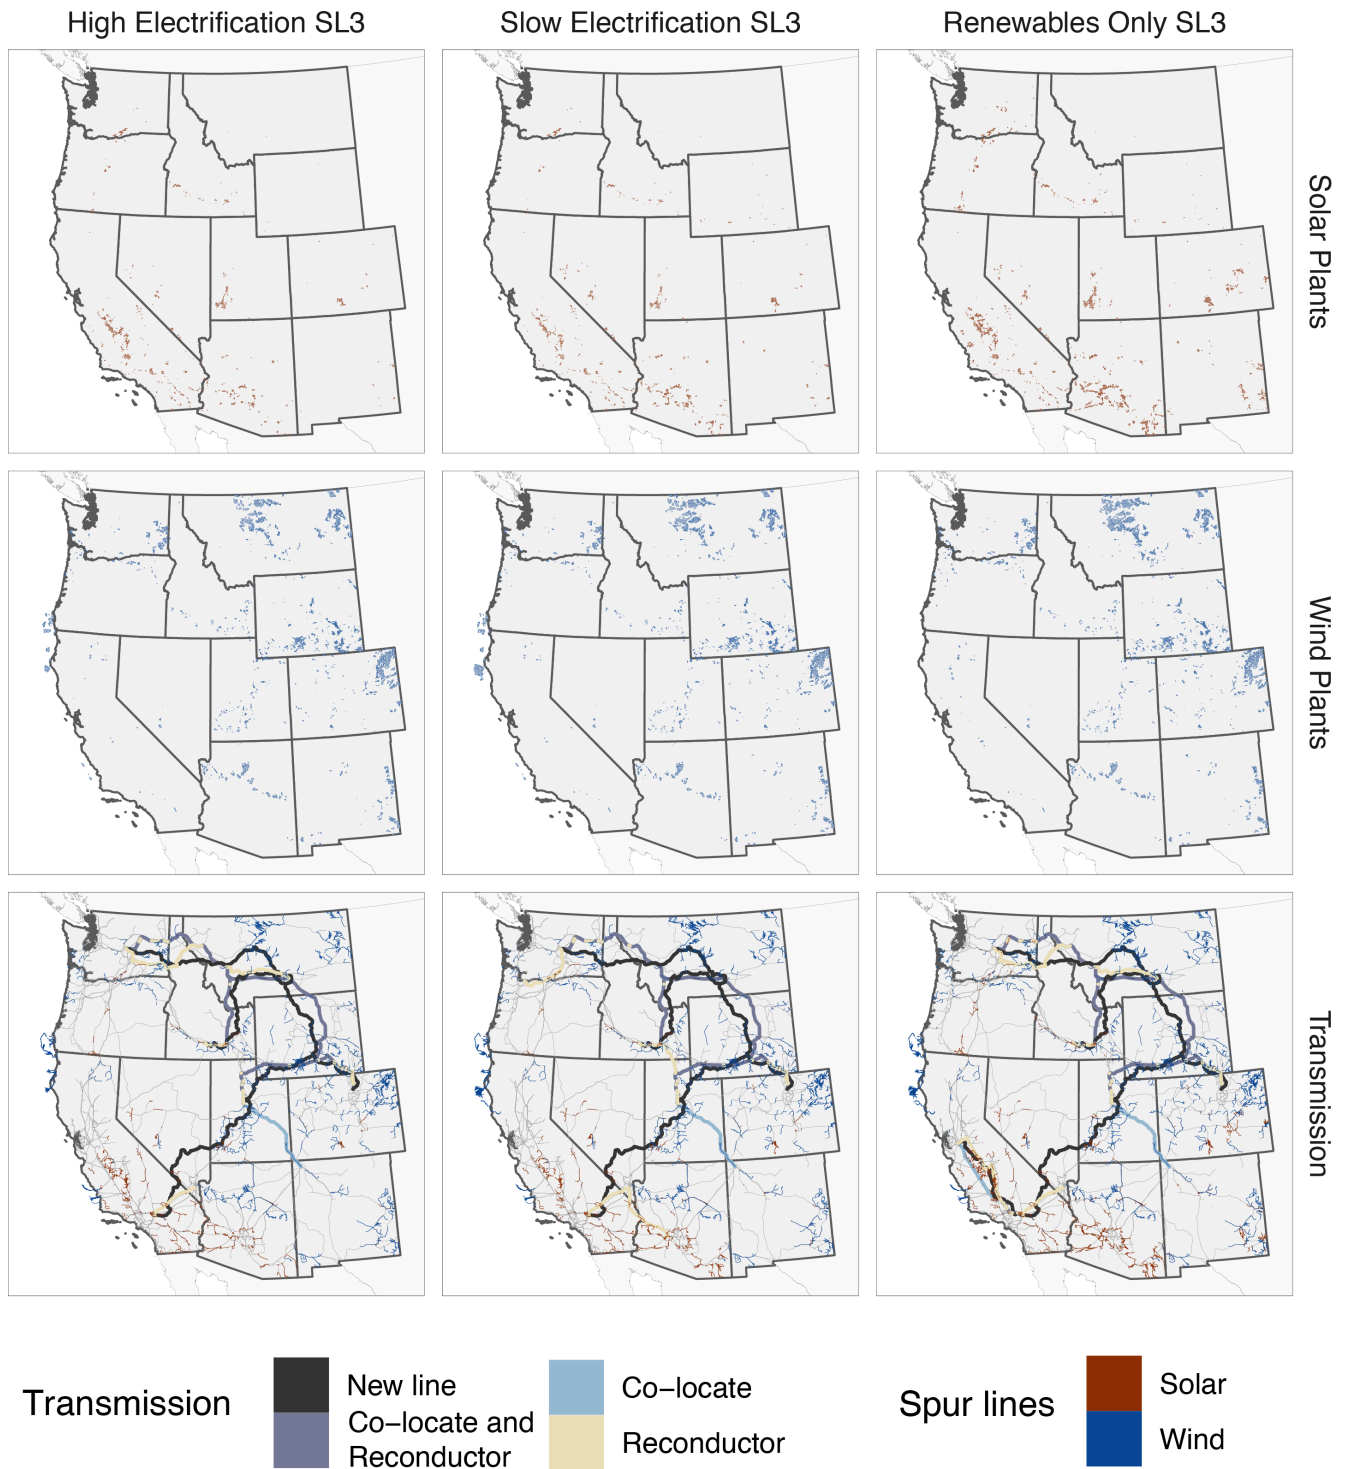

Fig. S24. Wind, solar, and power line build-out maps for Siting Level 3 of three main decarbonization cases (High Electrification, Slow Electrification, Renewables Only)

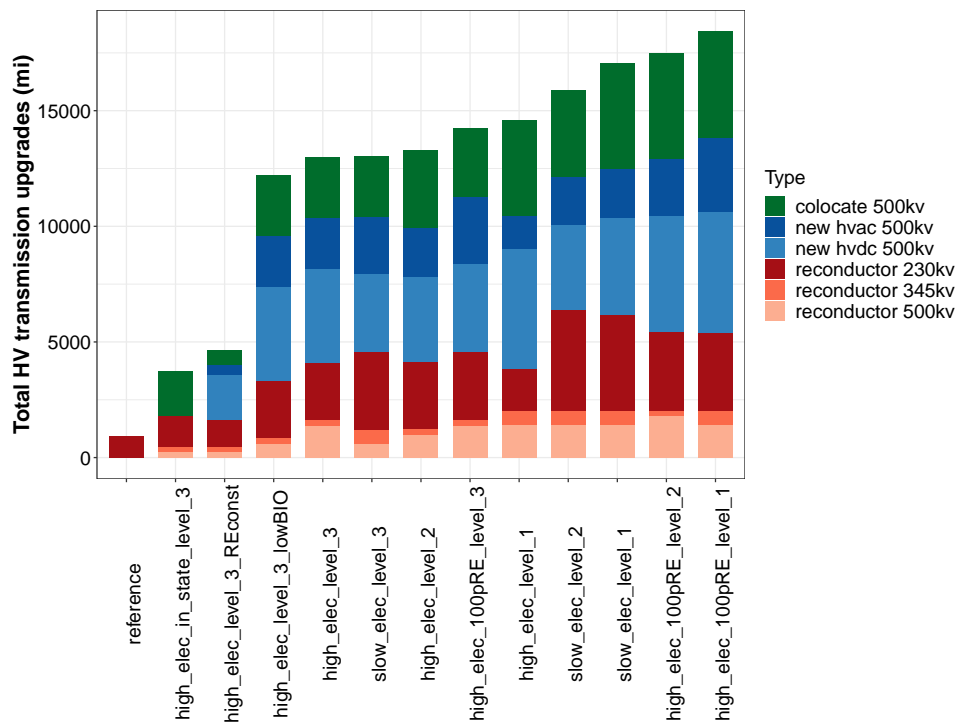

Fig. S25. Spatial downscaling results showing total transmission upgrades in each scenario

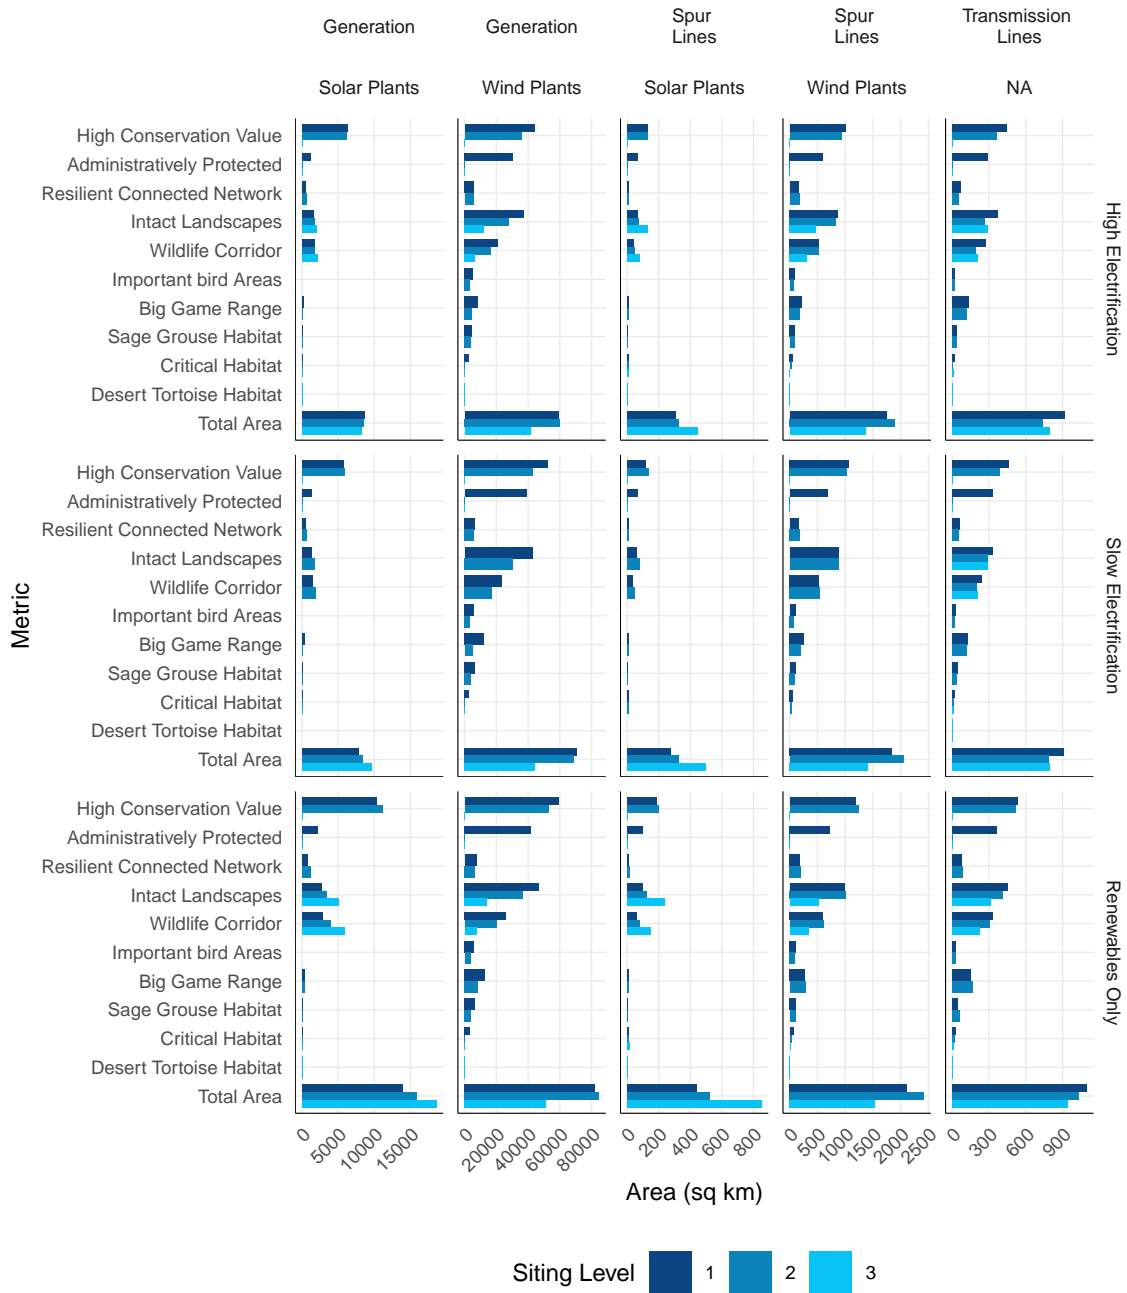

Fig. S26. Environmental metrics for generation, transmission, and spur lines for the three core economy-wide cases at all Siting Levels.



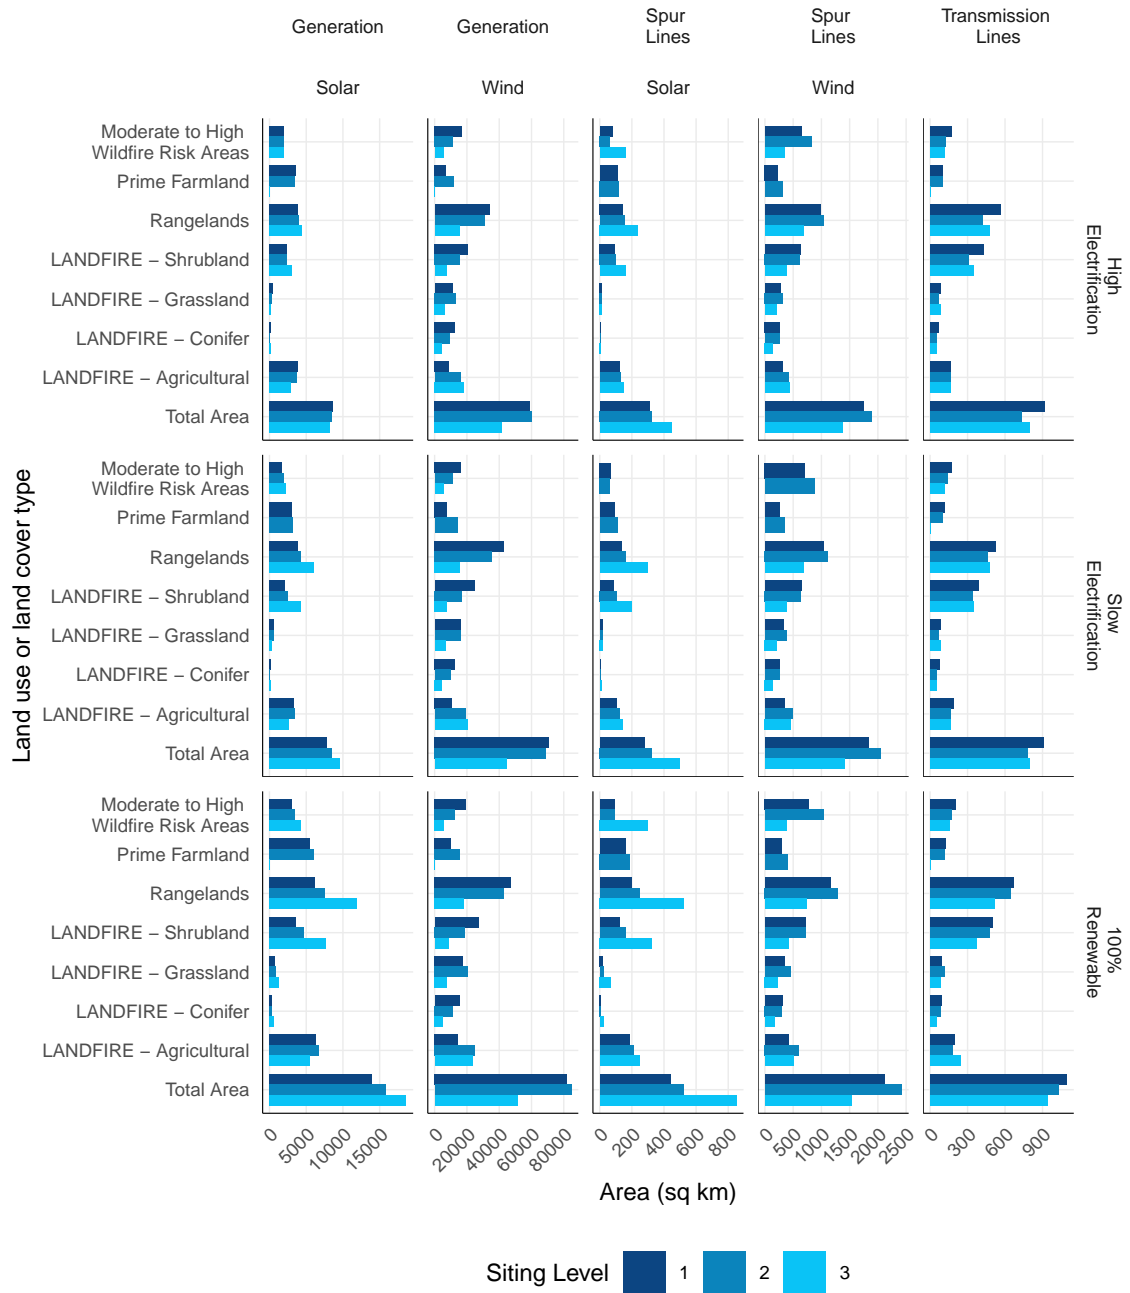

Fig. S27. Land use and land cover impacts for generation, transmission, and spur lines for the three core economy-wide cases at all Siting Levels.

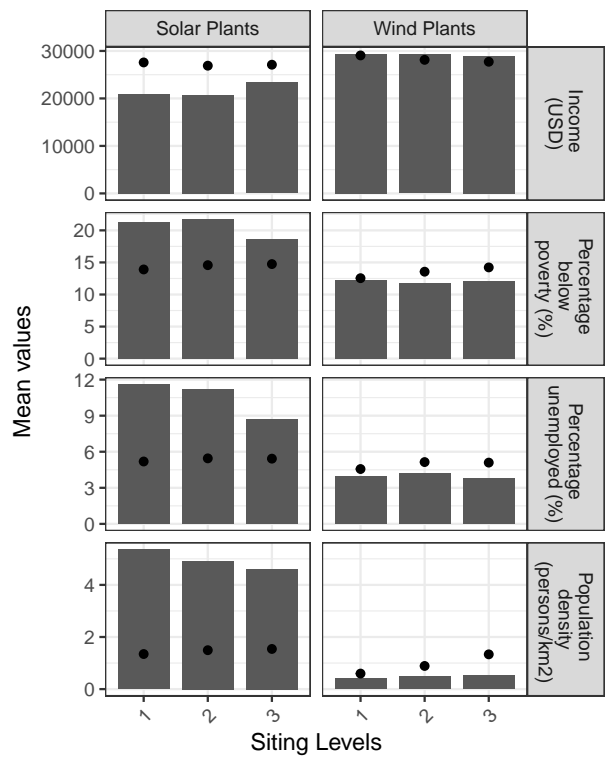

Fig. S28. Social vulnerability index indicators. Points represent the values for candidate project areas whereas the bars show the mean values for selected project areas. )

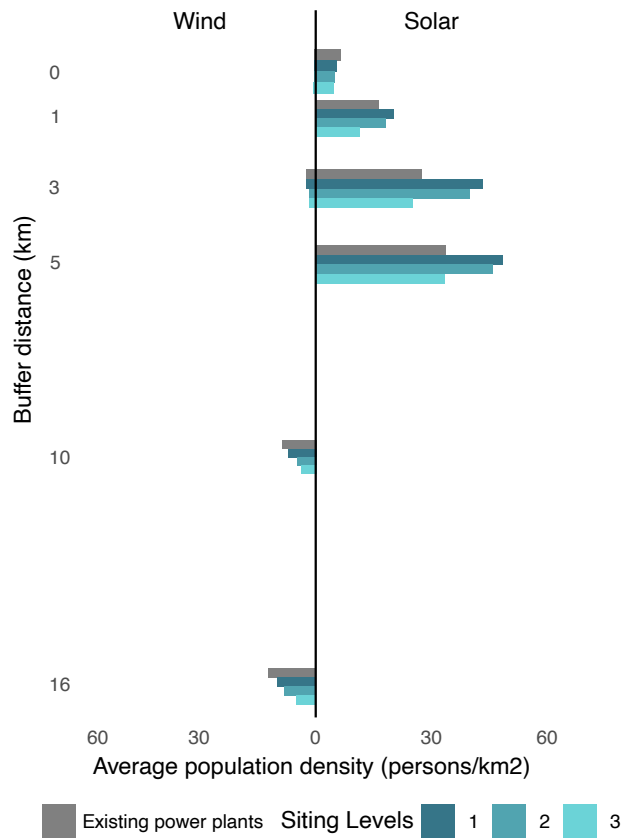

Fig. S29. Average population density of buffered areas around selected wind and solar project areas in the High Electrification scenarios.)

## References

1. GC Wu, et al., Low-impact land use pathways to deep decarbonization of electricity. *Environ. Res. Lett.* **15**, 074044 (2020) 00001 Publisher: IOP Publishing.
2. GC Wu, et al., Land Conservation and Clean Energy Pathways for California, (The Nature Conservancy), Technical Report (2019).
3. California Public Utilities Commission [CPUC], Renewable Energy Transmission Initiative (RETI) Phase 1B, Technical report (2009).
4. R Pletka, J Finn, Western Renewable Energy Zones, Phase 1: QRA Identification Technical Report, (Black & Veatch and National Renewable Energy Laboratory), Technical Report NREL/SR-6A2-46877 (2009).
5. WECC EDTF, Environmental Recommendations for Transmission Planning, Technical report (2011).
6. A Lopez, B Roberts, D Heimiller, N Blair, G Porro, U.S. Renewable Energy Technical Potentials: A GIS-Based Analysis, (National Renewable Energy Laboratory, Golden, CO), Technical Report NREL/TP-6A20-51946 (2012).
7. GC Wu, et al., Integrating Land Conservation and Renewable Energy Goals in California: A Study of Costs and Impacts Using the Optimal Renewable Energy Build-Out (ORB) Model, (The Nature Conservancy), Technical Report (2015).
8. Renewable Energy Action Team, Desert Renewable Conservation Plan (2016).
9. The Nature Conservancy, Resilient Land Mapping Tool (2020) 00000.
10. , *System Advisor Model*. (National Renewable Energy Laboratory, Golden, CO), (year?).
11. J King, A Clifton, BM Hodge, Validation of Power Output for the WIND Toolkit, (National Renewable Energy Laboratory), Technical Report NREL/TP-5D00-61714 (2014).
12. GC Wu, et al., Strategic siting and regional grid interconnections key to low-carbon futures in African countries. *Proc. Natl. Acad. Sci.* p. 201611845 (2017) 00017.
13. GC Wu, MS Torn, JH Williams, Incorporating Land-Use Requirements and Environmental Constraints in Low-Carbon Electricity Planning for California. *Environ. Sci. & Technology* **49**, 2013–2021 (2015) 00012.
14. LM Miller, DW Keith, Climatic Impacts of Wind Power. *Joule* (2018) 00000.
15. LM Miller, DW Keith, Corrigendum: Observation-based solar and wind power capacity factors and power densities (2018 *Environ. Res. Lett.* 13 104008). *Environ. Res. Lett.* **14**, 079501 (2019) 00001.
16. R Borrmann, K Rehfeldt, AK Wallasch, S Luers, Capacity densities of European offshore wind farms, (European Union), Technical report (2018).
17. C Garcia, C Kavalec, California Energy Demand Updated Forecast, 2017 – 2027, (California Energy Commission), Technical Report CEC-200-2016-016-CMF (2017).
18. P Gagnon, R Margolis, J Melius, C Phillips, R Elmore, Estimating rooftop solar technical potential across the US using a combination of GIS-based methods, lidar data, and statistical modeling. *Environ. Res. Lett.* **13**, 024027 (2018) 00004.
19. MH Langholtz, BJ Stokes, LM Eaton, Billion-Ton Report: Advancing Domestic Resources for a Thriving Bioeconomy. *United States* (2016) 00095.
20. E Larson, et al., Net-Zero America: Potential Pathways, Infrastructure, and Impacts, final report summary. *Princet. Univ.* (2021) 00048.
21. N Carr, T Fancher, A Freeman, H Battles Manley, Surface area of solar arrays in the conterminous United States: U.S. Geological Survey data release (2016) 00000.
22. HIFLD, Electric Substations (2020).
23. T Mason, T Curry, D Wilson, Capital costs for transmission and substations, Recommendations for WECC Transmission Expansion Planning, (Western Electricity Coordinating Council), Technical report (2012).
24. U DOE, National Electric Transmission Congestion Study, (U.S. Department of Energy, Washington D.C.), Technical report (2020).
25. E Strategies, Western Flexibility Assessment: Investigating the West's Changing Resource Mix and Implications for System Flexibility, (Western Interstate Energy Board, Salt Lake City, UT), Technical report (2019).
26. CAISO, 2020-2021 Transmission Plan, (California ISO), Technical report (2021).
27. APPENDIX H: Pacific Northwest – California Transfer Increase Informational Special Study, Technical report (2019).
28. HIFLD, Electric Power Transmission Lines (2020).
29. E3, Generation and Transmission Resource Cost Update 2019 (2019).
30. Multi-Resolution Land Characteristics (MRLC) Consortium, Land Cover Data (2016).
31. aLGAP USGS Core Science Analytics, Synthesis, USGS Gap Analysis Project - Additional Data – Slope (2011).
32. GC Wu, et al., Power of Place: Land Conservation and Clean Energy Pathways for California (Executive Summary), (The Nature Conservancy, San Francisco, CA), Executive Summary (2019).
33. D of Transportation, Core Based Statistical Areas (National) (2020).
34. JH Scott, et al., Wildfire Risk to Communities: Spatial datasets of landscape-wide wildfire risk components for the United States (2020).
35. SWCA, Environmental Mitigation Costs Study - Final Report for the Western Electricity Coordination Council, (Western Electricity Coordination Council (WECC)), Technical report (2013).
36. C ISO, Participating transmission owner per unit costs (2020).
37. KL Hall, Out of Sight, Out of Mind 2012 - An Updated Study on the Undergrounding Of Overhead Power Lines, (Edison Electric Institute), Technical report (2013).

38. ESRI, Cost Path As Polyline (year?).
39. P Beiter, et al., The Cost of Floating Offshore Wind Energy in California Between 2019 and 2032, (National Renewable Energy Lab, Golden, CO), Technical Report NREL/TP-5000-77384 (2020).
40. NYD of Public Service Staff, New York State Energy Research and Development Authority Staff, TB Group, P Consulting, Initial Report on the New York Power Grid Study, (New York State Public Service Commission), Technical report (2021).
41. NREL (National Renewable Energy Laboratory), 2020 Annual Technology Baseline, (Golden, CO: National Renewable Energy Laboratory), Technical report (2020).
42. JH Williams, et al., Carbon-Neutral Pathways for the United States. *AGU Adv.* **2**, e2020AV000284 (2021) 00007 \_eprint: <https://agupubs.onlinelibrary.wiley.com/doi/pdf/10.1029/2020AV000284>.
43. BM Sleeter, et al., An integrated approach to modeling changes in land use, land cover, and disturbance and their impact on ecosystem carbon dynamics: a case study in the Sierra Nevada Mountains of California. *AIMS Environ. Sci.* **2**, 577–606 (2015) 00000.
44. S Ong, C Campbell, P Denholm, R Margolis, G Heath, Land-Use Requirements for Solar Power Plants in the United States, (National Renewable Energy Laboratory, Golden, CO), Technical Report NREL/TP-6A20-56290 (2013).
45. RR Hernandez, MK Hoffacker, ML Murphy-Mariscal, GC Wu, MF Allen, Solar energy development impacts on land cover change and protected areas. *Proc. Natl. Acad. Sci.* **112**, 13579–13584 (2015) 00053.
46. WECC, Black & Veatch Corp., Energy and Environmental Economics, WECC 2019 Transmission Capital Cost Tool - with E3 Updates (2019) 00000.
47. SE Baker, et al., Getting to Neutral: Options for negative carbon emissions in California, (Lawrence Livermore National Laboratory), Technical Report LLNL-TR-796100 (2020).
48. WL Rooney, J Blumenthal, B Bean, JE Mullet, Designing sorghum as a dedicated bioenergy feedstock. *Biofuels, Bioprod. Biorefining* **1**, 147–157 (2007) 00703 \_eprint: <https://onlinelibrary.wiley.com/doi/pdf/10.1002/bbb.15>.
49. ME Salassi, et al., Farm-Scale Cost of Producing Perennial Energy Cane as a Biofuel Feedstock. *BioEnergy Res.* **7**, 609–619 (2014) 00019.
50. KB Hall, et al., A Growth and Yield Model for *Eucalyptus benthamii* in the Southeastern United States. *For. Sci.* **66**, 25–37 (2020) 00003.
51. RT Belote, et al., Identifying Corridors among Large Protected Areas in the United States. *PLOS ONE* **11**, e0154223 (2016) 00029.
52. MC Reeves, JE Mitchell, Extent of Coterminous US Rangelands: Quantifying Implications of Differing Agency Perspectives. *Rangel. Ecol. & Management* **64**, 585–597 (2011) 00014.
53. CDC/ATSDR, 2018 Social Vulnerability Index (SVI) (2018).
54. AN Rose, JJ McKee, ML Urban, EA Bright, KM Sims, LandScan 2018 (2019) Edition: 2018 Place: Oak Ridge, TN Section: July 1, 2019.
55. RG Sullivan, et al., Wind Turbine Visibility and Visual Impact Threshold Distances in Western Landscapes, (Argonne National Laboratory), Technical report (year?).
56. RG Sullivan, JM Abplanalp, Utility-scale solar energy facility visual impact characterization and mitigation study, (Argonne National Laboratory), Technical report (2013).
57. RG Sullivan, et al., Visual Impacts of Utility-scale Solar Energy Facilities on Southwestern Desert Landscapes, (Argonne National Laboratory), Technical report (year?).
58. RG Sullivan, et al., Electric transmission visibility and visual contrast threshold distances in western landscapes, (Argonne National Laboratory), Technical report (year?).
59. B Cohen, C Shank, California Industrial-Size Solar Energy Generation Arrays (2018) 00000.
60. Bureau of Land Management, BLM Western Solar Energy Program (WSEP) (2012) 00000.
61. Western Electricity Coordinating Council, ICF, WECC Environmental Data Viewer and Risk Mapping (year?) 00000.
